# Supplementary material for: Prevalence and patterns of multimorbidity among the elderly in China: a cross-sectional study using national survey data
Source: PubMed Central journal article supplement — BMJ Open. 2019 Aug 18;9(8):e024268. doi: 10.1136/bmjopen-2018-024268 (PMC6701688; doi:10.1136/bmjopen-2018-024268), 2019-08-18
Supplement: bmjopen-2018-024268.draft_revisions.pdf [file bmjopen-2018-024268.draft_revisions.pdf]

# BMJ Open

BMJ Open is committed to open peer review. As part of this commitment we make the peer review history of every article we publish publicly available.

When an article is published we post the peer reviewers' comments and the authors' responses online. We also post the versions of the paper that were used during peer review. These are the versions that the peer review comments apply to.

The versions of the paper that follow are the versions that were submitted during the peer review process. They are not the versions of record or the final published versions. They should not be cited or distributed as the published version of this manuscript.

BMJ Open is an open access journal and the full, final, typeset and author-corrected version of record of the manuscript is available on our site with no access controls, subscription charges or pay-per-view fees (<http://bmjopen.bmj.com>).

If you have any questions on BMJ Open's open peer review process please email [info.bmjopen@bmj.com](mailto:info.bmjopen@bmj.com)

# BMJ Open

## Prevalence and patterns of multimorbidity among the elderly in China: a cross-sectional study using national survey data

|                               |                                                                                                                                                                                                                                                                                                                                                                                             |
|-------------------------------|---------------------------------------------------------------------------------------------------------------------------------------------------------------------------------------------------------------------------------------------------------------------------------------------------------------------------------------------------------------------------------------------|
| Journal:                      | <i>BMJ Open</i>                                                                                                                                                                                                                                                                                                                                                                             |
| Manuscript ID                 | bmjopen-2018-024268                                                                                                                                                                                                                                                                                                                                                                         |
| Article Type:                 | Research                                                                                                                                                                                                                                                                                                                                                                                    |
| Date Submitted by the Author: | 18-May-2018                                                                                                                                                                                                                                                                                                                                                                                 |
| Complete List of Authors:     | zhang, ran; China Pharmaceutical University, School of International Pharmaceutical Business<br>Lu, Yun; China Pharmaceutical University, School of International Pharmaceutical Business<br>Shi, Liuyan; China Pharmaceutical University, School of International Pharmaceutical Business<br>Chang, Feng; China Pharmaceutical University, School of International Pharmaceutical Business |
| Keywords:                     | multimorbidity, cross-sectional study, Prevalence, Observed-to-expected ratio, China                                                                                                                                                                                                                                                                                                        |
|                               |                                                                                                                                                                                                                                                                                                                                                                                             |

SCHOLARONE™  
Manuscripts

1  
2  
3  
4 **Prevalence and patterns of multimorbidity among the elderly**  
5  
6 **in China: a cross-sectional study using national survey data**  
7  
8  
9

| <i>Author</i>               | <i>E-mail</i>                       | <i>ORCID ID</i>     |
|-----------------------------|-------------------------------------|---------------------|
| <i>First author</i>         | Ran Zhang    ranzai7@126.com        | 0000-0002-4142-805X |
| <i>Co-authors</i>           | Yun Lu        luyun20159@163.com    | 0000-0002-7928-7176 |
| <i>Co-authors</i>           | Liuyan Shi    juliasmithsly@163.com | 0000-0001-6965-3235 |
| <i>Corresponding author</i> | Feng Chang    cpucf@163.com         | 0000-0003-2689-4041 |

10  
11  
12  
13  
14  
15  
16  
17  
18  
19  
20  
21 **Postal address:** 639 Longmian Road, Jiangning District, Nanjing, Jiangsu  
22  
23 Province, 211198

24  
25  
26 **Telephone number:** +86-13805153128 (Feng Chang)

27  
28 **Department:** School of International Pharmaceutical Business

29  
30  
31 **Institution:** China Pharmaceutical University

32  
33  
34 **City:** Nanjing, Jiangsu Province

35  
36  
37 **Country:** China

## ABSTRACT

**Objectives:** To examine the prevalence and patterns of multimorbidity among the elderly in China.

**Design:** The cross-sectional study.

**Setting:** More than 10,000 households in 28 of the 34 provinces of mainland China.

**Participants:** 11707 Chinese adults aged over 60.

**Primary outcome measures:** Prevalence and patterns of multimorbidity of these participants. Relative risks were calculated to estimate the probability of chronic conditions coexisting with other chronic diseases. Observed-to-expected ratios were used to analyze the patterns of multimorbidity.

**Results:** Multimorbidity was present in 43.6% respondents of the sample, with women having greater prevalence compared to men. 804 different comorbidity combinations were identified, including 76 dyad combinations and 169 triad combinations. The top 10 morbidity dyads and triads accounted for 69.01% and 47.05% of the total dyad and triad combinations respectively. Among the fourteen chronic conditions included in the study, asthma, stroke, heart attack and other six chronic conditions were the main components of multimorbidity due to their high relative risk ratios. The most frequently occurring clusters with higher O/E ratios were stroke and emotional, nervous, or psychiatric problems and memory-related diseases, emotional, nervous, or psychiatric problems and memory-related diseases and asthma, and chronic lung diseases and asthma.

**Conclusions:** The results of this study highlighted the high prevalence of multimorbidity in the elderly population. Further studies are required to dig into the etiology of multimorbidity and future primary healthcare policies should take multimorbidity into consideration.

## Strengths and limitations of this study

### Strengths

- This is the first study to estimate the prevalence, patterns of multimorbidity among the elderly in China using data from a nationally representative survey.
- We examined the gender patterns associated with the most common clusters of chronic conditions.

### Limitations

- Limitations of this study are the time lag since the data were collected from the 2015 CHARLS.
- The chronic diseases included in the study are predefined and not comprehensive enough.

## INTRODUCTION

Multimorbidity, the simultaneous occurrence of two or more chronic conditions in an individual, is increasingly becoming the norm and was reported to increase progressively with age. [1, 2] At present, with China's aging population and increasing prevalence of chronic conditions, multimorbidity among the elderly imposes an enormous societal cost due to increased mortality rates and healthcare utilization. However, to date, researches on chronic conditions in China are focused on a single disease and the coexistence of multiple chronic conditions has not been investigated systematically and thoroughly.

There are significant differences in the etiological analysis between patients with a single chronic condition and those with multimorbidity. [3] The coexistence of chronic conditions in a patient is more than a random event. It is more likely to be due to the causal relationship between diseases and the pathogenic factors they share.[4, 5] Moreover, the interactions between diseases or between disease and organism result in differences in severity of multimorbidity and functional status and prognosis of patients with multimorbidity.[6] Consequently, it is urgent for China to begin research on multimorbidity for the cost-effective treatments it may lead to.[7] The purpose of this study is therefore to determine the prevalence of multimorbidity among the elderly in China and to reveal morbidity combinations, which may benefit the design and implementation of a healthcare system directed to patients with multimorbidity.

## METHODS

### Data source

Data for this study were collected from the third-wave of China Health and Retirement Longitudinal Survey (CHARLS), which is the most current data available. CHARLS, a nationally representative longitudinal survey of Chinese residents aged 45 and older, was conducted by the Chinese Center for Disease Control and Prevention and Peking University to help China to adjust to rapid ageing of its population through evaluation of social, economic, and health circumstances on the community level using data collected by interviews, physical measurements and blood sample collection.[8] The national baseline survey began in 2011 and involved 17 708 respondents scattered

1  
2  
3 in 150 county-level units, 450 village-level units, and approximately 10,000  
4 households. Thereafter, CHARLS respondents were followed every 2 years with their  
5 informed consent and the study was approved by Peking University Biomedical Ethics  
6 Committee (IRB00001052-14013-exemption).  
7  
8

9 For the current study, we used data on gender, age and health status from the section  
10 of the general health status and disease history of senior citizens in the 2015 CHARLS,  
11 which covered the following 14 common chronic health problems: hypertension,  
12 dyslipidemia (high blood lipids or low cholesterol), diabetes or elevated blood glucose  
13 (including impaired glucose tolerance and fasting blood glucose), cancer (excluding  
14 mild skin cancer), chronic lung disease such as chronic bronchitis or emphysema,  
15 pulmonary heart disease (excluding tumor or cancer), liver disease (other than fatty  
16 liver, tumor, or cancer), heart disease (such as myocardial infarction, coronary heart  
17 disease, angina pectoris, congestive heart failure and other heart diseases), stroke,  
18 kidney disease (excluding tumors or cancer), stomach or other digestive diseases  
19 (excluding tumor or cancer), emotional and mental problems, memory-related diseases  
20 (such as Alzheimer's disease, brain atrophy, Parkinson's disease), arthritis or  
21 rheumatism, and asthma. All these data were based on self-reports.  
22  
23  
24  
25  
26  
27  
28  
29  
30  
31

### 32 **Variables**

33 The independent variables in the analysis were: age, sex, number of chronic diseases.  
34 Since in China people over 60 were considered as senior citizens, we only included  
35 respondents aged over 60 in the sample. In this study, multimorbidity was defined as  
36 the coexistence of more than one of the 14 chronic conditions with acute or subacute  
37 forms of certain conditions being excluded.  
38  
39  
40  
41  
42

### 43 **Statistical analysis**

44 To detect the demographic characteristics of patients with multimorbidity,  
45 respondents were divided into two groups: those with multiple chronic conditions  
46 (MCC group) and those without multiple chronic conditions (Non-MCC group).  
47 Descriptive statistics were calculated and expressed as means (SD) and frequencies  
48 (percentage). Adjusted prevalence in the MCC group and the non-MCC group were  
49 calculated separately.  
50  
51  
52  
53

54 The most common clusters of chronic diseases were identified by estimating the  
55 prevalence of morbidity dyads and triads. We also calculated the relative risk of  
56  
57  
58

comorbidity for individual chronic conditions and observed-to-expected ratio (O/E ratio) for chronic condition combinations according to VAN DEN's analysis method.[9] Relative risk of comorbidity is the ratio of the number of people with a certain chronic condition who suffer from multimorbidity to the number of patients with the same disease who do not suffer from multimorbidity.[10, 11] In other words, a higher RR value means a higher probability that the disease coexists with other diseases. But it should be noted that there is no direct relationship between relative risk of comorbidity and the prevalence of diseases. [12, 13] Observed-to-expected ratios were used to estimate the conditional probability of coexistence of two or three chronic conditions. [9]

All analyses in this study was done using STATA SE(StataCorp).

p Values <0.05 were considered statistically significant.

## RESULTS

### Characteristics of participants

The data were gathered from the third-wave of CHARLS. After exclusion of participants with incomplete data related to these fourteen chronic conditions, 11,707 respondents with available information on related chronic diseases were included in this study. The mean age for the sample was 70.5 (range from 60 to 107) which consisted of 5,705 (48.7%) males and 5,993 (51.2%) females. The demographic characteristics of sample respondents are presented in Table 1.

**Table 1 Demographic characteristics of all respondents, the MCC group and non-MCC group (adjusted for the 2015 Chinese population)**

|                                   | All respondents | MCC group    | Non-MCC group | P*     |
|-----------------------------------|-----------------|--------------|---------------|--------|
| Number of people                  | 11707           | 5107         | 6600          |        |
| Proportion (%)                    | 100%            | 43.62%       | 56.38%        |        |
| Mean age                          |                 |              |               |        |
| All respondents (SD)              | 70.20(7.907)    | 70.57(7.701) | 69.91(8.051)  | <0.001 |
| Male (SD)                         | 69.97(7.575)    | 70.50(7.348) | 69.60(7.707)  | <0.001 |
| Female (SD)                       | 70.39(8.189)    | 70.62(7.892) | 70.19(8.359)  | <0.001 |
| Gender (% females)                | 51.28%          | 54.41%       | 48.83%        | <0.001 |
| Mean number of chronic conditions |                 |              |               |        |



|                      |             |             |             |        |
|----------------------|-------------|-------------|-------------|--------|
| All respondents (SD) | 1.57(1.560) | 3.01(1.259) | 0.45(0.498) | <0.001 |
| <b>Male</b> (SD)     | 1.47(1.534) | 2.98(1.265) | 0.44(0.496) | <0.001 |
| <b>Female</b> (SD)   | 1.65(1.581) | 3.03(7.982) | 0.47(0.499) | <0.001 |

SD = standard deviation;

p\* = statistical significance of the difference between the MCC and the non-MCC sample (t-tests were performed for comparison of means, and chi-square-tests for differences between percentages)

As expected, patients in the MCC group were generally older than those belonged to the non-MCC group. The prevalence of multimorbidity of females was higher compared to men (54.41% vs 45.59%), which could be explained by the longer average life expectancy of women. [14, 15] Figure 1 shows the number and proportion of respondents over 60 according to morbidity numbers. It can be seen that among all the participants aged over 60, 43.6% suffer from multimorbidity. Considering that the prevalence of these fourteen chronic diseases in the elderly population in China has reached 69.10%, multimorbidity would be a major problem faced by the health care system.

### Prevalence of chronic conditions

Adjusted prevalence of chronic conditions in the entire sample, the MCC group and the non-MCC group are shown in figure 2. The prevalence of all fourteen chronic conditions in MCC group were all over 10%, significantly higher than that in the entire sample. For instance, the prevalence of arthritis or rheumatism, hypertension, stomach or other digestive disease, heart disease and chronic lung disease in the entire sample were 38.49%, 26.41%, 24.52%, 12.32% and 12.32% respectively, compared to 65.97%, 48.82%, 45.86%, 29.00% and 24.97% in MCC group.

Table 2 shows the relative risks of comorbidity for the 14 chronic diseases. It can be seen from the table that the overall relative risks for asthma, stroke, heart disease and other six conditions were all above ten, which meant these diseases were ten times easier to coexist with other chronic conditions and lead to multimorbidity. In addition, the relative risks for certain diseases were positively associated with gender. For example, men had significantly higher relative risks for asthma yet lower relative risks

for diabetes or high blood sugar compared to women.

**Table 2** Relative risks of multimorbidity for different chronic conditions according to gender

| Chronic conditions                          | All respondents | Female | Male  |
|---------------------------------------------|-----------------|--------|-------|
| <b>High relative risk of multimorbidity</b> |                 |        |       |
| Asthma                                      | 31.77           | 23.13  | 32.86 |
| Stroke                                      | 22.60           | 17.94  | 19.82 |
| Heart disease                               | 18.88           | 15.65  | 14.61 |
| Diabetes or high blood sugar                | 17.47           | 17.41  | 10.72 |
| Dyslipidemia                                | 17.05           | 14.42  | 13.54 |
| Memory-related disease                      | 16.61           | 14.07  | 12.58 |
| Kidney disease                              | 14.04           | 15.30  | 9.08  |
| Liver disease                               | 13.46           | 14.00  | 9.25  |
| Chronic lung diseases                       | 11.97           | 10.37  | 9.47  |
| <b>Low relative risk of multimorbidity</b>  |                 |        |       |
| Emotional, nervous, or psychiatric problems | 9.00            | 7.14   | 7.62  |
| Stomach or other digestive disease          | 6.96            | 6.00   | 5.30  |
| Hypertension                                | 6.52            | 5.25   | 5.53  |
| Cancer or malignant tumor                   | 5.92            | 5.24   | 3.73  |
| Arthritis or rheumatism                     | 4.65            | 3.81   | 3.79  |

### Common multimorbidity combinations

804 possible comorbidity combinations were identified in the MCC group after statistical analysis, including 76 dyad combinations and 169 triad combinations. The leading 10 most frequently occurring morbidity dyads and triads were presented respectively in [table 3](#) and [table 4](#).

**Table 3** Adjusted prevalence of the 10 most common morbidity dyads

| Ranking | Morbidity dyads                                                | Prevalence      |        |        | Mean Age | Proportion |
|---------|----------------------------------------------------------------|-----------------|--------|--------|----------|------------|
|         |                                                                | All respondents | male   | female |          |            |
| 1       | Arthritis or rheumatism and Stomach or other digestive disease | 4.73%           | 38.63% | 61.37% | 69.20    | 23.33%     |
| 2       | Arthritis or rheumatism and                                    | 2.85%           | 39.64% | 60.36% | 71.25    | 14.06%     |

|    |                                                        |       |        |        |       |       |
|----|--------------------------------------------------------|-------|--------|--------|-------|-------|
|    | Hypertension                                           |       |        |        |       |       |
| 3  | Arthritis or rheumatism and<br>Chronic lung diseases   | 1.13% | 55.30% | 44.70% | 71.55 | 5.56% |
| 4  | Hypertension and heart<br>problems                     | 1.03% | 50.00% | 50.00% | 71.80 | 5.05% |
| 5  | Hypertension and Stomach<br>or other digestive disease | 0.89% | 48.08% | 51.92% | 69.07 | 4.38% |
| 6  | Hypertension and<br>Dyslipidemia                       | 0.86% | 48.51% | 51.49% | 68.58 | 4.25% |
| 7  | Arthritis or rheumatism and<br>heart problems          | 0.76% | 35.96% | 64.04% | 70.72 | 3.75% |
| 8  | Arthritis or rheumatism and<br>Kidney disease          | 0.64% | 58.67% | 41.33% | 68.24 | 3.16% |
| 9  | Hypertension and Diabetes<br>or high blood sugar       | 0.58% | 44.12% | 55.88% | 70.97 | 2.86% |
| 10 | Chronic lung diseases and<br>Asthma                    | 0.53% | 62.90% | 37.10% | 71.15 | 2.61% |

**Table 4 Adjusted prevalence of the 10 most common morbidity triads**

| Rank<br>ing | Morbidity triads                                                                               | Prevalence         |        |        | Mean Age | Proport<br>ion |
|-------------|------------------------------------------------------------------------------------------------|--------------------|--------|--------|----------|----------------|
|             |                                                                                                | All<br>respondents | male   | female |          |                |
| 1           | Arthritis or rheumatism,<br>Stomach or other digestive<br>disease and Hypertension             | 1.19%              | 45.08% | 54.92% | 70.96    | 10.14%         |
| 2           | Arthritis or rheumatism,<br>Stomach or other digestive<br>disease and Chronic lung<br>diseases | 0.82%              | 34.53% | 65.47% | 70.82    | 7.00%          |
| 3           | Arthritis or rheumatism,<br>Heart disease and<br>Hypertension                                  | 0.63%              | 60.42% | 39.58% | 69.93    | 5.40%          |
| 4           | Arthritis or rheumatism,<br>Heart disease and Stomach<br>or other digestive disease            | 0.59%              | 29.73% | 70.27% | 71.51    | 5.03%          |
| 5           | Hypertension,<br>Dyslipidemia and Arthritis<br>or rheumatism                                   | 0.44%              | 21.74% | 78.26% | 70.13    | 3.79%          |

|    |                                                                                         |       |        |        |       |       |
|----|-----------------------------------------------------------------------------------------|-------|--------|--------|-------|-------|
| 6  | Hypertension,<br>Dyslipidemia and Heart<br>problems                                     | 0.42% | 36.54% | 63.46% | 71.17 | 3.57% |
| 7  | Arthritis or<br>rheumatism, Kidney<br>disease and Stomach or<br>other digestive disease | 0.42% | 42.86% | 57.14% | 70.14 | 3.57% |
| 8  | Arthritis or rheumatism,<br>Asthma and Chronic lung<br>diseases                         | 0.40% | 48.98% | 51.02% | 69.18 | 3.43% |
| 9  | Hypertension,<br>Dyslipidemia and Diabetes<br>or high blood sugar                       | 0.35% | 59.57% | 40.43% | 71.51 | 2.99% |
| 10 | Arthritis or rheumatism,<br>Stomach or other digestive<br>disease and Liver disease     | 0.53% | 51.22% | 48.78% | 70.29 | 2.61% |

Theoretically, there were 91 possible dyad combinations and 364 triad combinations of 14 different chronic conditions. However, only 79.12% (72 types) of the possible dyad combinations and 46.43% (169 types) of the triad combinations emerged in the sample. The 10 most frequently occurring morbidity dyads accounted for 69.01% of the 72 dyad combinations, and the proportion of the 10 most common triad combinations in the 169 triad combinations was 47.05%. Arthritis or rheumatism, which appeared five times in the top ten dyad combinations and eight times in the top ten triad combinations of chronic conditions, became the main component of the leading morbidity dyads and triads.

There were significant gender differences in the odds of these multimorbidity combinations. The number of women with triad combinations of chronic diseases were generally higher than that of men with the same morbidity triads. For example, women had significantly higher prevalence of arthritis and hypertension and hyperlipidemia than men (78.26% vs 21.74%). Among morbidity dyads, the prevalence of heart disease and arthritis or rheumatism in women was nearly two times higher than that in men while the cluster of arthritis or rheumatism and kidney disease occurred more

frequently in men than in women. No age difference in the probability of these multimorbidity combinations was detected.

O/E ratio was also used to analyze the multimorbidity pattern. [16] The higher the value, the higher the probability of coexistence of chronic conditions. [17] Table 5 shows O/E ratios for the 10 most prevalent morbidity dyads and triads. In the midst of those triad combinations of chronic conditions, the two clusters with significantly higher O/E ratios were emotional, nervous, or psychiatric problems and stroke and memory-related disease (O/E ratio=10287.72), emotional, nervous, or psychiatric problems and memory-related disorders and asthma (O/E ratio=8498.56). These four conditions also dominated the three leading dyads with the highest O/E ratios: 97.73 for the combination of emotional and mental disorders and memory-related diseases, 23.66 for the combination of stroke and memory related disease and 19.55 for the combination of memory-related disease and asthma.

**Table 5 O/E ratios for the 10 most prevalent morbidity dyads and triads**

| Number of chronic conditions | Ranking | Chronic conditions                                                             | O/E ratio |
|------------------------------|---------|--------------------------------------------------------------------------------|-----------|
| 2                            | 1       | Chronic lung diseases and Asthma                                               | 162.15    |
|                              | 2       | Emotional, nervous, or psychiatric problems and Memory-related disease         | 97.73     |
|                              | 3       | Dyslipidemia and Diabetes or high blood sugar                                  | 38.39     |
|                              | 4       | Heart disease and Memory-related disease                                       | 25.69     |
|                              | 5       | Stroke and Memory-related disease                                              | 23.66     |
|                              | 6       | Hypertension and Stroke                                                        | 22.85     |
|                              | 7       | Hypertension and Diabetes or high blood sugar                                  | 20.64     |
|                              | 8       | Cancer or malignant tumor and Stroke                                           | 19.55     |
|                              | 9       | Memory-related disease and Asthma                                              | 19.55     |
|                              | 10      | Stroke and Asthma                                                              | 19.55     |
| 3                            | 1       | Stroke, Emotional, nervous, or psychiatric problems and Memory-related disease | 10287.72  |

|    |                                                                                |         |
|----|--------------------------------------------------------------------------------|---------|
| 2  | Emotional, nervous, or psychiatric problems, Memory-related disease and Asthma | 8498.56 |
| 3  | Emotional, nervous, or psychiatric problems, Chronic lung diseases and Asthma  | 2274.26 |
| 4  | Heart disease, Stroke and Memory-related disease                               | 2253.50 |
| 5  | Chronic lung diseases, Heart disease and Asthma                                | 1992.69 |
| 6  | Dyslipidemia, Heart disease and Memory-related disease                         | 1443.25 |
| 7  | Hypertension, Dyslipidemia and Diabetes or high blood sugar                    | 1398.31 |
| 8  | Hypertension, Stroke and Memory-related disease                                | 1387.35 |
| 9  | Chronic lung diseases, Memory-related disease and Asthma                       | 1376.53 |
| 10 | Chronic lung diseases, Arthritis or rheumatism and Asthma                      | 1265.95 |

## DISCUSSION

This is the first study to estimate the prevalence, patterns of multimorbidity among the elderly in China based on the nationally representative data from CHARLS, which covered 11,707 Chinese senior citizens aged over 60. The results of the study indicated that the prevalence of the 14 chronic diseases in the elderly reached 69.10% in China, and 43.6% of the elderly population suffered from multimorbidity. The average age of the entire sample was 0.66 years higher than that of the non-MCC group and in the MCC group, the mean age of women was 0.59 years higher than that of men, which was comparable to the results of previous studies. [18-22]

The prevalence of multimorbidity estimated in this study was much lower than that from previous studies in developed countries. A study of 543 patients over 65 in Ghent, Belgium showed that the multimorbidity rate was as high as 82.6%, [23].

1  
2  
3 Another study in Australia showed that 83.2% of the respondents suffered from  
4 multimorbidity, [24] However, it is difficult to compare the prevalence generated from  
5 different studies due to differences in the definition of multimorbidity, demographic  
6 characteristics and study methodologies. [25-29]  
7  
8  
9

10 In line with previous studies, increased age was found to be significantly associated  
11 with higher prevalence of multimorbidity and there was also gender differences in the  
12 rates of certain clusters of chronic conditions, which is understandable in view of the  
13 distinction between female and male in terms of physiological features and lifestyles.  
14 [30, 31]  
15  
16  
17  
18

19 In agreement with previous reports, arthritis or rheumatism, hypertension, stomach  
20 or other digestive disease were the most common diseases in the MCC group. [10]  
21 The prevalence of these three conditions was all above 20% in the entire sample and  
22 above 45% in the MCC group. The most prevalent chronic combinations in the  
23 sample could also be found in other studies. [23]  
24  
25  
26  
27  
28

29 Although, arthritis or rheumatism, a component of all the leading three morbidity  
30 dyads and triads, was also the most commonly occurring disease in multimorbidity, the  
31 relative risk of this disease was only 4.65, the lowest in the 14 chronic diseases.  
32 Moreover, arthritis or rheumatism is less common in morbidity clusters with large O/E  
33 ratios. Therefore, the frequent occurrence of arthritis or rheumatism in multimorbidity  
34 might be simply due to the high prevalence of the disease.  
35  
36  
37  
38  
39

40 The relative risks for asthma, stroke, heart disease, and other six conditions were all  
41 above ten, which meant that patients with these diseases were ten times easier to be  
42 tormented by multimorbidity. These diseases also occurred at a high frequency in  
43 multimorbidity with high O/E ratios, such as the clusters of pulmonary disease and  
44 asthma, emotional and mental illness and memory-related disease, dyslipidemia and  
45 diabetes, and stroke and emotional or mental illness and memory-related disease.  
46 Patients with these diseases were vulnerable to comorbidity compared to those without  
47 these diseases and thus should be the focus of future study.  
48  
49  
50  
51  
52  
53

54 This study featured the nationally representative sample of Chinese elderly  
55  
56  
57

1  
2  
3 population, which was crucial to get an overall picture regarding multimorbidity among  
4 the elderly in China. However, there were also limitations. First, this study used data  
5 from the third wave of CHARLS, a survey which was conducted in 2015, the time lag  
6 therefore was inevitable. Second, the chronic diseases included in the study were not  
7 comprehensive enough, since only 15 chronic conditions were included in the survey.  
8 Third, the outcome was based on self-report, which may have introduced some  
9 misclassification bias. Later researches on the prevalence and patterns of  
10 multimorbidity need to be carried out in depth with a more extensive survey of chronic  
11 disease.  
12  
13  
14  
15  
16  
17  
18  
19  
20

## 21 **CONCLUSIONS**

22  
23 Multimorbidity still remains an underexplored area of research in China. [32].  
24 Despite the increasing prevalence of multimorbidity, there is no specific proposals for  
25 its diagnosis and treatment. [33] This study contributes to the understanding of the  
26 prevalence and patterns of comorbidity among the elderly in China. Considering  
27 China's aging population and the high prevalence of comorbidity in senior citizens, the  
28 elderly should be prioritized in the fields of disease prevention and health promotion.  
29  
30  
31  
32  
33  
34  
35  
36  
37

38 **Acknowledgements** The authors would like to thank the Chinese Center for Disease  
39 Control and Prevention and Peking University for China Health and Retirement  
40 Longitudinal Survey.  
41  
42

43 **Contributors** RZ analyzed and interpreted data, drafted the manuscript, approved the  
44 final manuscript as submitted. YL revised the manuscript for important intellectual  
45 content. LS analyzed and interpreted data and revised the manuscript for important  
46 intellectual content. FC helped on the study design and revised the manuscript on the  
47 study design and revised the manuscript.  
48  
49  
50  
51

52 **Funding** This work was funded by the National Natural Science Foundation of China  
53 (7167030838).  
54  
55  
56  
57



1  
2  
3 **Competing interests** None declared.

4  
5 **Patient consent** Obtained.

6  
7 **Ethics approval** The original CHARLS was approved by the ethics review committee  
8 of Peking University, and all participants gave written informed consent at the time of  
9 participation  
10

11  
12 **Data sharing statement** No additional data are available  
13  
14

## 15 16 REFERENCES

- 17  
18 1. Barnett K, Mercer SW, Norbury M, et al. Epidemiology of multimorbidity and  
19 implications for health care, research, and medical education: a cross-sectional  
20 study. *Lancet* 2012; 380:37–43.doi: 10.1016/S0140-6736(12)60240-2  
21  
22 2. World Health Organization. Global status report on noncommunicable diseases,  
23 2014.http://apps.who.int/nmh/publications/ncd-status-report-2014/en/index.html  
24 (accessed 27 Oct 2017)  
25  
26 3. Moffat K, Mercer SW. Challenges of managing people with multimorbidity in  
27 today's healthcare systems. *BMC Fam Prac* 2015;16:129.doi:  
28 10.1186/s12875-015-0344-4  
29  
30 4. Schäfer Ingmar, von Leitner Eike-Christin, Schön Gerhard et al. Multimorbidity  
31 patterns in the elderly: a new approach of disease clustering identifies complex  
32 interrelations between chronic conditions. *PLoS One* 2010;12:e15941.doi:  
33 10.1371/journal.pone.0015941  
34  
35 5. Atun R. Transitioning health systems for multimorbidity. *Lancet* 2015;386:721–  
36 2.doi: 10.1016/S0140-6736(14)62254-6  
37  
38 6. Wolff JL, Starfield B, Anderson G. Prevalence, expenditures, and complications of  
39 multiple chronic conditions in the elderly. *Arch Intern Med* 2002;20: 2269-2276.doi:  
40 10.1001/archinte.162.20.2269  
41  
42 7. Yang L, Wu M, Cui B, et al. Economic burden of cardiovascular diseases in China.  
43 *Expert Rev Pharmacoecon Outcomes Res* 2008;8:349–56.doi:  
44 10.1586/14737167.8.4.349  
45  
46  
47  
48  
49  
50  
51  
52  
53  
54  
55  
56

- 1  
2  
3 8. Zhao Y, Hu Y, Smith JP, et al. Cohort profile: the China Health and Retirement  
4 Longitudinal Study (CHARLS). *Int J Epidemiol* 2014;1:61-69.doi:  
5 10.1093/ije/dys203  
6  
7
- 8  
9 9. Van den Bussche H, Koller D, Kolonko T, et al. Which chronic diseases and disease  
10 combinations are specific to multimorbidity in the elderly? Results of a claims data  
11 based cross-sectional study in Germany. *BMC Public Health* 2011;11:101-110.doi:  
12 10.1186/1471-2458-11-101  
13  
14
- 15  
16 10. Viera AJ. Odds ratios and risk ratios: what's the difference and why does it matter?  
17 *South Med J* 2008; 7: 30-34.doi:10.1097/SMJ.0b013e31817a7ee4  
18
- 19  
20 11. Zhang J, Yu KF. What's the relative risk? A method of correcting the odds ratio in  
21 cohort studies of common outcomes. *JAMA*1998;19:1690-1691.doi:  
22 10.1001/jama.280.19.1690  
23  
24
- 25  
26 12. McNutt LA, Wu C, Xue X, et al. Estimating the Relative Risk in Cohort Studies  
27 and Clinical Trials of Common Outcomes. *Am J Epidemiol* 2003;10:940-943.doi:  
28 10.1002/cncr.30192  
29  
30
- 31  
32 13. Marengoni A, Rizzuto D, Wang HX, et al. Patterns of chronic multimorbidity in the  
33 elderly population. *J Am Geriatr Soc*2009;57:225-  
34 30.doi:10.1111/j.1532-5415.2008.02109.x  
35
- 36  
37 14. Zhao, Shuyan. An Exploration of the Underlying Causes for Formation that a Gap  
38 between Chinese Woman's and Man's Life Expectancy is Narrower than World  
39 Average. *Ssrn Electronic Journal* 2014; 2: 212-221.doi:10.2139/ssrn.2410569  
40
- 41  
42 15. Crimmins EM, Kim JK, Solé-Auró A. Gender differences in health: results from  
43 SHARE, ELSA and HRS. *Eur J Public Health* 2011;21:81-91.doi:  
44 10.1093/eurpub/ckq022  
45  
46
- 47  
48 16. Best WR, Cowper DC. The Ratio of Observed-to-Expected Mortality as a Quality  
49 of Care Indicator in Non-Surgical VA Patients. *Med Care* 1994;4:390-400.doi:  
50 10.1097/00005650-199404000-00007  
51
- 52  
53 17. Kastenholz KE, Weis M, Hagelstein C, et al. Correlation of Observed-to-Expected  
54 MRI Fetal Lung Volume and Ultrasound Lung-to-Head Ratio at Different  
55  
56

- 1  
2  
3 Gestational Times in Fetuses With Congenital Diaphragmatic Hernia. *AJR Am J*  
4 *Roentgenol*2016;4:856-866.doi:10.2214/AJR.15.15018  
5  
6  
7 18. Melis R, Marengoni A, Angleman S, et al. Incidence and predictors of  
8 multimorbidity in the elderly: a population-based longitudinal study. *PLoS One*  
9 2014; 9: e103120.doi:10.1371/journal.pone.0103120  
10  
11  
12 19. Laan W, Bleijenberg N, Drubbel I, et al. Factors associated with increasing  
13 functional decline in multimorbid independently living older people. *Maturitas*  
14 2013; 75: 276–81.doi:10.1016/j.maturitas.2013.04.005  
15  
16  
17 20. Eckerblad J, Theander K, Ekdahl A, et al. To adjust and endure: a qualitative study  
18 of symptom burden in older people with multimorbidity. *Appl Nurs Res*  
19 2015;28:322–7.doi:10.1016/j.apnr.2015.03.008  
20  
21  
22 21. Wister A, Kendig H, Mitchell B, et al. Multimorbidity, health and aging in Canada  
23 and Australia: a tale of two countries. *BMC Geriatr*2016;1:163-176.doi:  
24 10.1186/s12877-016-0341-z  
25  
26  
27 22. Afshar S, Roderick PJ, Kowal P, et al. Multimorbidity and the inequalities of global  
28 ageing: a cross-sectional study of 28 countries using the World Health Surveys.  
29 *BMC Public Health*2015;15:776-786.doi:10.1186/s12889-015-2008-7  
30  
31  
32 23. Boeckxstaens P, Peersman W, Goubin G, et al. A practice-based analysis of  
33 combinations of diseases in patients aged 65 or older in primary care. *BMC Family*  
34 *Practice* 2014;1:1-6.doi:  
35  
36  
37 24. Britt HC , Harrison CM , Miller GC , et al . Prevalence and patterns of  
38 multimorbidity in Australia. *Med J Aust* 2008;2: 72-77  
39  
40  
41 25. Glynn LG , Valderas JM , Healy P , et al . The prevalence of multimorbidity in  
42 primary care and its effect on health care utilization and cost. *Fam Pract*  
43 2011;28:516–23.doi:10.1093/fampra/cm1013  
44  
45  
46 26. Marengoni A , Angleman S , Melis R , et al . Aging with multimorbidity: a  
47 systematic review of the literature. *Ageing Res Rev* 2011;10:430–  
48 9.doi:10.1016/j.arr.2011.03.003  
49  
50  
51 27. Barnett K , Mercer SW , Norbury M , et al . Epidemiology of multimorbidity and  
52 implications for health care, research, and medical education: a cross-sectional  
53 study. *Lancet* 2012;380:37–43.doi:10.1016/S0140-6736(12)60240-2  
54  
55  
56  
57  
58  
59  
60

- 1  
2  
3 28. Fortin M , Stewart M , Poitras ME , et al . A systematic review of prevalence studies  
4 on multimorbidity: toward a more uniform methodology. *Ann Fam Med*  
5 2012;10:142–51.doi:10.1370/afm.1337  
6  
7  
8 29. Fortin M , Hudon C , Haggerty J , et al . Prevalence estimates of multimorbidity: a  
9 comparative study of two sources. *BMC Health Serv Res*  
10 2010;10:111.doi:10.1186/1472-6963-10-1  
11  
12 30. Schäfer I, von Leitner E C, Schön G, et al. Multimorbidity Patterns in the Elderly: A  
13 New Approach of Disease Clustering Identifies Complex Interrelations between  
14 Chronic Conditions[J]. *Plos One*, 2010, 5(12):e15941.doi:  
15 10.1371/journal.pone.0015941  
16  
17 31. Scherer M, Hansen H, Gensichen J, et al. Association between multimorbidity  
18 patterns and chronic pain in elderly primary care patients: a cross-sectional  
19 observational study. *BMC Family Practice*. 2016;17:68.  
20  
21 doi:10.1186/s12875-016-0468-1.  
22  
23  
24 32. Bao W, Hu D, Shi X, et al. Comorbidity increased the risk of falls in Chinese older  
25 adults: A cross-sectional study. *Int J Clin Exp Med*,2017;7:10753-10763.  
26  
27  
28 33. Gao N, Yuan Z, Tang X, et al. Prevalence of CHD-related metabolic comorbidity of  
29 diabetes mellitus in Northern Chinese adults: the REACTION study. *J Diabetes*  
30  
31  
32  
33  
34  
35  
36  
37  
38  
39  
40  
41  
42  
43  
44  
45  
46  
47  
48  
49  
50  
51  
52  
53  
54  
55  
56  
57  
58  
59  
60

1  
2  
3  
4  
5  
6  
7  
8  
9  
10  
11  
12  
13  
14  
15  
16  
17  
18  
19  
20  
21  
22  
23  
24  
25  
26  
27  
28  
29  
30  
31  
32  
33  
34  
35  
36  
37  
38  
39  
40  
41  
42  
43  
44  
45  
46  
47  
48  
49  
50  
51  
52  
53  
54  
55  
56  
57  
58  
59  
60

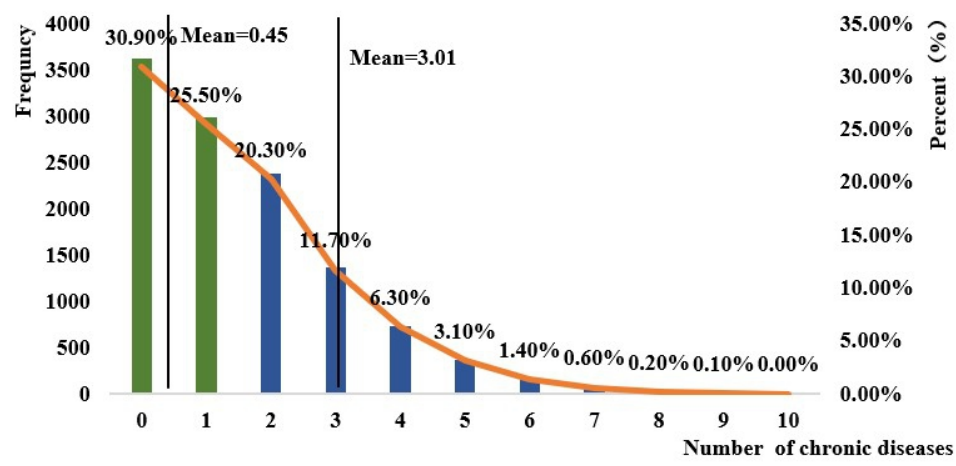

Figure 1. Frequency and percentage of people aged over 60 suffering from different diseases based on CHARLS data

211x107mm (96 x 96 DPI)

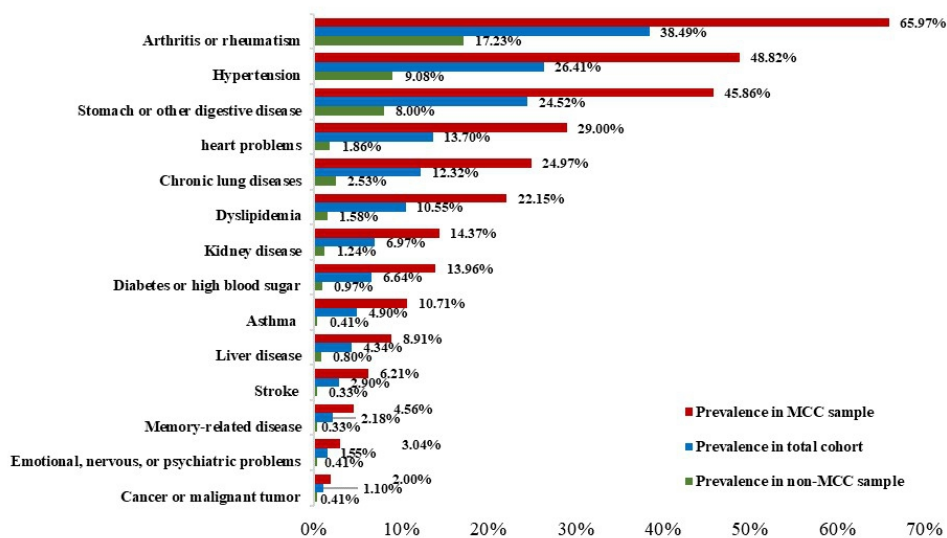

Figure 2. Prevalence rates of the chronic condition in elderly people over 60 years old based on CHARLS data.jpg

161x91mm (150 x 150 DPI)

**STROBE 2007 (v4) checklist of items to be included in reports of observational studies in epidemiology\***  
**Checklist for cohort, case-control, and cross-sectional studies (combined)**

| Section/Topic             | Item # | Recommendation                                                                                                                                                                                                                                                                                                                                                                                                                                                         | Reported on page # |
|---------------------------|--------|------------------------------------------------------------------------------------------------------------------------------------------------------------------------------------------------------------------------------------------------------------------------------------------------------------------------------------------------------------------------------------------------------------------------------------------------------------------------|--------------------|
| Title and abstract        | 1      | (a) Indicate the study's design with a commonly used term in the title or the abstract                                                                                                                                                                                                                                                                                                                                                                                 | 1                  |
|                           |        | (b) Provide in the abstract an informative and balanced summary of what was done and what was found                                                                                                                                                                                                                                                                                                                                                                    | 2                  |
| <b>Introduction</b>       |        |                                                                                                                                                                                                                                                                                                                                                                                                                                                                        |                    |
| Background/rationale      | 2      | Explain the scientific background and rationale for the investigation being reported                                                                                                                                                                                                                                                                                                                                                                                   | 4                  |
| Objectives                | 3      | State specific objectives, including any pre-specified hypotheses                                                                                                                                                                                                                                                                                                                                                                                                      | 4                  |
| <b>Methods</b>            |        |                                                                                                                                                                                                                                                                                                                                                                                                                                                                        |                    |
| Study design              | 4      | Present key elements of study design early in the paper                                                                                                                                                                                                                                                                                                                                                                                                                | 4                  |
| Setting                   | 5      | Describe the setting, locations, and relevant dates, including periods of recruitment, exposure, follow-up, and data collection                                                                                                                                                                                                                                                                                                                                        | 4                  |
| Participants              | 6      | (a) <i>Cohort study</i> —Give the eligibility criteria, and the sources and methods of selection of participants. Describe methods of follow-up<br><i>Case-control study</i> —Give the eligibility criteria, and the sources and methods of case ascertainment and control selection. Give the rationale for the choice of cases and controls<br><i>Cross-sectional study</i> —Give the eligibility criteria, and the sources and methods of selection of participants | 4                  |
|                           |        | (b) <i>Cohort study</i> —For matched studies, give matching criteria and number of exposed and unexposed<br><i>Case-control study</i> —For matched studies, give matching criteria and the number of controls per case                                                                                                                                                                                                                                                 | Not applicable     |
| Variables                 | 7      | Clearly define all outcomes, exposures, predictors, potential confounders, and effect modifiers. Give diagnostic criteria, if applicable                                                                                                                                                                                                                                                                                                                               | 5                  |
| Data sources/ measurement | 8*     | For each variable of interest, give sources of data and details of methods of assessment (measurement). Describe comparability of assessment methods if there is more than one group                                                                                                                                                                                                                                                                                   | 4                  |
| Bias                      | 9      | Describe any efforts to address potential sources of bias                                                                                                                                                                                                                                                                                                                                                                                                              | Not applicable     |
| Study size                | 10     | Explain how the study size was arrived at                                                                                                                                                                                                                                                                                                                                                                                                                              | 4                  |
| Quantitative variables    | 11     | Explain how quantitative variables were handled in the analyses. If applicable, describe which groupings were chosen and why                                                                                                                                                                                                                                                                                                                                           | 5                  |
| Statistical methods       | 12     | (a) Describe all statistical methods, including those used to control for confounding                                                                                                                                                                                                                                                                                                                                                                                  | 5                  |
|                           |        | (b) Describe any methods used to examine subgroups and interactions                                                                                                                                                                                                                                                                                                                                                                                                    | 5                  |
|                           |        | (c) Explain how missing data were addressed                                                                                                                                                                                                                                                                                                                                                                                                                            | Not applicable     |
|                           |        | (d) <i>Cohort study</i> —If applicable, explain how loss to follow-up was addressed<br><i>Case-control study</i> —If applicable, explain how matching of cases and controls was addressed                                                                                                                                                                                                                                                                              | 5                  |

|                          |     |                                                                                                                                                                                                              |                |
|--------------------------|-----|--------------------------------------------------------------------------------------------------------------------------------------------------------------------------------------------------------------|----------------|
|                          |     | <i>Cross-sectional study</i> —If applicable, describe analytical methods taking account of sampling strategy                                                                                                 |                |
|                          |     | (e) Describe any sensitivity analyses                                                                                                                                                                        | Not applicable |
| <b>Results</b>           |     |                                                                                                                                                                                                              |                |
| Participants             | 13* | (a) Report numbers of individuals at each stage of study—eg numbers potentially eligible, examined for eligibility, confirmed eligible, included in the study, completing follow-up, and analysed            | 4              |
|                          |     | (b) Give reasons for non-participation at each stage                                                                                                                                                         | Not applicable |
|                          |     | (c) Consider use of a flow diagram                                                                                                                                                                           | Not applicable |
| Descriptive data         | 14* | (a) Give characteristics of study participants (eg demographic, clinical, social) and information on exposures and potential confounders                                                                     | 6              |
|                          |     | (b) Indicate number of participants with missing data for each variable of interest                                                                                                                          | 5              |
|                          |     | (c) <i>Cohort study</i> —Summarise follow-up time (eg, average and total amount)                                                                                                                             | Not applicable |
| Outcome data             | 15* | <i>Cohort study</i> —Report numbers of outcome events or summary measures over time                                                                                                                          | Not applicable |
|                          |     | <i>Case-control study</i> —Report numbers in each exposure category, or summary measures of exposure                                                                                                         | Not applicable |
|                          |     | <i>Cross-sectional study</i> —Report numbers of outcome events or summary measures                                                                                                                           | 5              |
| Main results             | 16  | (a) Give unadjusted estimates and, if applicable, confounder-adjusted estimates and their precision (eg, 95% confidence interval). Make clear which confounders were adjusted for and why they were included | 6              |
|                          |     | (b) Report category boundaries when continuous variables were categorized                                                                                                                                    | 8              |
|                          |     | (c) If relevant, consider translating estimates of relative risk into absolute risk for a meaningful time period                                                                                             | 10             |
| Other analyses           | 17  | Report other analyses done—eg analyses of subgroups and interactions, and sensitivity analyses                                                                                                               | 6-12           |
| <b>Discussion</b>        |     |                                                                                                                                                                                                              |                |
| Key results              | 18  | Summarise key results with reference to study objectives                                                                                                                                                     | 12             |
| Limitations              | 19  | Discuss limitations of the study, taking into account sources of potential bias or imprecision. Discuss both direction and magnitude of any potential bias                                                   | 14             |
| Interpretation           | 20  | Give a cautious overall interpretation of results considering objectives, limitations, multiplicity of analyses, results from similar studies, and other relevant evidence                                   | 14             |
| Generalisability         | 21  | Discuss the generalisability (external validity) of the study results                                                                                                                                        | 14             |
| <b>Other information</b> |     |                                                                                                                                                                                                              |                |
| Funding                  | 22  | Give the source of funding and the role of the funders for the present study and, if applicable, for the original study on which the present article is based                                                | 14             |

\*Give information separately for cases and controls in case-control studies and, if applicable, for exposed and unexposed groups in cohort and cross-sectional studies.

**Note:** An Explanation and Elaboration article discusses each checklist item and gives methodological background and published examples of transparent reporting. The STROBE checklist is best used in conjunction with this article (freely available on the Web sites of PLoS Medicine at <http://www.plosmedicine.org/>, Annals of Internal Medicine at <http://www.annals.org/>, and Epidemiology at <http://www.epidem.com/>). Information on the STROBE Initiative is available at [www.strobe-statement.org](http://www.strobe-statement.org).



# BMJ Open

## Prevalence and patterns of multimorbidity among the elderly in China: a cross-sectional study using national survey data

|                                 |                                                                                                                                                                                                                                                                                                                                                                                                                                                                                                 |
|---------------------------------|-------------------------------------------------------------------------------------------------------------------------------------------------------------------------------------------------------------------------------------------------------------------------------------------------------------------------------------------------------------------------------------------------------------------------------------------------------------------------------------------------|
| Journal:                        | <i>BMJ Open</i>                                                                                                                                                                                                                                                                                                                                                                                                                                                                                 |
| Manuscript ID                   | bmjopen-2018-024268.R1                                                                                                                                                                                                                                                                                                                                                                                                                                                                          |
| Article Type:                   | Research                                                                                                                                                                                                                                                                                                                                                                                                                                                                                        |
| Date Submitted by the Author:   | 23-Oct-2018                                                                                                                                                                                                                                                                                                                                                                                                                                                                                     |
| Complete List of Authors:       | zhang, ran; China Pharmaceutical University, School of International Pharmaceutical Business<br>Lu, Yun; China Pharmaceutical University, School of International Pharmaceutical Business<br>Shi, Liuyan; China Pharmaceutical University, School of International Pharmaceutical Business<br>Zhang, SongLin; China Pharmaceutical University, School of International Pharmaceutical Business<br>Chang, Feng; China Pharmaceutical University, School of International Pharmaceutical Business |
| <b>Primary Subject Heading</b>: | Health informatics                                                                                                                                                                                                                                                                                                                                                                                                                                                                              |
| Secondary Subject Heading:      | Public health, Qualitative research                                                                                                                                                                                                                                                                                                                                                                                                                                                             |
| Keywords:                       | multimorbidity, cross-sectional study, Prevalence, Observed-to-expected ratio, China                                                                                                                                                                                                                                                                                                                                                                                                            |
|                                 |                                                                                                                                                                                                                                                                                                                                                                                                                                                                                                 |

SCHOLARONE™  
Manuscripts

1  
2  
3  
4 **Prevalence and patterns of multimorbidity among the elderly in**  
5  
6 **China: a cross-sectional study using national survey data**  
7  
8  
9

10  
11 **Corresponding author:** Feng Chang

12  
13 **Postal address:** 639 Longmian Road, Jiangning District, Nanjing, Jiangsu  
14  
15 Province, 211198

16  
17 **E-mail:** cpucf@163.com

18  
19 **telephone number:** +86-13805153128  
20  
21

22  
23 **First author:** Ran Zhang

24  
25 **E-mail:** ranzai7@126.com

26  
27 **Department:** China Pharmaceutical University

28  
29 **Institution:** School of International Pharmaceutical Business

30  
31 **City:** Nanjing, Jiangsu Province

32  
33 **Country:** China  
34  
35

36  
37 **Co-authors:** Yun Lu **E-mail:** luyun20159@163.com

38  
39 **Co-authors:** Liuyan Shi **E-mail:** juliasmithsly@163.com

40  
41 **Co-authors:** Songlin Zhang **E-mail:** 1069822493@qq.com

42  
43 **Department:** China Pharmaceutical University

44  
45 **Institution:** School of International Pharmaceutical Business

46  
47 **City:** Nanjing, Jiangsu Province

48  
49 **Country:** China  
50  
51

52  
53 **Keywords**

54  
55  
56 Multimorbidity; cross-sectional study; Prevalence; Observed-to-expected ratio; China  
57  
58

1  
2  
3  
4 **Word count 3853**  
5  
6  
7

8 **ABSTRACT**  
9

10 **Objectives:** Examination of the prevalence and patterns of multimorbidity among the  
11 elderly in China.  
12

13 **Design:** Cross-sectional study.  
14

15 **Setting:** More than 10,000 households in 28 of the 34 provinces of mainland China.  
16

17 **Participants:** 11,707 Chinese adults aged 60 and over.  
18

19 **Primary outcome measures:** Prevalence and patterns of multimorbidity among the  
20 participants. Relative risks were calculated to estimate the probability of up to 14 chronic  
21 conditions coexisting with each other. Observed-to-expected (O/E) ratios were used to  
22 analyze the patterns of multimorbidity.  
23  
24  
25  
26  
27

28 **Results:** Multimorbidity was present in 43.6% of respondents from the sample population,  
29 with women having the greater prevalence compared to men. There were 804 different  
30 comorbidity combinations identified, including 76 dyad combinations and 169 triad  
31 combinations. The top 10 morbidity dyads and triads accounted for 69.01% and 47.05% of  
32 the total dyad and triad combinations observed, respectively. Among the 14 chronic  
33 conditions included in the study, asthma, stroke, heart attack and six other chronic  
34 conditions were the main components of multimorbidity due to their high relative risk  
35 ratios. The most frequently occurring clusters with higher O/E ratios were stroke along  
36 with emotional, nervous, or psychiatric problems; memory-related diseases together  
37 emotional, nervous, or psychiatric problems; and memory-related diseases and asthma  
38 accompanied by chronic lung diseases and asthma.  
39  
40  
41  
42  
43  
44  
45  
46  
47  
48  
49

50 **Conclusions:** The results of this study highlight the high prevalence of multimorbidity in  
51 the elderly population in China. Further studies are required to understand the etiology of  
52 multimorbidity, and future primary healthcare policies should be made while taking  
53  
54  
55  
56

1  
2  
3  
4  
5  
6  
7  
8  
9  
10  
11  
12  
13  
14  
15  
16  
17  
18  
19  
20  
21  
22  
23  
24  
25  
26  
27  
28  
29  
30  
31  
32  
33  
34  
35  
36  
37  
38  
39  
40  
41  
42  
43  
44  
45  
46  
47  
48  
49  
50  
51  
52  
53  
54  
55  
56  
57  
58  
59  
60

multimorbidity into consideration.

For peer review only

## Strengths and limitations of this study

### Strengths

- This is the first study to estimate the prevalence and patterns of multimorbidity among the elderly population in China.
- Data for this study were collected from a nationally representative longitudinal survey of 17,708 Chinese residents.

### Limitations

- Only 14 predefined chronic diseases were included in the study, and these may not be comprehensive of the conditions of the population.
- The data analyzed from the CHARLS were originally collected by population self-reporting, not clinician evaluation, and could partially reflect some associated biases or confounds.
- The exclusion of incomplete data may cause a selection bias.

## INTRODUCTION

Multimorbidity, or the simultaneous occurrence of two or more chronic conditions in an individual, is becoming increasingly common, and this has been reported to increase progressively with age. [1, 2] At present, with China's aging population having an increasing prevalence of chronic conditions, multimorbidity among the elderly poses an enormous societal cost due to increased mortality rates and healthcare utilization. [3] However, to date, research on chronic conditions in China has focused on single disease states, and the coexistence of multiple chronic conditions has not been investigated systematically and thoroughly.

There is a significant difference in the etiological analysis between patients with single chronic conditions and those with multimorbidity. [4] The coexistence of chronic conditions in a patient is more than a random event, it is more typically due to the causal relationship between some diseases and shared pathogenic factors. [5, 6] Moreover, the interactions between diseases or between a disease and host result in differences in the severity of multimorbidity and functional status and prognosis of patients with multimorbidity. [7] Consequently, it is imperative to begin research on multimorbidity in China for the cost-effective treatments that the results may help to suggest. [8] The purpose of this study was therefore to determine the prevalence of multimorbidity among the elderly in China and to reveal morbidity combinations, which may benefit the design and implementation of a modified healthcare system with consideration for patients with multimorbidity.

## METHODS

### Data source

Data for this study were collected from the third response of the China Health and Retirement Longitudinal Survey (CHARLS), which is the most current data available. The CHARLS is a nationally representative longitudinal survey of Chinese residents aged 45

1  
2  
3 and older that was conducted by the Chinese Center for Disease Control and Prevention,  
4 along with Peking University, to help China to adjust to the rapid aging of its population  
5 through the evaluation of social, economic, and health circumstances on the community  
6 level using data collected by interviews, physical measurements and blood sample  
7 collection. [9] The national baseline survey began in 2011 and involved 17,708 respondents  
8 from 150 county-level units, 450 village-level units, and approximately 10,000 households.  
9 Afterwards, CHARLS respondents were followed every second year, with their informed  
10 consent, and the study was approved by the Peking University Biomedical Ethics  
11 Committee (IRB00001052-14013-exemption).  
12  
13  
14  
15  
16  
17  
18  
19

## 20 **Variables**

21  
22 The core CHARLS questionnaires included sections requesting information on  
23 demographic factors, family structure and changes, health status and functioning,  
24 healthcare and insurance, work, retirement and pension, income and consumption, and  
25 assets (individual and household). Information was collected by interview by trained staff.  
26 For the current study, the eligible and included participants were determined by being aged  
27 60 and over, and data on gender, age and health status was used from the general health  
28 status and disease history section of senior citizens in the 2015 CHARLS data. This  
29 information included the following 14 common chronic health problems: hypertension,  
30 dyslipidemia (high blood lipids or low cholesterol), diabetes or elevated blood glucose  
31 (including impaired glucose tolerance and fasting blood glucose), cancer (excluding mild  
32 skin cancers), chronic lung disease such as chronic bronchitis or emphysema, pulmonary  
33 heart disease (excluding tumors or cancer), liver disease (other than fatty liver, tumors, or  
34 cancer), heart disease (such as myocardial infarction, coronary heart disease, angina  
35 pectoris, congestive heart failure and other heart diseases), stroke, kidney disease  
36 (excluding tumors or cancer), stomach or other digestive diseases (excluding tumors or  
37 cancer), emotional and mental problems, memory-related diseases (such as Alzheimer's  
38 disease, brain atrophy, Parkinson's disease), arthritis or rheumatism, and asthma. All these  
39 data were based on self-reports. Accordingly, multimorbidity was defined as the  
40 coexistence of more than one of the 14 chronic conditions, with acute or subacute forms of  
41 certain conditions being excluded in this study due to the CHARLS data collection protocol.  
42  
43  
44  
45  
46  
47  
48  
49  
50  
51  
52  
53  
54  
55  
56

## Statistical analysis

To detect the demographic characteristics of patients with multimorbidity, respondents were divided into two groups: those with multiple chronic conditions (MCC group) and those without multiple chronic conditions (Non-MCC group). Descriptive statistics were calculated and expressed as means (SD) and frequencies (percentage). We applied the T<sup>2</sup> and  $\chi^2$  tests to test the differences in age, gender and the mean number of chronic conditions across different subgroups. Respective prevalence in the MCC group and the non-MCC group were calculated separately.

To determine the most common combination of chronic diseases, the prevalence of morbidity and multimorbidity dyads and triads were estimated, respectively. Next, the expected number of patients with a chronic disease were calculated, and the observed-to-expected (O/E) ratios were determined by dividing the number of patients in those groups by the expected number of patients. Observed-to-expected ratios were used to estimate the conditional probability of coexistence of two or three chronic conditions. [10] As an important indicator for assessing the correlation between diseases, the O/E ratio has been used in many areas of comorbidity. [10, 11] The relative risk of comorbidity for individual chronic conditions was also calculated. Relative risk of comorbidity (RR) is the ratio of the number of people with a certain chronic condition who suffer from multimorbidity to the number of patients with the same disease who do not suffer from multimorbidity. [11, 12] In other words, a higher RR value means a higher probability that the disease coexists with other diseases. However, it should be noted that there is no direct relationship between the relative risk of comorbidity and the overall prevalence of the diseases. [13, 14]

All analyses in this study were completed using Stata software V.14.0 for Windows (Stata Corp). P Values <0.05 were considered to be statistically significant.

## Patient and public involvement

Patients and the public were not involved in the development of the research question or outcome measures of the study, nor were they involved in study design and execution. There are no plans to disseminate the research results to study participants.



## RESULTS

### Characteristics of participants

The data were gathered from the third response set of CHARLS. After exclusion of participants with incomplete data (1,002) and aged under 60 (9,259), there were 11,707 respondents with available information on related chronic diseases that were included in this study. The selection process of study sample is shown in Figure 1. The demographic characteristics of sample respondents and statistical significance test results are presented in Table 1.

Overall, the mean age for the sample population was 70.5 (ranging from 60 to 107). The sample population consisted of 5,705 (48.7%) males and 6002 (51.2%) females, and 43.6% of them suffered from multimorbidity. The median of chronic conditions in the MCC group was 3.01, compared to 0.45 in the Non-MCC group. Samples in the MCC group were 0.66 year older than those belonged to the non-MCC group. Gender differences with regard to the age of samples between the MCC group and the non-MCC group (70.57 for MCC group and 69.91 for non-MCC group) were small but statistically significant ( $p < 0.001$ ). The prevalence of multimorbidity in the female population was higher than that for the males (54.41% vs 45.59%), which is in accordance with trends reported in other available literature. [15, 16] Figure 2 shows the number and proportion of respondents over 60 according to morbidity numbers. It can be seen that among all the participants aged over 60, 43.6% suffer from multimorbidity. Considering that only 30.9% of the respondents did not have the 14 chronic diseases, and 43.7% of them had two or more chronic diseases, multimorbidity would be a major problem faced by the health care system.

**Table 1. Demographic characteristics of all respondents, the MCC group and non-MCC group**

|                  | All respondent | MCC group | Non-MCC group | P* |
|------------------|----------------|-----------|---------------|----|
| Number of people | 11707          | 5107      | 6600          |    |
| Proportion (%)   | 100%           | 43.62%    | 56.38%        |    |
| Mean age         |                |           |               |    |

|                                   |              |              |              |        |
|-----------------------------------|--------------|--------------|--------------|--------|
| All respondents (SD)              | 70.20(7.907) | 70.57(7.701) | 69.91(8.051) | <0.001 |
| <b>Male</b> (SD)                  | 69.97(7.575) | 70.50(7.348) | 69.60(7.707) | <0.001 |
| <b>Female</b> (SD)                | 70.39(8.189) | 70.62(7.892) | 70.19(8.359) | <0.001 |
| Gender (% females)                | 51.28%       | 54.41%       | 48.83%       | <0.001 |
| Mean number of chronic conditions |              |              |              |        |
| All respondents (SD)              | 1.57(1.560)  | 3.01(1.259)  | 0.45(0.498)  | <0.001 |
| <b>Male</b> (SD)                  | 1.47(1.534)  | 2.98(1.265)  | 0.44(0.496)  | <0.001 |
| <b>Female</b> (SD)                | 1.65(1.581)  | 3.03(7.982)  | 0.47(0.499)  | <0.001 |

SD = standard deviation;  
p\* = statistical significance of the difference between the MCC and the non-MCC sample (t-tests were performed for comparison of means, and chi-square-tests for differences between percentages)

### Prevalence of chronic conditions

The prevalence of chronic conditions in the entire sample, the MCC group and the non-MCC group are shown in [Figure 3](#). The prevalence of all fourteen chronic conditions in the MCC group was significantly higher than that in the entire sample. For instance, the prevalence of arthritis or rheumatism, hypertension, stomach or other digestive disease, heart disease and chronic lung disease were 65.97%, 48.82%, 45.86%, 29.00% and 24.97% in the MCC group, compared to 38.49%, 26.41%, 24.52%, 12.32% and 12.32% in the entire sample, respectively.

[Table 2](#) shows the relative risks of comorbidity determined for the 14 chronic diseases reported in this study. It can be seen that the overall relative risks for asthma, stroke, heart disease and six other conditions were all above 10, which meant these diseases were >10 times easier to coexist with other chronic conditions and result in multimorbidity. In addition, the relative risks for certain diseases were positively associated with gender. For example, men had significantly higher relative risks for asthma, but lower relative risks for diabetes or high blood sugar, compared to women.

**Table 2 Relative risks of multimorbidity for different chronic conditions according to gender**

1

2

3

4

5

6

7

8

9

10

11

12

13

14

15

16

17

18

19

20

21

22

23

24

25

26

27

28

29

30

31

32

33

34

35

36

37

38

39

40

41

42

43

44

45

46

47

48

49

50

51

52

53

54

55

56

57

58

59

60

| Chronic conditions                          | All respondents | 95% Confidence Interval                     |             | Female | 95% Confidence Interval |             | Male  | 95% Confidence Interval |             |
|---------------------------------------------|-----------------|---------------------------------------------|-------------|--------|-------------------------|-------------|-------|-------------------------|-------------|
|                                             |                 | Lower Bound                                 | Upper Bound |        | Lower Bound             | Upper Bound |       | Lower Bound             | Upper Bound |
|                                             |                 | <b>High relative risk of multimorbidity</b> |             |        |                         |             |       |                         |             |
| Asthma                                      | 26.18           | 17.82                                       | 38.46       | 20.67  | 11.85                   | 36.06       | 32.68 | 19.18                   | 55.67       |
| Stroke                                      | 18.62           | 12.11                                       | 28.64       | 21.57  | 10.61                   | 43.86       | 17.43 | 10.13                   | 29.99       |
| Heart disease                               | 15.56           | 12.99                                       | 18.63       | 16.48  | 12.80                   | 21.21       | 14.26 | 11.02                   | 18.46       |
| Diabetes or high blood sugar                | 14.40           | 11.18                                       | 18.55       | 15.68  | 10.86                   | 22.63       | 13.11 | 9.24                    | 18.62       |
| Dyslipidemia                                | 14.05           | 11.54                                       | 17.12       | 15.13  | 11.37                   | 20.14       | 12.97 | 9.86                    | 17.05       |
| Memory-related disease                      | 13.69           | 8.85                                        | 21.16       | 34.17  | 12.63                   | 92.44       | 9.28  | 5.66                    | 15.21       |
| Kidney disease                              | 11.57           | 9.24                                        | 14.49       | 15.01  | 10.17                   | 22.43       | 10.24 | 7.78                    | 13.48       |
| Liver disease                               | 11.10           | 8.37                                        | 14.71       | 16.07  | 9.70                    | 26.63       | 9.15  | 6.49                    | 12.89       |
| Chronic lung diseases                       | 9.87            | 8.43                                        | 11.55       | 10.71  | 8.26                    | 13.88       | 9.74  | 8.00                    | 11.86       |
| <b>Low relative risk of multimorbidity</b>  |                 |                                             |             |        |                         |             |       |                         |             |
| Emotional, nervous, or psychiatric problems | 7.42            | 4.94                                        | 11.15       | 6.24   | 3.78                    | 10.30       | 9.36  | 4.65                    | 18.85       |
| Stomach or other digestive disease          | 5.73            | 5.25                                        | 6.25        | 6.20   | 5.48                    | 7.02        | 5.23  | 4.62                    | 5.91        |
| Hypertension                                | 5.38            | 4.96                                        | 5.84        | 4.90   | 4.40                    | 5.47        | 5.92  | 5.24                    | 6.69        |
| Cancer or malignant tumor                   | 4.88            | 3.20                                        | 7.45        | 5.33   | 3.06                    | 9.29        | 3.99  | 2.07                    | 7.72        |
| Arthritis or rheumatism                     | 3.83            | 3.61                                        | 4.05        | 3.70   | 3.43                    | 3.99        | 3.91  | 3.59                    | 4.26        |

### Common multimorbidity combinations

There were 804 possible comorbidity combinations that were identified in the MCC group after statistical analysis, including 72 dyads and 169 triads. The 10 most frequently occurring morbidity dyads and triads are presented respectively in [Table 3](#) and [Table 4](#).

**Table 3** Prevalence of the 10 most common morbidity dyads

| Rank | Morbidity dyads | Prevalence      |        |      | Mean Age |
|------|-----------------|-----------------|--------|------|----------|
|      |                 | All respondents | female | male |          |

|    |                                                                |       |       |       |       |
|----|----------------------------------------------------------------|-------|-------|-------|-------|
| 1  | Arthritis or rheumatism and Stomach or other digestive disease | 4.73% | 3.56% | 5.96% | 69.20 |
| 2  | Arthritis or rheumatism and Hypertension                       | 2.85% | 2.20% | 3.53% | 71.25 |
| 3  | Arthritis or rheumatism and Chronic lung diseases              | 1.13% | 1.22% | 1.04% | 71.55 |
| 4  | Hypertension and heart problems                                | 1.03% | 1.00% | 1.06% | 71.80 |
| 5  | Hypertension and Stomach or other digestive disease            | 0.89% | 0.83% | 0.95% | 69.07 |
| 6  | Hypertension and Dyslipidemia                                  | 0.86% | 0.81% | 0.91% | 68.58 |
| 7  | Arthritis or rheumatism and heart problems                     | 0.76% | 0.53% | 1.00% | 70.72 |
| 8  | Arthritis or rheumatism and Kidney disease                     | 0.64% | 0.73% | 0.54% | 68.24 |
| 9  | Hypertension and Diabetes or high blood sugar                  | 0.58% | 0.50% | 0.67% | 70.97 |
| 10 | Chronic lung diseases and Asthma                               | 0.53% | 0.65% | 0.40% | 71.15 |

**Table 4** Prevalence of the 10 most common morbidity triads

| Rank | Morbidity triads                                                                      | Prevalence      |        |       | Mean Age |
|------|---------------------------------------------------------------------------------------|-----------------|--------|-------|----------|
|      |                                                                                       | All respondents | female | male  |          |
| 1    | Arthritis or rheumatism, Stomach or other digestive disease and Hypertension          | 1.19%           | 0.80%  | 1.60% | 70.96    |
| 2    | Arthritis or rheumatism, Stomach or other digestive disease and Chronic lung diseases | 0.82%           | 0.97%  | 0.67% | 70.82    |
| 3    | Arthritis or rheumatism, Heart disease and Hypertension                               | 0.63%           | 0.37%  | 0.91% | 69.93    |
| 4    | Arthritis or rheumatism, Heart disease and Stomach or other digestive disease         | 0.59%           | 0.25%  | 0.95% | 71.51    |

|    |                                                                                   |       |       |       |       |
|----|-----------------------------------------------------------------------------------|-------|-------|-------|-------|
| 5  | Hypertension, Dyslipidemia and Arthritis or rheumatism                            | 0.44% | 0.31% | 0.57% | 70.13 |
| 6  | Hypertension, Dyslipidemia<br>and Heart problems                                  | 0.42% | 0.35% | 0.49% | 71.17 |
| 7  | Arthritis or rheumatism, Kidney disease and Stomach or<br>other digestive disease | 0.42% | 0.40% | 0.44% | 70.14 |
| 8  | Arthritis or rheumatism, Asthma and Chronic lung diseases                         | 0.40% | 0.46% | 0.33% | 69.18 |
| 9  | Hypertension, Dyslipidemia and Diabetes or high blood<br>sugar                    | 0.35% | 0.35% | 0.35% | 71.51 |
| 10 | Arthritis or rheumatism, Stomach or other digestive disease<br>and Liver disease  | 0.53% | 0.57% | 0.49% | 70.29 |

Theoretically, there are 91 dyad combinations and 364 triad combinations possible given the 14 different chronic conditions considered in this study. However, only 72 types (79.12%) of dyads and 169 types (46.43%) of triads emerged in the sample. The 10 most frequently occurring morbidity dyads accounted for 69.01% of the 72 dyad combinations, and the proportion of the 10 most common triad combinations in the 169 triad combinations was 47.05%. Arthritis or rheumatism, which appeared in five of the top 10 dyad combinations and eight of the top 10 triad combinations of chronic conditions, was the main component of the leading morbidity dyads and triads.

There were significant gender differences observed in the occurrences of these multimorbidity combinations. The numbers of women with triad combinations of chronic diseases were generally higher than for men with the same morbidity triads. For example, women had significantly higher prevalence of arthritis and hypertension and hyperlipidemia than men (78.26% vs 21.74%). Among morbidity dyads, the prevalence of heart disease and arthritis or rheumatism in women was nearly two times higher than that in men, while the cluster of arthritis or rheumatism and kidney disease occurred more frequently in men than in women. No age difference was detected in the probability of

these particular multimorbidity combinations occurring.

The O/E ratio was also used to analyze the multimorbidity pattern. [17] The higher the O/E value, the higher the probability of coexistence of chronic conditions. [18] Table 5 shows O/E ratios determined for the 10 most prevalent morbidity dyads and triads. The prevalence of each conditions and the dyad and triad prevalence are presented in Annex 1. In the midst of those triad combinations of chronic conditions, the two clusters with significantly higher O/E ratios were emotional, nervous, or psychiatric problems and stroke and memory-related disease (O/E ratio = 10287.72), emotional, nervous, or psychiatric problems and memory-related disorders and asthma (O/E ratio = 8498.56). These four conditions also dominated the three leading dyads with the highest O/E ratios: 97.73 for the combination of emotional and mental disorders and memory- related diseases, 23.66 for the combination of stroke and memory related disease and 19.55 for the combination of memory-related disease and asthma.

**Table 5 O/E ratios for the 10 most prevalent morbidity dyads and triads**

| Number of chronic conditions | Rank | Chronic conditions                                                     | O/E ratio |
|------------------------------|------|------------------------------------------------------------------------|-----------|
| 2                            | 1    | Chronic lung diseases and Asthma                                       | 162.15    |
|                              | 2    | Emotional, nervous, or psychiatric problems and Memory-related disease | 97.73     |
|                              | 3    | Dyslipidemia and Diabetes or high blood sugar                          | 38.39     |
|                              | 4    | Heart disease and Memory-related disease                               | 25.69     |
|                              | 5    | Stroke and Memory-related disease                                      | 23.66     |
|                              | 6    | Hypertension and Stroke                                                | 22.85     |
|                              | 7    | Hypertension and Diabetes or high blood sugar                          | 20.64     |
|                              | 8    | Cancer or malignant tumor and Stroke                                   | 19.55     |
|                              | 9    | Memory-related disease and Asthma                                      | 19.55     |

|          |    |                                                                                |          |
|----------|----|--------------------------------------------------------------------------------|----------|
|          | 10 | Stroke and Asthma                                                              | 19.55    |
| <b>3</b> | 1  | Stroke, Emotional, nervous, or psychiatric problems and Memory-related disease | 10287.72 |
|          | 2  | Emotional, nervous, or psychiatric problems, Memory-related disease and Asthma | 8498.56  |
|          | 3  | Emotional, nervous, or psychiatric problems, Chronic lung diseases and Asthma  | 2274.26  |
|          | 4  | Heart disease, Stroke and Memory-related disease                               | 2253.50  |
|          | 5  | Chronic lung diseases, Heart disease and Asthma                                | 1992.69  |
|          | 6  | Dyslipidemia, Heart disease and Memory-related disease                         | 1443.25  |
|          | 7  | Hypertension, Dyslipidemia and Diabetes or high blood sugar                    | 1398.31  |
|          | 8  | Hypertension, Stroke and Memory-related disease                                | 1387.35  |
|          | 9  | Chronic lung diseases, Memory-related disease and Asthma                       | 1376.53  |
|          | 10 | Chronic lung diseases, Arthritis or rheumatism and Asthma                      | 1265.95  |

## DISCUSSION

This is the first study to estimate the prevalence and patterns of multimorbidity among the elderly in China based on the nationally representative data from CHARLS, which covered 11,707 Chinese senior citizens of age 60 and over. The results of the study indicated that the prevalence of the 14 chronic diseases evaluated in the elderly reached 69.10% in China, and that 43.6% of the elderly population suffered from multimorbidity. The average age of the MCC group was 0.66 years higher than that of the non-MCC group and in the MCC group, the mean age of women was 0.66 years higher than that of men, which was comparable to the results of previous studies. [19-23]

1  
2  
3  
4 The prevalence of multimorbidity estimated in this study was much lower than that from  
5 previous studies in other developed countries. For example, a study of 543 patients over  
6 age 65 in Ghent, Belgium showed that the multimorbidity rate was as high as 82.6%, [24].  
7  
8 Another study in Australia showed that 83.2% of the respondents suffered from  
9 multimorbidity. [25] However, it is difficult to compare the prevalence generated from  
10 different studies due to differences in the selected definitions of multimorbidity,  
11 demographic characteristics of the samples, and different study methodologies. [26-30]  
12  
13

14  
15  
16 In agreement with previous reports, arthritis or rheumatism, hypertension, stomach or  
17 other digestive disease were the most common diseases in the MCC group. [11] The  
18 prevalence of these three conditions was each above 20% in the entire sample, and above  
19 45% in the MCC group. The most prevalent chronic combinations in the sample could also  
20 be found in other studies. [24] The results of this study showed that the prevalence of  
21 arthritis or rheumatism was high and easy to coexist with other conditions. In addition to  
22 the chronic conditions mentioned above, previous studies demonstrated that women with  
23 rheumatoid arthritis might have a predisposition to gallstones which could manifest in  
24 middle or older age compared with women in the general population. This phenomenon  
25 could be related to chronic inflammation and HDL metabolism. [31]  
26  
27  
28  
29  
30  
31  
32  
33  
34  
35  
36  
37

38 Although arthritis or rheumatism, a component of all the leading three morbidity dyads  
39 and triads, was also the most commonly occurring disease in multimorbidity, the relative  
40 risk of this disease was only 4.65, the lowest in the 14 chronic diseases. Moreover, arthritis  
41 or rheumatism is less common in morbidity clusters with large O/E ratios. Therefore, the  
42 frequent occurrence of arthritis or rheumatism in multimorbidity might be simply due to  
43 the high prevalence of the disease.  
44  
45  
46  
47  
48  
49

50 The relative risks for asthma, stroke, heart disease, and six other conditions were all  
51 above 10, which means that patients with these diseases were 10 times more likely to be  
52 afflicted by multimorbidity. These diseases also occurred at a high frequency in  
53  
54  
55  
56



1  
2  
3  
4 multimorbidity with high O/E ratios, such as the clusters of pulmonary disease and asthma,  
5  
6 emotional and mental illness and memory-related disease, dyslipidemia and diabetes, and  
7  
8 stroke and emotional or mental illness and memory-related disease. Patients with these  
9  
10 diseases were more likely to express comorbidity compared to those without these diseases,  
11  
12 and thus should be the focus of future research studies.

13  
14 This study featured a nationally representative sample of the Chinese elderly population,  
15  
16 which was crucial to get an overall understanding of multimorbidity among the elderly in  
17  
18 China. However, there were also limitations with the data sample and study. For example,  
19  
20 this study used data from the third wave report of CHARLS, a survey which was conducted  
21  
22 in 2015, and there is accordingly a time lag to now that exists. Additionally, the chronic  
23  
24 diseases included in the study were not comprehensive, since only 14 chronic conditions  
25  
26 were included in the survey. Finally, the data obtained from the survey was based on self-  
27  
28 reporting, which may have introduced some misclassification bias or other confounds.  
29  
30 Later research on the prevalence and patterns of multimorbidity should be carried out in-  
31  
32 depth with a more extensive survey of chronic disease.  
33  
34  
35

## 36 CONCLUSIONS

37  
38 Multimorbidity remains an underexplored area of research in China. [32]. Despite the  
39  
40 increasing prevalence of multimorbidity, there are no specific proposals for its diagnosis  
41  
42 and treatment. [33] This study contributes to the understanding of the prevalence and  
43  
44 patterns of comorbidity among the elderly in China. Considering China's aging population  
45  
46 and the high prevalence of comorbidity in senior citizens, the elderly should be prioritized  
47  
48 in the fields of disease prevention and health promotion.  
49  
50  
51  
52  
53

54 **Acknowledgements** The authors would like to thank the Chinese Center for Disease  
55  
56

1  
2  
3  
4 Control and Prevention and Peking University for access to China Health and Retirement  
5  
6 Longitudinal Survey data.

7  
8 **Contributors** Ran Zhang analyzed and interpreted data, drafted the manuscript, approved  
9  
10 the final manuscript as submitted. Yun Lu revised the manuscript for important intellectual  
11  
12 content. Liuyan Shi analyzed and interpreted data and revised the manuscript for important  
13  
14 intellectual content. Songlin Zhang handled and solved the data problems, analyzed and  
15  
16 revised the data. Feng Chang helped on the study design and revised the manuscript.

17  
18 **Funding** This work was funded by the National Natural Science Foundation of China  
19  
20 (7167030838).

21  
22 **Competing interests** None declared.

23  
24 **Patient consent** Obtained.

25  
26 **Ethics approval** The original CHARLS was approved by the ethics review committee of  
27  
28 Peking University, and all participants gave written informed consent at the time of  
29  
30 participation

31  
32 **Data sharing statement** No additional data are available

## 33 34 35 36 REFERENCES

- 37  
38 1. Barnett K, Mercer SW, Norbury M, et al. Epidemiology of multimorbidity and  
39  
40 implications for health care, research, and medical education: a cross-sectional study.  
41  
42 *Lancet* 2012; 380:37–43.doi:10.1016/S0140-6736(12)60240-2  
43  
44 2. World Health Organization. Global status report on noncommunicable diseases,  
45  
46 2014.http://apps.who.int/nmh/publications/ncd-status-report-2014/en/index.html  
47  
48 (accessed 27 Oct 2017)  
49  
50 3. Lee J T, Hamid F, Pati S, et al. Impact of Noncommunicable Disease Multimorbidity  
51  
52 on Healthcare Utilisation and Out-Of-Pocket Expenditures in Middle-Income  
53  
54 Countries: Cross Sectional Analysis. *PLoS One* 2015;10:103-110. doi:  
55  
56

- 1  
2  
3  
4 10.1371/journal.pone.0127199  
5  
6 4. Moffat K, Mercer SW. Challenges of managing people with multimorbidity in today's  
7 healthcare systems. *BMC Fam Pract* 2015;16:129.doi: 10.1186/s12875-015-0344-4  
8  
9  
10 5. Schäfer Ingmar, von Leitner Eike-Christin, Schön Gerhard et al. Multimorbidity  
11 patterns in the elderly: a new approach of disease clustering identifies complex  
12 interrelations between chronic conditions. *PLoS One* 2010;12:e15941.doi:  
13 10.1371/journal.pone.0015941  
14  
15  
16 6. Atun R. Transitioning health systems for multimorbidity. *Lancet* 2015;386:721–2.doi:  
17 10.1016/S0140-6736(14)62254-6  
18  
19  
20 7. Wolff JL, Starfield B, Anderson G. Prevalence, expenditures, and complications of  
21 multiple chronic conditions in the elderly. *Arch Intern Med* 2002;20: 2269-2276.doi:  
22 10.1001/archinte.162.20.2269  
23  
24  
25 8. Yang L, Wu M, Cui B, et al. Economic burden of cardiovascular diseases in China.  
26 *Expert Rev Pharmacoecon Outcomes Res* 2008;8:349–56.doi:  
27 10.1586/14737167.8.4.349  
28  
29  
30 9. Zhao Y, Hu Y, Smith JP, et al. Cohort profile: the China Health and Retirement  
31 Longitudinal Study (CHARLS). *Int J Epidemiol* 2014;1:61-69.doi: 10.1093/ije/dys203  
32  
33  
34 10. Van den Bussche H, Koller D, Kolonko T, et al. Which chronic diseases and disease  
35 combinations are specific to multimorbidity in the elderly? Results of a claims data  
36 based cross-sectional study in Germany. *BMC Public Health* 2011;11:101-110.doi:  
37 10.1186/1471-2458-11-101  
38  
39  
40 11. Viera AJ. Odds ratios and risk ratios: what's the difference and why does it matter?  
41 *South Med J* 2008; 7: 30-34.doi:10.1097/SMJ.0b013e31817a7ee4  
42  
43  
44 12. Vettore MV, Meira GF, Rebelo MA et al. Multimorbidity patterns of oral clinical  
45 conditions, social position, and oral health-related quality of life in a population-based  
46 survey of 12-yr-old children. *Eur J Oral Sci.* 2016 ; 6:580-590. doi:  
47  
48  
49  
50  
51  
52  
53  
54  
55  
56  
57  
58  
59  
60

- 1  
2  
3  
4 10.1111/eos.12304. Epub 2016 Oct 8.  
5  
6 13. Zhang J, Yu KF. What's the relative risk? A method of correcting the odds ratio in  
7 cohort studies of common outcomes. *JAMA* 1998;19:1690-1691.doi:  
8 10.1001/jama.280.19.1690  
9  
10  
11  
12 14. McNutt LA, Wu C, Xue X, et al. Estimating the Relative Risk in Cohort Studies and  
13 Clinical Trials of Common Outcomes. *Am J Epidemiol* 2003;10:940-943.doi:  
14 10.1002/cncr.30192  
15  
16  
17  
18 15. Zhao, Shuyan. An Exploration of the Underlying Causes for Formation that a Gap  
19 between Chinese Woman's and Man's Life Expectancy is Narrower than World  
20 Average. *Ssrn Electronic Journal* 2014; 2: 212-221.doi:10.2139/ssrn.2410569  
21  
22  
23  
24 16. Crimmins EM, Kim JK, Solé-Auró A. Gender differences in health: results from  
25 SHARE, ELSA and HRS. *Eur J Public Health* 2011;21:81-91.doi:  
26 10.1093/eurpub/ckq022  
27  
28  
29  
30 17. Marengoni A, Rizzuto D, Wang HX, et al. Patterns of chronic multimorbidity in the  
31 elderly population. *J Am Geriatr Soc* 2009;57:225-30.doi:10.1111/j.1532-  
32 5415.2008.02109.x  
33  
34  
35  
36 18. Best WR, Cowper DC. The Ratio of Observed-to-Expected Mortality as a Quality of  
37 Care Indicator in Non-Surgical VA Patients. *Med Care* 1994;4:390-400.doi:  
38 10.1097/00005650-199404000-00007  
39  
40  
41  
42 19. Kastenholz KE, Weis M, Hagelstein C, et al. Correlation of Observed-to-Expected MRI  
43 Fetal Lung Volume and Ultrasound Lung-to-Head Ratio at Different Gestational Times  
44 in Fetuses With Congenital Diaphragmatic Hernia. *AJR Am J Roentgenol* 2016;4:856-  
45 866.doi:10.2214/AJR.15.15018  
46  
47  
48  
49  
50 20. Melis R, Marengoni A, Angleman S, et al. Incidence and predictors of multimorbidity  
51 in the elderly: a population-based longitudinal study. *PLoS One* 2014; 9:  
52 e103120.doi:10.1371/journal.pone.0103120  
53  
54  
55  
56  
57  
58  
59  
60

- 1  
2  
3  
4 21. Laan W, Bleijenberg N, Drubbel I, et al. Factors associated with increasing functional  
5 decline in multimorbid independently living older people. *Maturitas* 2013; 75: 276–  
6 81.doi:10.1016/j.maturitas.2013.04.005  
7  
8  
9  
10 22. Eckerblad J, Theander K, Ekdahl A, et al. To adjust and endure: a qualitative study of  
11 symptom burden in older people with multimorbidity. *Appl Nurs Res* 2015;28:322–  
12 7.doi:10.1016/j.apnr.2015.03.008  
13  
14  
15  
16 23. Wister A, Kendig H, Mitchell B, et al. Multimorbidity, health and aging in Canada and  
17 Australia: a tale of two countries. *BMC Geriatr*2016;1:163-176.doi: 10.1186/s12877-  
18 016-0341-z  
19  
20  
21  
22 24. Afshar S, Roderick PJ, Kowal P, et al. Multimorbidity and the inequalities of global  
23 ageing: a cross-sectional study of 28 countries using the World Health Surveys. *BMC*  
24 *Public Health*2015;15:776-786.doi:10.1186/s12889-015-2008-7  
25  
26  
27  
28 25. Boeckxstaens P, Peersman W, Goubin G, et al. A practice-based analysis of  
29 combinations of diseases in patients aged 65 or older in primary care. *BMC Family*  
30 *Practice* 2014;1:1-6.doi: 10.1186/1471-2296-15-159.  
31  
32  
33 26. Britt HC , Harrison CM , Miller GC , et al . Prevalence and patterns of  
34 multimorbidity in Australia. *Med J Aust* 2008;2: 72-77  
35  
36  
37 27. Glynn LG , Valderas JM , Healy P , et al . The prevalence of multimorbidity in primary  
38 care and its effect on health care utilization and cost. *Fam Pract* 2011;28:516–  
39 23.doi:10.1093/fampra/cmz013  
40  
41  
42 28. Marengoni A , Angleman S , Melis R , et al . Aging with multimorbidity: a systematic  
43 review of the literature. *Ageing Res Rev* 2011;10:430–9.doi:10.1016/j.arr.2011.03.003  
44  
45  
46 29. Barnett K , Mercer SW , Norbury M , et al . Epidemiology of multimorbidity and  
47 implications for health care, research, and medical education: a cross-sectional study.  
48 *Lancet* 2012;380:37–43.doi:10.1016/S0140-6736(12)60240-2  
49  
50  
51 30. Fortin M , Stewart M , Poitras ME , et al . A systematic review of prevalence studies  
52 on multimorbidity: toward a more uniform methodology. *Ann Fam Med* 2012;10:142–  
53 51.doi:10.1370/afm.1337.  
54  
55  
56 31. García-Gómez M C, De L E, Ordoñez-Palau S, et al. High Prevalence of Gallstone

1  
2  
3  
4 Disease in Rheumatoid Arthritis: A New Comorbidity Related to Dyslipidemia? [J].  
5 *Reumatol Clin*, 2017;14:294-300. doi: 10.1016/j.reuma.2018.03.012.  
6

7  
8 32. Bao W, Hu D, Shi X, et al. Comorbidity increased the risk of falls in Chinese older  
9 adults: A cross-sectional study. *Int J Clin Exp Med*,2017;7:10753-10763.  
10

11  
12 33. Gao N, Yuan Z, Tang X, et al. Prevalence of CHD-related metabolic comorbidity of  
13 diabetes mellitus in Northern Chinese adults: the REACTION study. *J Diabetes*  
14 *Complications*2016;2:199-205.doi:10.1016/j.jdiacomp.2015.11.018  
15  
16  
17  
18  
19  
20  
21

22 **Figure 1 Flowchart for selecting the study sample from the original sample population.**  
23 **CHARLS, China Health and Retirement Longitudinal Survey**  
24  
25  
26  
27

28 **Figure 2 Frequency and percentage of people aged over 60 suffering from different**  
29 **diseases based on CHARLS data**  
30  
31  
32  
33

34 **Figure 3 Prevalence Rates of 14 common chronic diseases in Chinese people over 60**  
35 **years old based on CHARLS data.**  
36  
37  
38  
39  
40  
41  
42  
43  
44  
45  
46  
47  
48  
49  
50  
51  
52  
53  
54  
55  
56  
57  
58  
59  
60

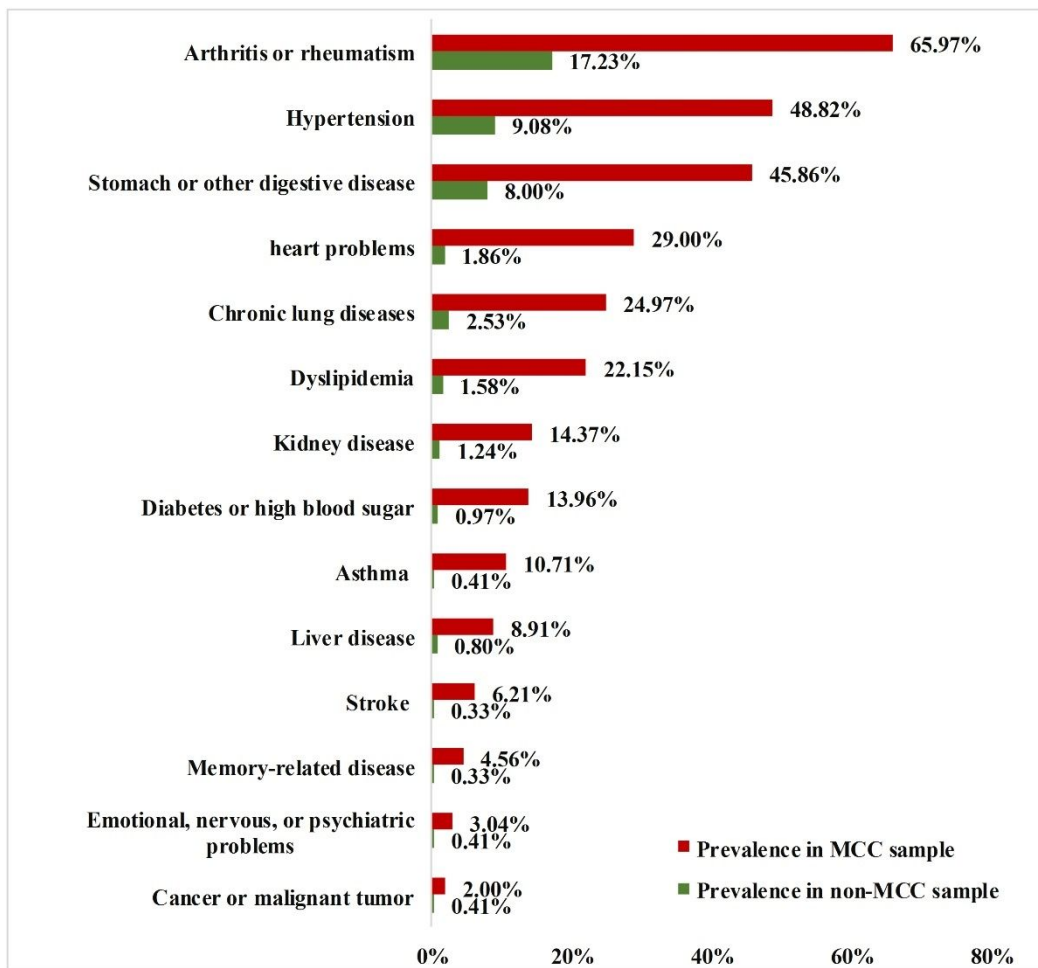

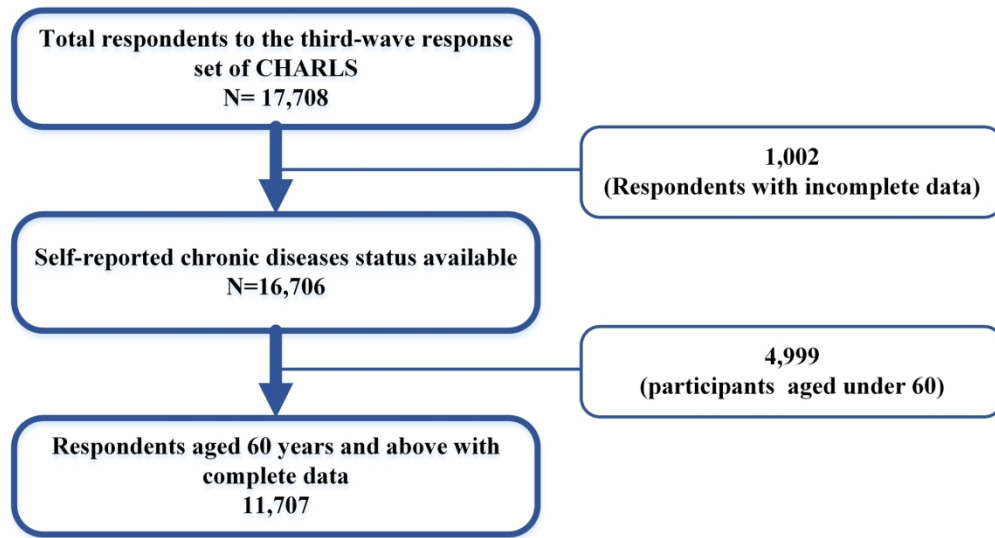

Figure 1 Flowchart for selecting the study sample from the original sample population. CHARLS, China Health and Retirement Longitudinal Survey

171x93mm (300 x 300 DPI)



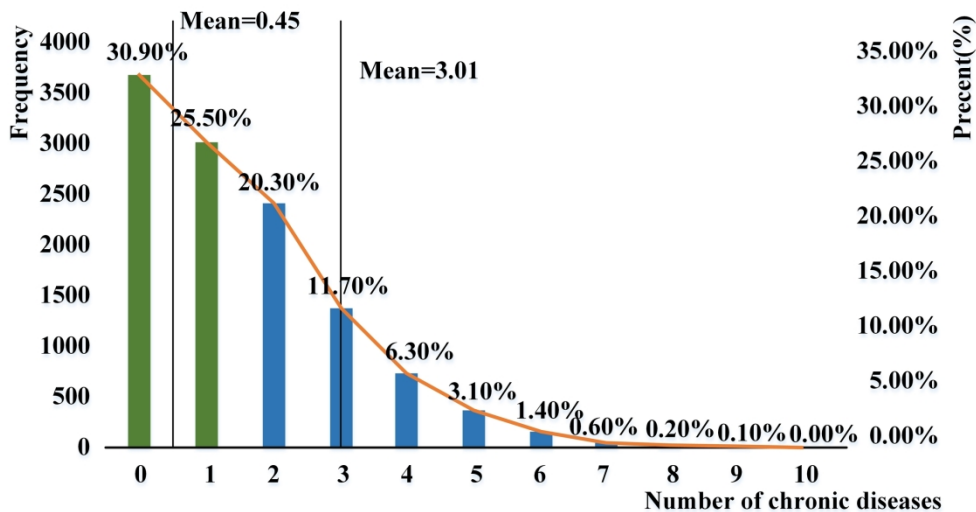

Figure 2 Frequency and percentage of people aged over 60 suffering from different diseases based on CHARLS data

222x119mm (300 x 300 DPI)

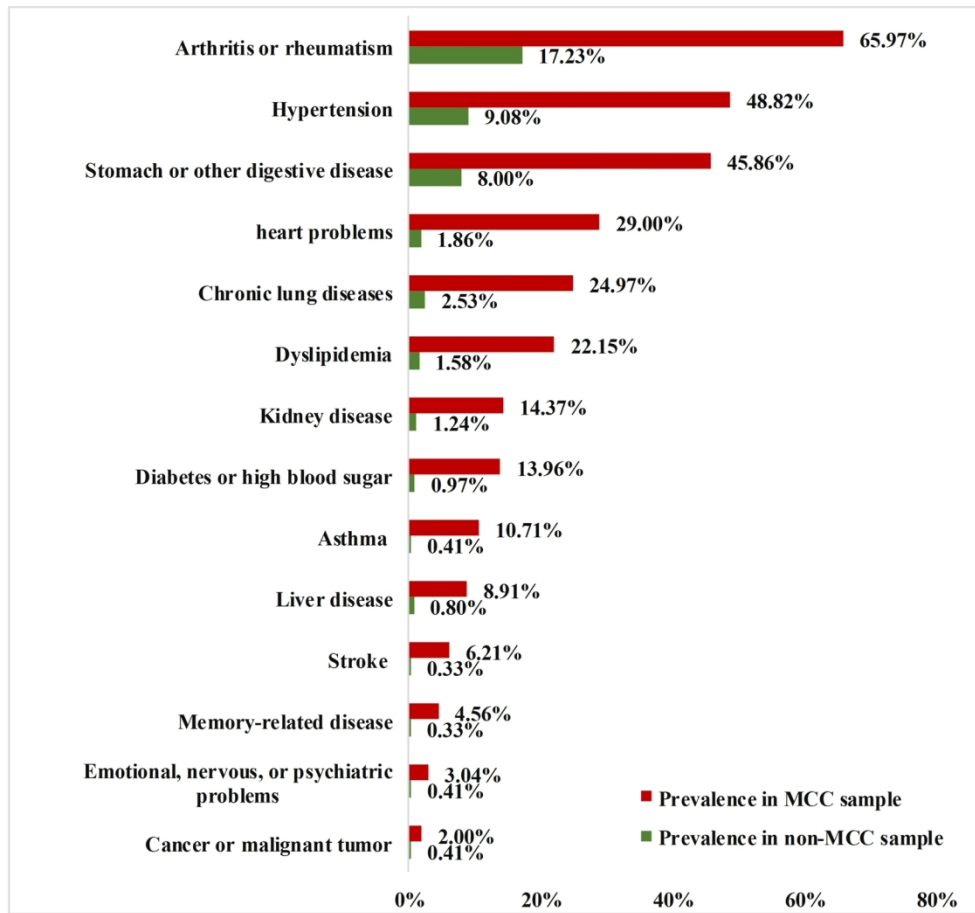

Figure 3 Prevalence Rates of chronic condition in elderly people over 60 years old based on CHARLS data

151x140mm (300 x 300 DPI)

**Annex 1 O/E ratio of all binary and triads comorbidities pattern present in participants**

| Rank | binary comorbidities pattern                                           | O/E ratio |
|------|------------------------------------------------------------------------|-----------|
| 1    | Chronic lung diseases and Asthma                                       | 161.00    |
| 2    | Emotional, nervous, or psychiatric problems and Memory-related disease | 98.57     |
| 3    | Dyslipidemia and Diabetes or high blood sugar                          | 38.69     |
| 4    | Heart disease and Memory-related disease                               | 25.96     |
| 5    | Stroke and Memory-related disease                                      | 24.19     |
| 6    | Hypertension and Stroke                                                | 23.10     |
| 7    | Hypertension and Diabetes or high blood sugar                          | 20.77     |
| 8    | Cancer or malignant tumor and Stroke                                   | 19.71     |
| 9    | Memory-related disease and Asthma                                      | 19.71     |
| 10   | Stroke and Asthma                                                      | 19.71     |
| 11   | Hypertension and Heart disease                                         | 19.07     |
| 12   | Hypertension and Dyslipidemia                                          | 18.98     |
| 13   | Dyslipidemia and Heart disease                                         | 17.39     |
| 14   | Diabetes or high blood sugar and Heart disease                         | 14.87     |
| 15   | Diabetes or high blood sugar and Liver disease                         | 14.40     |
| 16   | Cancer or malignant tumor and Liver disease                            | 13.65     |
| 17   | Diabetes or high blood sugar and Kidney disease                        | 13.38     |
| 18   | Hypertension and Memory-related disease                                | 13.33     |
| 19   | Dyslipidemia and Cancer or malignant tumor                             | 12.51     |
| 20   | Stomach or other digestive disease and Arthritis or rheumatism         | 10.80     |
| 21   | Liver disease and Heart disease                                        | 10.49     |
| 22   | Dyslipidemia and Stroke                                                | 10.23     |
| 23   | Dyslipidemia and Stomach or other digestive disease                    | 9.81      |
| 24   | Dyslipidemia and Kidney disease                                        | 9.61      |
| 25   | Chronic lung diseases and Memory-related disease                       | 9.56      |
| 26   | Chronic lung diseases and Stroke                                       | 9.56      |
| 27   | Kidney disease and Arthritis or rheumatism                             | 9.42      |
| 28   | Heart disease and Kidney disease                                       | 9.29      |
| 29   | Chronic lung diseases and Heart disease                                | 9.12      |
| 30   | Stomach or other digestive disease and Asthma                          | 9.03      |
| 31   | Liver disease and Kidney disease                                       | 8.99      |
| 32   | Kidney disease and Stomach or other digestive disease                  | 8.92      |
| 33   | Memory-related disease and Arthritis or rheumatism                     | 8.89      |
| 34   | Stroke and Arthritis or rheumatism                                     | 8.89      |
| 35   | Arthritis or rheumatism and Asthma                                     | 8.77      |
| 36   | Liver disease and Memory-related disease                               | 8.38      |
| 37   | Diabetes or high blood sugar and Memory-related disease                | 8.32      |
| 38   | Diabetes or high blood sugar and Stroke                                | 8.32      |
| 39   | Chronic lung diseases and Arthritis or rheumatism                      | 8.14      |
| 40   | Heart disease and Stomach or other digestive disease                   | 8.11      |

1  
2  
3  
4  
5  
6  
7  
8  
9  
10  
11  
12  
13  
14  
15  
16  
17  
18  
19  
20  
21  
22  
23  
24  
25  
26  
27  
28  
29  
30  
31  
32  
33  
34  
35  
36  
37  
38  
39  
40  
41  
42  
43  
44  
45  
46  
47  
48  
49  
50  
51  
52  
53  
54  
55  
56  
57  
58  
59  
60

|    |                                                                                    |      |
|----|------------------------------------------------------------------------------------|------|
| 41 | Heart disease and Arthritis or rheumatism                                          | 7.45 |
| 42 | Stomach or other digestive disease and Emotional, nervous, or psychiatric problems | 7.39 |
| 43 | Liver disease and Stomach or other digestive disease                               | 7.33 |
| 44 | Diabetes or high blood sugar and Cancer or malignant tumor                         | 6.78 |
| 45 | Diabetes or high blood sugar and Asthma                                            | 6.78 |
| 46 | Diabetes or high blood sugar and Arthritis or rheumatism                           | 6.44 |
| 47 | Liver disease and Arthritis or rheumatism                                          | 6.16 |
| 48 | Chronic lung diseases and Kidney disease                                           | 5.98 |
| 49 | Chronic lung diseases and Stomach or other digestive disease                       | 5.97 |
| 50 | Hypertension and Arthritis or rheumatism                                           | 5.74 |
| 51 | Chronic lung diseases and Liver disease                                            | 5.52 |
| 52 | Kidney disease and Emotional, nervous, or psychiatric problems                     | 5.29 |
| 53 | Kidney disease and Asthma                                                          | 5.29 |
| 54 | Chronic lung diseases and Emotional, nervous, or psychiatric problems              | 5.19 |
| 55 | Dyslipidemia and Memory-related disease                                            | 5.12 |
| 56 | Hypertension and Emotional, nervous, or psychiatric problems                       | 5.07 |
| 57 | Hypertension and Chronic lung diseases                                             | 5.03 |
| 58 | Hypertension and Kidney disease                                                    | 5.01 |
| 59 | Cancer or malignant tumor and Arthritis or rheumatism                              | 4.96 |
| 60 | Cancer or malignant tumor and Stomach or other digestive disease                   | 4.93 |
| 61 | Dyslipidemia and Arthritis or rheumatism                                           | 4.75 |
| 62 | Hypertension and Liver disease                                                     | 4.61 |
| 63 | Diabetes or high blood sugar and Chronic lung diseases                             | 4.38 |
| 64 | Heart disease and Stroke                                                           | 4.33 |
| 65 | Dyslipidemia and Asthma                                                            | 4.17 |
| 66 | Hypertension and Stomach or other digestive disease                                | 3.85 |
| 67 | Cancer or malignant tumor and Heart disease                                        | 3.53 |
| 68 | Heart disease and Asthma                                                           | 3.53 |
| 69 | Emotional, nervous, or psychiatric problems and Arthritis or rheumatism            | 3.43 |
| 70 | Diabetes or high blood sugar and Stomach or other digestive disease                | 3.12 |
| 71 | Hypertension and Cancer or malignant tumor                                         | 2.17 |
| 72 | Hypertension and Asthma                                                            | 2.17 |
| 73 | Stomach or other digestive disease and Memory-related disease                      | 2.02 |
| 74 | Stroke and Stomach or other digestive disease                                      | 2.02 |
| 75 | Dyslipidemia and Liver disease                                                     | 1.77 |
| 76 | Dyslipidemia and Chronic lung diseases                                             | 1.35 |

---

| Rank | triads comorbidities pattern                                                               | O/E ratio |
|------|--------------------------------------------------------------------------------------------|-----------|
| 1    | Stroke, Emotional, nervous, or psychiatric problems and Memory-related disease             | 10491.60  |
| 2    | Emotional, nervous, or psychiatric problems, Memory-related disease, Asthma,               | 8548.88   |
| 3    | Heart disease, Stroke and Memory-related disease                                           | 2302.62   |
| 4    | Chronic lung diseases, Emotional, nervous, or psychiatric problems and Asthma              | 2252.13   |
| 5    | Chronic lung diseases, Heart disease, Asthma,                                              | 1977.13   |
| 6    | Dyslipidemia, Heart disease and Memory-related disease                                     | 1461.04   |
| 7    | Hypertension, Stroke and Memory-related disease                                            | 1418.54   |
| 8    | Hypertension, Dyslipidemia and Diabetes or high blood sugar                                | 1409.29   |
| 9    | Chronic lung diseases, Memory-related disease and Asthma                                   | 1381.96   |
| 10   | Chronic lung diseases, Arthritis or rheumatism and Asthma                                  | 1256.63   |
| 11   | Dyslipidemia, Diabetes or high blood sugar and Kidney disease                              | 1255.51   |
| 12   | Cancer or malignant tumor, Chronic lung diseases and Asthma                                | 1126.07   |
| 13   | Chronic lung diseases, Kidney disease and Asthma                                           | 1112.24   |
| 14   | Liver disease, Kidney disease and Asthma                                                   | 974.52    |
| 15   | Dyslipidemia, Diabetes or high blood sugar and Liver disease                               | 972.21    |
| 16   | Chronic lung diseases, Liver disease and Asthma                                            | 956.96    |
| 17   | Dyslipidemia, Diabetes or high blood sugar and Stroke                                      | 935.99    |
| 18   | Chronic lung diseases, Stomach or other digestive disease and Asthma                       | 921.21    |
| 19   | Hypertension, Dyslipidemia and Heart disease                                               | 876.36    |
| 20   | Diabetes or high blood sugar, Liver disease and Kidney disease                             | 822.11    |
| 21   | Hypertension, Diabetes or high blood sugar and Stroke                                      | 812.58    |
| 22   | Hypertension, Chronic lung diseases and Asthma                                             | 812.01    |
| 23   | Hypertension, Dyslipidemia and Stroke                                                      | 800.07    |
| 24   | Dyslipidemia, Heart disease and Asthma                                                     | 793.67    |
| 25   | Diabetes or high blood sugar, Heart disease and Stroke                                     | 791.41    |
| 26   | Hypertension, Emotional, nervous, or psychiatric problems and Memory-related disease       | 770.58    |
| 27   | Dyslipidemia, Diabetes or high blood sugar and Cancer or malignant tumor                   | 762.67    |
| 28   | Dyslipidemia, Diabetes or high blood sugar and Emotional, nervous, or psychiatric problems | 762.67    |
| 29   | Dyslipidemia, Diabetes or high blood sugar and Heart disease                               | 669.54    |
| 30   | Liver disease, Heart disease and Emotional, nervous, or psychiatric problems               | 649.62    |
| 31   | Heart disease, Kidney disease and Memory-related disease                                   | 617.74    |
| 32   | Heart disease, Stroke and Kidney disease                                                   | 617.74    |
| 33   | Dyslipidemia, Chronic lung diseases and Asthma                                             | 584.58    |
| 34   | Diabetes or high blood sugar, Liver disease and Heart disease                              | 548.02    |

1  
2  
3  
4  
5  
6  
7  
8  
9  
10  
11  
12  
13  
14  
15  
16  
17  
18  
19  
20  
21  
22  
23  
24  
25  
26  
27  
28  
29  
30  
31  
32  
33  
34  
35  
36  
37  
38  
39  
40  
41  
42  
43  
44  
45  
46  
47  
48  
49  
50  
51  
52  
53  
54  
55  
56  
57  
58  
59  
60

---

|    |                                                                                                            |        |
|----|------------------------------------------------------------------------------------------------------------|--------|
| 35 | Hypertension, Diabetes or high blood sugar and Heart disease                                               | 523.14 |
| 36 | Hypertension, Heart disease and Stroke                                                                     | 507.36 |
| 37 | Diabetes or high blood sugar, Chronic lung diseases and Asthma                                             | 474.98 |
| 38 | Liver disease, Stomach or other digestive disease and Asthma                                               | 454.02 |
| 39 | Stomach or other digestive disease, Emotional, nervous, or psychiatric problems and Memory-related disease | 437.10 |
| 40 | Hypertension, Memory-related disease, Asthma,                                                              | 385.29 |
| 41 | Diabetes or high blood sugar, Stomach or other digestive disease and Asthma                                | 300.46 |
| 42 | Hypertension, Dyslipidemia and Memory-related disease                                                      | 300.03 |
| 43 | Liver disease, Kidney disease and Arthritis or rheumatism                                                  | 277.66 |
| 44 | Hypertension, Heart disease and Memory-related disease                                                     | 253.68 |
| 45 | Dyslipidemia, Liver disease and Kidney disease                                                             | 252.95 |
| 46 | Hypertension, Chronic lung diseases and Stroke                                                             | 249.13 |
| 47 | Stroke, Memory-related disease and Arthritis or rheumatism                                                 | 249.11 |
| 48 | Dyslipidemia, Chronic lung diseases and Liver disease                                                      | 248.40 |
| 49 | Cancer or malignant tumor, Chronic lung diseases and Heart disease                                         | 247.14 |
| 50 | Chronic lung diseases, Heart disease and Emotional, nervous, or psychiatric problems                       | 247.14 |
| 51 | Hypertension, Dyslipidemia and Asthma                                                                      | 244.47 |
| 52 | Cancer or malignant tumor, Heart disease and Stomach or other digestive disease                            | 234.50 |
| 53 | Chronic lung diseases, Memory-related disease and Arthritis or rheumatism                                  | 229.69 |
| 54 | Chronic lung diseases, Stroke and Stomach or other digestive disease                                       | 211.98 |
| 55 | Hypertension, Stroke and Arthritis or rheumatism                                                           | 210.41 |
| 56 | Chronic lung diseases, Liver disease and Heart disease                                                     | 210.03 |
| 57 | Hypertension, Cancer or malignant tumor and Heart disease                                                  | 206.71 |
| 58 | Hypertension, Heart disease and Emotional, nervous, or psychiatric problems                                | 206.71 |
| 59 | Memory-related disease, Arthritis or rheumatism and Asthma                                                 | 202.98 |
| 60 | Emotional, nervous, or psychiatric problems, Memory-related disease and Arthritis or rheumatism            | 202.98 |
| 61 | Stroke, Emotional, nervous, or psychiatric problems and Arthritis or rheumatism                            | 202.98 |
| 62 | Stroke, Kidney disease and Arthritis or rheumatism                                                         | 200.49 |
| 63 | Dyslipidemia, Diabetes or high blood sugar and Stomach or other digestive disease                          | 194.98 |
| 64 | Liver disease, Stomach or other digestive disease and Memory-related disease                               | 185.73 |
| 65 | Dyslipidemia, Stomach or other digestive disease and Asthma                                                | 184.90 |
| 66 | Diabetes or high blood sugar, Stomach or other digestive disease and Memory-related disease                | 184.37 |
| 67 | Diabetes or high blood sugar, Heart disease and Arthritis or rheumatism                                    | 183.74 |

---

|    |     |                                                                                                          |
|----|-----|----------------------------------------------------------------------------------------------------------|
| 1  |     |                                                                                                          |
| 2  |     |                                                                                                          |
| 3  |     |                                                                                                          |
| 4  | 68  | Chronic lung diseases, Stroke and Arthritis or rheumatism 164.06                                         |
| 5  | 69  | Kidney disease, Arthritis or rheumatism and Asthma 163.36                                                |
| 6  |     |                                                                                                          |
| 7  | 70  | Dyslipidemia, Diabetes or high blood sugar and Arthritis or rheumatism 162.98                            |
| 8  | 71  | Hypertension, Diabetes or high blood sugar and Memory-related disease 162.52                             |
| 9  | 72  | Hypertension, Dyslipidemia and Kidney disease 160.98                                                     |
| 10 |     |                                                                                                          |
| 11 | 73  | Hypertension, Heart disease and Kidney disease 158.80                                                    |
| 12 | 74  | Chronic lung diseases, Liver disease and Kidney disease 157.53                                           |
| 13 | 75  | Dyslipidemia, Liver disease and Stomach or other digestive disease 157.13                                |
| 14 | 76  | Heart disease, Kidney disease and Stomach or other digestive disease 154.42                              |
| 15 |     |                                                                                                          |
| 16 | 77  | Cancer or malignant tumor, Liver disease and Stomach or other digestive disease 151.34                   |
| 17 |     |                                                                                                          |
| 18 |     |                                                                                                          |
| 19 | 78  | Liver disease, Stomach or other digestive disease and Emotional, nervous, or psychiatric problems 151.34 |
| 20 |     |                                                                                                          |
| 21 | 79  | Heart disease, Arthritis or rheumatism and Asthma 145.20                                                 |
| 22 | 80  | Stroke, Kidney disease and Stomach or other digestive disease 143.91                                     |
| 23 |     |                                                                                                          |
| 24 | 81  | Liver disease, Emotional, nervous, or psychiatric problems and Arthritis or rheumatism 140.56            |
| 25 |     |                                                                                                          |
| 26 | 82  | Diabetes or high blood sugar, Arthritis or rheumatism and Asthma 139.53                                  |
| 27 | 83  | Hypertension, Dyslipidemia and Liver disease 138.50                                                      |
| 28 |     |                                                                                                          |
| 29 | 84  | Hypertension, Heart disease and Asthma 137.80                                                            |
| 30 |     |                                                                                                          |
| 31 | 85  | Kidney disease, Stomach or other digestive disease and Arthritis or rheumatism 136.43                    |
| 32 |     |                                                                                                          |
| 33 | 86  | Chronic lung diseases, Emotional, nervous, or psychiatric problems and Arthritis or rheumatism 133.68    |
| 34 |     |                                                                                                          |
| 35 | 87  | Hypertension, Liver disease and Asthma 133.40                                                            |
| 36 | 88  | Hypertension, Diabetes or high blood sugar and Cancer or malignant tumor 132.42                          |
| 37 |     |                                                                                                          |
| 38 | 89  | Chronic lung diseases, Stomach or other digestive disease and Arthritis or rheumatism 131.24             |
| 39 |     |                                                                                                          |
| 40 | 90  | Hypertension, Diabetes or high blood sugar and Kidney disease 130.80                                     |
| 41 |     |                                                                                                          |
| 42 | 91  | Heart disease, Stomach or other digestive disease and Arthritis or rheumatism 128.06                     |
| 43 |     |                                                                                                          |
| 44 | 92  | Dyslipidemia, Heart disease and Stomach or other digestive disease 121.74                                |
| 45 | 93  | Hypertension, Heart disease and Arthritis or rheumatism 121.06                                           |
| 46 |     |                                                                                                          |
| 47 | 94  | Stomach or other digestive disease, Arthritis or rheumatism and Asthma 118.39                            |
| 48 | 95  | Chronic lung diseases, Heart disease and Arthritis or rheumatism 117.36                                  |
| 49 | 96  | Hypertension, Liver disease and Heart disease 117.11                                                     |
| 50 |     |                                                                                                          |
| 51 | 97  | Diabetes or high blood sugar, Kidney disease and Arthritis or rheumatism 114.85                          |
| 52 |     |                                                                                                          |
| 53 | 98  | Chronic lung diseases, Heart disease and Stomach or other digestive disease 113.73                       |
| 54 |     |                                                                                                          |
| 55 | 99  | Hypertension, Diabetes or high blood sugar and Liver disease 112.54                                      |
| 56 | 100 | Diabetes or high blood sugar, Chronic lung diseases and Heart disease 104.24                             |
| 57 |     |                                                                                                          |
| 58 | 101 | Liver disease, Stomach or other digestive disease and Arthritis or rheumatism 104.21                     |
| 59 |     |                                                                                                          |
| 60 | 102 | Stroke, Stomach or other digestive disease and Arthritis or rheumatism 103.78                            |

|    |     |                                                                                                  |
|----|-----|--------------------------------------------------------------------------------------------------|
| 1  |     |                                                                                                  |
| 2  |     |                                                                                                  |
| 3  |     |                                                                                                  |
| 4  | 103 | Hypertension, Kidney disease and Emotional, nervous, or psychiatric problems                     |
| 5  |     |                                                                                                  |
| 6  | 104 | Chronic lung diseases, Liver disease and Arthritis or rheumatism                                 |
| 7  | 105 | Hypertension, Dyslipidemia and Arthritis or rheumatism                                           |
| 8  | 106 | Liver disease, Kidney disease and Stomach or other digestive disease                             |
| 9  |     |                                                                                                  |
| 10 | 107 | Dyslipidemia, Cancer or malignant tumor and Stomach or other digestive disease                   |
| 11 |     |                                                                                                  |
| 12 | 108 | Dyslipidemia, Stomach or other digestive disease and Emotional, nervous, or psychiatric problems |
| 13 |     |                                                                                                  |
| 14 | 109 | Hypertension, Dyslipidemia and Chronic lung diseases                                             |
| 15 | 110 | Hypertension, Chronic lung diseases and Heart disease                                            |
| 16 | 111 | Heart disease, Stroke and Arthritis or rheumatism                                                |
| 17 | 112 | Hypertension, Heart disease and Stomach or other digestive disease                               |
| 18 | 113 | Chronic lung diseases, Heart disease and Kidney disease                                          |
| 19 | 114 | Chronic lung diseases, Kidney disease and Arthritis or rheumatism                                |
| 20 | 115 | Diabetes or high blood sugar, Chronic lung diseases and Arthritis or rheumatism                  |
| 21 |     |                                                                                                  |
| 22 | 116 | Chronic lung diseases, Kidney disease and Stomach or other digestive disease                     |
| 23 |     |                                                                                                  |
| 24 | 117 | Hypertension, Diabetes or high blood sugar and Arthritis or rheumatism                           |
| 25 | 118 | Hypertension, Dyslipidemia and Stomach or other digestive disease                                |
| 26 | 119 | Chronic lung diseases, Liver disease and Stomach or other digestive disease                      |
| 27 |     |                                                                                                  |
| 28 | 120 | Hypertension, Memory-related disease and Arthritis or rheumatism                                 |
| 29 | 121 | Stomach or other digestive disease, Memory-related disease and Arthritis or rheumatism           |
| 30 | 122 | Heart disease, Kidney disease and Arthritis or rheumatism                                        |
| 31 | 123 | Liver disease, Arthritis or rheumatism and Asthma                                                |
| 32 | 124 | Diabetes or high blood sugar, Cancer or malignant tumor and Arthritis or rheumatism              |
| 33 | 125 | Kidney disease, Memory-related disease and Arthritis or rheumatism                               |
| 34 | 126 | Dyslipidemia, Heart disease and Arthritis or rheumatism                                          |
| 35 | 127 | Diabetes or high blood sugar, Heart disease and Stomach or other digestive disease               |
| 36 |     |                                                                                                  |
| 37 | 128 | Dyslipidemia, Chronic lung diseases and Heart disease                                            |
| 38 | 129 | Hypertension, Kidney disease and Arthritis or rheumatism                                         |
| 39 | 130 | Dyslipidemia, Stomach or other digestive disease and Arthritis or rheumatism                     |
| 40 |     |                                                                                                  |
| 41 | 131 | Hypertension, Chronic lung diseases and Memory-related disease                                   |
| 42 | 132 | Dyslipidemia, Kidney disease and Stomach or other digestive disease                              |
| 43 | 133 | Hypertension, Stroke and Stomach or other digestive disease                                      |
| 44 | 134 | Cancer or malignant tumor, Chronic lung diseases and Stomach or other digestive disease          |
| 45 |     |                                                                                                  |
| 46 |     |                                                                                                  |
| 47 |     |                                                                                                  |
| 48 |     |                                                                                                  |
| 49 |     |                                                                                                  |
| 50 |     |                                                                                                  |
| 51 |     |                                                                                                  |
| 52 |     |                                                                                                  |
| 53 |     |                                                                                                  |
| 54 |     |                                                                                                  |
| 55 |     |                                                                                                  |
| 56 |     |                                                                                                  |
| 57 |     |                                                                                                  |
| 58 |     |                                                                                                  |
| 59 |     |                                                                                                  |
| 60 |     |                                                                                                  |



|    |     |                                                                                                             |
|----|-----|-------------------------------------------------------------------------------------------------------------|
| 1  |     |                                                                                                             |
| 2  |     |                                                                                                             |
| 3  |     |                                                                                                             |
| 4  | 135 | Cancer or malignant tumor, Chronic lung diseases and Arthritis or rheumatism                                |
| 5  |     |                                                                                                             |
| 6  | 136 | Hypertension, Stomach or other digestive disease and Arthritis or rheumatism                                |
| 7  |     |                                                                                                             |
| 8  | 137 | Dyslipidemia, Memory-related disease and Arthritis or rheumatism                                            |
| 9  | 138 | Dyslipidemia, Stroke and Arthritis or rheumatism                                                            |
| 10 | 139 | Hypertension, Cancer or malignant tumor and Chronic lung diseases                                           |
| 11 | 140 | Hypertension, Chronic lung diseases and Kidney disease                                                      |
| 12 | 141 | Liver disease, Heart disease and Arthritis or rheumatism                                                    |
| 13 | 142 | Hypertension, Cancer or malignant tumor and Arthritis or rheumatism                                         |
| 14 | 143 | Hypertension, Liver disease and Kidney disease                                                              |
| 15 | 144 | Hypertension, Chronic lung diseases and Liver disease                                                       |
| 16 | 145 | Dyslipidemia, Cancer or malignant tumor and Arthritis or rheumatism                                         |
| 17 | 146 | Dyslipidemia, Arthritis or rheumatism and Asthma                                                            |
| 18 | 147 | Hypertension, Diabetes or high blood sugar and Chronic lung diseases                                        |
| 19 | 148 | Dyslipidemia, Kidney disease and Arthritis or rheumatism                                                    |
| 20 | 149 | Stomach or other digestive disease, Emotional, nervous, or psychiatric problems and Arthritis or rheumatism |
| 21 | 150 | Hypertension, Liver disease and Arthritis or rheumatism                                                     |
| 22 | 151 | Hypertension, Stomach or other digestive disease and Memory-related disease                                 |
| 23 | 152 | Diabetes or high blood sugar, Stomach or other digestive disease and Arthritis or rheumatism                |
| 24 | 153 | Hypertension, Arthritis or rheumatism and Asthma                                                            |
| 25 | 154 | Dyslipidemia, Liver disease and Arthritis or rheumatism                                                     |
| 26 | 155 | Heart disease, Emotional, nervous, or psychiatric problems and Arthritis or rheumatism                      |
| 27 | 156 | Hypertension, Chronic lung diseases and Arthritis or rheumatism                                             |
| 28 | 157 | Dyslipidemia, Chronic lung diseases and Arthritis or rheumatism                                             |
| 29 | 158 | Hypertension, Diabetes or high blood sugar and Stomach or other digestive disease                           |
| 30 | 159 | Cancer or malignant tumor, Stomach or other digestive disease and Arthritis or rheumatism                   |
| 31 | 160 | Liver disease, Heart disease and Stomach or other digestive disease                                         |
| 32 | 161 | Dyslipidemia, Chronic lung diseases and Stomach or other digestive disease                                  |
| 33 | 162 | Diabetes or high blood sugar, Liver disease and Arthritis or rheumatism                                     |
| 34 | 163 | Hypertension, Kidney disease and Stomach or other digestive disease                                         |
| 35 | 164 | Diabetes or high blood sugar, Chronic lung diseases and Stomach or other digestive disease                  |
| 36 | 165 | Hypertension, Emotional, nervous, or psychiatric problems and Arthritis or rheumatism                       |
| 37 | 166 | Hypertension, Liver disease and Stomach or other digestive disease                                          |
| 38 |     |                                                                                                             |
| 39 |     |                                                                                                             |
| 40 |     |                                                                                                             |
| 41 |     |                                                                                                             |
| 42 |     |                                                                                                             |
| 43 |     |                                                                                                             |
| 44 |     |                                                                                                             |
| 45 |     |                                                                                                             |
| 46 |     |                                                                                                             |
| 47 |     |                                                                                                             |
| 48 |     |                                                                                                             |
| 49 |     |                                                                                                             |
| 50 |     |                                                                                                             |
| 51 |     |                                                                                                             |
| 52 |     |                                                                                                             |
| 53 |     |                                                                                                             |
| 54 |     |                                                                                                             |
| 55 |     |                                                                                                             |
| 56 |     |                                                                                                             |
| 57 |     |                                                                                                             |
| 58 |     |                                                                                                             |
| 59 |     |                                                                                                             |
| 60 |     |                                                                                                             |

---

|     |                                                                                                  |       |
|-----|--------------------------------------------------------------------------------------------------|-------|
| 167 | Hypertension, Cancer or malignant tumor and Stomach or other digestive disease                   | 16.05 |
| 168 | Hypertension, Stomach or other digestive disease and Emotional, nervous, or psychiatric problems | 16.05 |
| 169 | Hypertension, Chronic lung diseases and Stomach or other digestive disease                       | 15.57 |

---

For peer review only

1  
2  
3  
4  
5  
6  
7  
8  
9  
10  
11  
12  
13  
14  
15  
16  
17  
18  
19  
20  
21  
22  
23  
24  
25  
26  
27  
28  
29  
30  
31  
32  
33  
34  
35  
36  
37  
38  
39  
40  
41  
42  
43  
44  
45  
46  
47  
48  
49  
50  
51  
52  
53  
54  
55  
56  
57  
58  
59  
60

# BMJ Open

## Prevalence and patterns of multimorbidity among the elderly in China: a cross-sectional study using national survey data

|                                 |                                                                                                                                                                                                                                                                                                                                                                                                                                                                                                 |
|---------------------------------|-------------------------------------------------------------------------------------------------------------------------------------------------------------------------------------------------------------------------------------------------------------------------------------------------------------------------------------------------------------------------------------------------------------------------------------------------------------------------------------------------|
| Journal:                        | <i>BMJ Open</i>                                                                                                                                                                                                                                                                                                                                                                                                                                                                                 |
| Manuscript ID                   | bmjopen-2018-024268.R2                                                                                                                                                                                                                                                                                                                                                                                                                                                                          |
| Article Type:                   | Research                                                                                                                                                                                                                                                                                                                                                                                                                                                                                        |
| Date Submitted by the Author:   | 28-Feb-2019                                                                                                                                                                                                                                                                                                                                                                                                                                                                                     |
| Complete List of Authors:       | zhang, ran; China Pharmaceutical University, School of International Pharmaceutical Business<br>Lu, Yun; China Pharmaceutical University, School of International Pharmaceutical Business<br>Shi, Liuyan; China Pharmaceutical University, School of International Pharmaceutical Business<br>Zhang, SongLin; China Pharmaceutical University, School of International Pharmaceutical Business<br>Chang, Feng; China Pharmaceutical University, School of International Pharmaceutical Business |
| <b>Primary Subject Heading</b>: | Health informatics                                                                                                                                                                                                                                                                                                                                                                                                                                                                              |
| Secondary Subject Heading:      | Public health, Qualitative research                                                                                                                                                                                                                                                                                                                                                                                                                                                             |
| Keywords:                       | multimorbidity, cross-sectional study, Prevalence, Observed-to-expected ratio, China                                                                                                                                                                                                                                                                                                                                                                                                            |
|                                 |                                                                                                                                                                                                                                                                                                                                                                                                                                                                                                 |

SCHOLARONE™  
Manuscripts

1  
2  
3  
4 **Prevalence and patterns of multimorbidity among the elderly**  
5  
6 **in China: a cross-sectional study using national survey data**  
7  
8

9 **Author**

10  
11 **NAME: Ran Zhang**

12  
13 **Postal address: 639 Longmian Road, Nanjing, Jiangsu Province, CHINA**

14  
15 **E-mail: ranzai7@126.com**

16  
17 **Institutions: China Pharmaceutical University**

18  
19 **City & Country: Jiangsu Province, CHINA**

20  
21 **Telephone: +86-18115161231**

22  
23 **Corresponding Author**

24  
25 **NAME: Feng Chang**

26  
27 **Postal address: 639 Longmian Road, Nanjing, Jiangsu Province, CHINA**

28  
29 **E-mail: cpucf@163.com**

30  
31 **Institutions: China Pharmaceutical University**

32  
33 **City & Country: Jiangsu Province, CHINA**

34  
35 **Telephone: +86-13805153128**

36  
37 **Co-Authors**

38  
39 **NAME: Yun Lu, Liuyan Shi, Songlin Zhang**

40  
41 **Institutions: China Pharmaceutical University**

42  
43 **City & Country: Jiangsu Province, CHINA**

44  
45 **Keywords:**

46  
47 **multimorbidity, Cross-sectional study, Prevalence, Observed-to-expected ratio,**

48  
49 **China**

50  
51 **Word count: 4911**  
52  
53  
54  
55  
56  
57  
58  
59  
60

## ABSTRACT

**Objectives:** Examination of the prevalence and patterns of multimorbidity among the elderly in China.

**Design:** Cross-sectional study.

**Setting:** More than 10,000 households in 28 of the 34 provinces of mainland China.

**Participants:** 11,707 Chinese adults aged 60 and over.

**Primary outcome measures:** Prevalence and patterns of multimorbidity among the participants. Relative risks were calculated to estimate the probability of up to 14 chronic conditions coexisting with each other. Observed-to-expected (O/E) ratios were used to analyze the patterns of multimorbidity.

**Results:** Multimorbidity was present in 43.6% of respondents from the sample population, with women having the greater prevalence compared to men. There were 804 different comorbidity combinations identified, including 76 dyad combinations and 169 triad combinations. The top 10 morbidity dyads and triads accounted for 69.01% and 47.05% of the total dyad and triad combinations observed, respectively. Among the 14 chronic conditions included in the study, asthma, stroke, heart attack and six other chronic conditions were the main components of multimorbidity due to their high relative risk ratios. The most frequently occurring clusters with higher O/E ratios were stroke along with emotional, nervous, or psychiatric problems; memory-related diseases together emotional, nervous, or psychiatric problems; and memory-related diseases and asthma accompanied by chronic lung diseases and asthma.

**Conclusions:** The results of this study highlight the high prevalence of multimorbidity in the elderly population in China. Further studies are required to understand the etiology of multimorbidity, and future primary healthcare policies should be made while taking multimorbidity into consideration.

## Strengths and limitations of this study

### Strengths

- This is the first study to estimate the prevalence and patterns of multimorbidity among the elderly population in China.
- Data for this study were collected from a nationally representative longitudinal survey of 17,708 Chinese residents.

### Limitations

- Only 14 predefined chronic diseases were included in the study, and these may not be comprehensive of the conditions of the population.
- The data analyzed from the CHARLS were originally collected by population self-reporting, not clinician evaluation, and could partially reflect some associated biases or confounds.
- The exclusion of incomplete data may cause a selection bias.

## INTRODUCTION

Multimorbidity, or the simultaneous occurrence of two or more chronic conditions in an individual, is becoming increasingly common, and this has been reported to increase progressively with age. [1, 2] At present, with China's aging population having an increasing prevalence of chronic conditions, multimorbidity among the elderly poses an enormous societal cost due to increased mortality rates and healthcare utilization. [3] However, to date, research on chronic conditions in China has focused on single disease states, and the coexistence of multiple chronic conditions has not been investigated systematically and thoroughly.

There is a significant difference in the etiological analysis between patients with single chronic conditions and those with multimorbidity. [4] The coexistence of chronic conditions in a patient is more than a random event, it is more typically due to the causal relationship between some diseases and shared pathogenic factors. [5, 6] Moreover, the interactions between diseases or between a disease and host result in differences in the severity of multimorbidity and functional status and prognosis of patients with multimorbidity. [7] Consequently, it is imperative to begin research on multimorbidity in China for the cost-effective treatments that the results may help to suggest. [8] The purpose of this study was therefore to determine the prevalence of multimorbidity among the elderly in China and to reveal morbidity combinations, which may benefit the design and implementation of a modified healthcare system with consideration for patients with multimorbidity.

## METHODS

### Data source

Data for this study were collected from the third response of the China Health and Retirement Longitudinal Survey (CHARLS), which is the most current data available. The CHARLS is a nationally representative longitudinal survey of Chinese residents aged 45 and older that was conducted by the Chinese Center for Disease Control and Prevention, along with Peking University, to help China to adjust to the rapid aging of its population through the evaluation of social, economic, and health circumstances on

1  
2  
3 the community level using data collected by interviews, physical measurements and  
4 blood sample collection. [9] The national baseline survey began in 2011 and involved  
5 17,708 respondents from 150 county-level units, 450 village-level units, and  
6 approximately 10,000 households. Afterwards, CHARLS respondents were followed  
7 every second year, with their informed consent, and the study was approved by the  
8 Peking University Biomedical Ethics Committee (IRB00001052-14013-exemption).  
9  
10  
11  
12  
13

### 14 15 **Variables**

16  
17 The core CHARLS questionnaires included sections requesting information on  
18 demographic factors, family structure and changes, health status and functioning,  
19 healthcare and insurance, work, retirement and pension, income and consumption, and  
20 assets (individual and household). Information was collected by interview by trained  
21 staff. For the current study, the eligible and included participants were determined by  
22 being aged 60 and over, and data on gender, age and health status was used from the  
23 general health status and disease history section of senior citizens in the 2015 CHARLS  
24 data. This information included the following 14 common chronic health problems:  
25 hypertension, dyslipidemia (high blood lipids or low cholesterol), diabetes or elevated  
26 blood glucose (including impaired glucose tolerance and fasting blood glucose), cancer  
27 (excluding mild skin cancers), chronic lung disease such as chronic bronchitis or  
28 emphysema, pulmonary heart disease (excluding tumors or cancer), liver disease (other  
29 than fatty liver, tumors, or cancer), heart disease (such as myocardial infarction,  
30 coronary heart disease, angina pectoris, congestive heart failure and other heart  
31 diseases), stroke, kidney disease (excluding tumors or cancer), stomach or other  
32 digestive diseases (excluding tumors or cancer), emotional and mental problems,  
33 memory-related diseases (such as Alzheimer's disease, brain atrophy, Parkinson's  
34 disease), arthritis or rheumatism, and asthma. All these data were based on self-reports.  
35 Accordingly, multimorbidity was defined as the coexistence of more than one of the 14  
36 chronic conditions, with acute or subacute forms of certain conditions being excluded  
37 in this study due to the CHARLS data collection protocol.  
38  
39  
40  
41  
42  
43  
44  
45  
46  
47  
48  
49  
50  
51  
52  
53  
54

### 55 **Statistical analysis**

56 To detect the demographic characteristics of patients with multimorbidity,  
57 respondents were divided into two groups: those with multiple chronic conditions  
58 (MCC group) and those without multiple chronic conditions (Non-MCC group).  
59  
60



1  
2  
3 Descriptive statistics were calculated and expressed as means (SD) and frequencies  
4 (percentage). We applied the  $T^2$  and  $\chi^2$  tests to test the differences in age, gender and  
5 the mean number of chronic conditions across different subgroups. Respective  
6 prevalence in the MCC group and the non-MCC group were calculated separately.  
7  
8 Given the exclusion of participants with incomplete data or aged under 60, a sensitivity  
9 analysis was conducted to compare the characteristics of the complete cases and the  
10 incomplete cases, which is presented in [Annex 1](#).  
11  
12  
13  
14

15 To determine the most common combination of chronic diseases, the prevalence of  
16 morbidity and multimorbidity dyads and triads were estimated, respectively. Next, the  
17 expected number of patients with a chronic disease were calculated, and the observed-  
18 to-expected (O/E) ratios were determined by dividing the number of patients in those  
19 groups by the expected number of patients. Observed-to-expected ratios were used to  
20 estimate the conditional probability of coexistence of two or three chronic conditions.  
21 [10] As an important indicator for assessing the correlation between diseases, the O/E  
22 ratio has been used in many areas of comorbidity. [10, 11] The relative risk of  
23 comorbidity for individual chronic conditions was also calculated. Relative risk of  
24 comorbidity (RR) is the ratio of the number of people with a certain chronic condition  
25 who suffer from multimorbidity to the number of patients with the same disease who  
26 do not suffer from multimorbidity. [11, 12] In other words, a higher RR value means a  
27 higher probability that the disease coexists with other diseases. However, it should be  
28 noted that there is no direct relationship between the relative risk of comorbidity and  
29 the overall prevalence of the diseases. [13, 14]  
30  
31  
32  
33  
34  
35  
36  
37  
38  
39  
40

41 All analyses in this study were completed using Stata software V.14.0 for Windows  
42 (Stata Corp). P Values <0.05 were considered to be statistically significant.  
43  
44  
45

### 46 **Patient and public involvement**

47 Patients and the public were not involved in the development of the research  
48 question or outcome measures of the study, nor were they involved in study design and  
49 execution. There are no plans to disseminate the research results to study participants.  
50  
51  
52  
53

## 54 **RESULTS**

### 55 **Characteristics of participants**

56 The data were gathered from the third response set of CHARLS. After exclusion  
57  
58  
59  
60

of participants with incomplete data (1,002) or aged under 60 (9,259), there were 11,707 respondents with available information on related chronic diseases that were included in this study. The selection process of study sample is shown in Figure 1. The demographic characteristics of sample respondents and statistical significance test results are presented in Table 1.

Overall, the mean age for the sample population was 70.5 (ranging from 60 to 107). The sample population consisted of 5,705 (48.7%) males and 6002 (51.2%) females, and 43.6% of them suffered from multimorbidity. The median of chronic conditions in the MCC group was 3.01, compared to 0.45 in the Non-MCC group. Samples in the MCC group were 0.66 year older than those belonged to the non-MCC group. Gender differences with regard to the age of samples between the MCC group and the non-MCC group (70.57 for MCC group and 69.51 for non-MCC group) were small but statistically significant ( $p < 0.001$ ). The prevalence of multimorbidity in the female population was higher than that for the males (54.41% vs 45.59%). Figure 2 shows the number and proportion of respondents over 60 according to morbidity numbers. It can be seen that among all the participants aged over 60, only 30.9% of them did not have the 14 chronic diseases and 43.6% suffer from multimorbidity.

**Table 1. Demographic characteristics of all respondents, the MCC group and non-MCC group**

|                                   | All respondent | MCC group    | Non-MCC group | P*     |
|-----------------------------------|----------------|--------------|---------------|--------|
| Number of people                  | 11707          | 5107         | 6600          |        |
| Proportion (%)                    | 100%           | 43.62%       | 56.38%        |        |
| Mean age                          |                |              |               |        |
| All respondents (SD)              | 70.20(7.907)   | 70.57(7.701) | 69.91(8.051)  | <0.001 |
| <b>Male</b> (SD)                  | 69.97(7.575)   | 70.50(7.348) | 69.60(7.707)  | <0.001 |
| <b>Female</b> (SD)                | 70.39(8.189)   | 70.62(7.892) | 70.19(8.359)  | <0.001 |
| Gender (% females)                | 51.28%         | 54.41%       | 48.83%        | <0.001 |
| Mean number of chronic conditions |                |              |               |        |
| All respondents (SD)              | 1.57(1.560)    | 3.01(1.259)  | 0.45(0.498)   | <0.001 |
| <b>Male</b> (SD)                  | 1.47(1.534)    | 2.98(1.265)  | 0.44(0.496)   | <0.001 |
| <b>Female</b> (SD)                | 1.65(1.581)    | 3.03(7.982)  | 0.47(0.499)   | <0.001 |

SD = standard deviation;

p\* = statistical significance of the difference between the MCC and the non-MCC sample (t-tests were performed for comparison of means, and chi-square-tests for differences between percentages)

### Prevalence of chronic conditions

The prevalence of chronic conditions in the entire sample, the MCC group and the non-MCC group are shown in Figure 3. The prevalence of all fourteen chronic conditions in the MCC group was significantly higher than that in the entire sample. For instance, the prevalence of arthritis or rheumatism, hypertension, stomach or other digestive disease, heart disease and chronic lung disease were 65.97%, 48.82%, 45.86%, 29.00% and 24.97% in the MCC group, compared to 38.49%, 26.41%, 24.52%, 12.32% and 12.32% in the entire sample, respectively.

Table 2 shows the relative risks of comorbidity determined for the 14 chronic diseases reported in this study. It can be seen that the overall relative risks for asthma, stroke, heart disease and six other conditions were all above 10, which meant these diseases were >10 times easier to coexist with other chronic conditions and result in multimorbidity. In addition, the relative risks for certain diseases were positively associated with gender. For example, men had significantly higher relative risks for asthma, but lower relative risks for diabetes or high blood sugar, compared to women.

**Table 2 Relative risks of multimorbidity for different chronic conditions according to gender**

| Chronic conditions                          | All respondents | 95% Confidence Interval |             | Female | 95% Confidence Interval |             | Male  | 95% Confidence Interval |             |  |
|---------------------------------------------|-----------------|-------------------------|-------------|--------|-------------------------|-------------|-------|-------------------------|-------------|--|
|                                             |                 | Lower Bound             | Upper Bound |        | Lower Bound             | Upper Bound |       | Lower Bound             | Upper Bound |  |
|                                             |                 |                         |             |        |                         |             |       |                         |             |  |
| <b>High relative risk of multimorbidity</b> |                 |                         |             |        |                         |             |       |                         |             |  |
| Asthma                                      | 26.18           | 17.82                   | 38.46       | 20.67  | 11.85                   | 36.06       | 32.68 | 19.18                   | 55.67       |  |
| Stroke                                      | 18.62           | 12.11                   | 28.64       | 21.57  | 10.61                   | 43.86       | 17.43 | 10.13                   | 29.99       |  |
| Heart disease                               | 15.56           | 12.99                   | 18.63       | 16.48  | 12.80                   | 21.21       | 14.26 | 11.02                   | 18.46       |  |
| Diabetes or high blood sugar                | 14.40           | 11.18                   | 18.55       | 15.68  | 10.86                   | 22.63       | 13.11 | 9.24                    | 18.62       |  |

|    |                                            |       |       |       |       |       |       |       |      |       |
|----|--------------------------------------------|-------|-------|-------|-------|-------|-------|-------|------|-------|
| 1  |                                            |       |       |       |       |       |       |       |      |       |
| 2  |                                            |       |       |       |       |       |       |       |      |       |
| 3  |                                            |       |       |       |       |       |       |       |      |       |
| 4  | Dyslipidemia                               | 14.05 | 11.54 | 17.12 | 15.13 | 11.37 | 20.14 | 12.97 | 9.86 | 17.05 |
| 5  | Memory-related disease                     | 13.69 | 8.85  | 21.16 | 34.17 | 12.63 | 92.44 | 9.28  | 5.66 | 15.21 |
| 6  |                                            |       |       |       |       |       |       |       |      |       |
| 7  | Kidney disease                             | 11.57 | 9.24  | 14.49 | 15.01 | 10.17 | 22.43 | 10.24 | 7.78 | 13.48 |
| 8  |                                            |       |       |       |       |       |       |       |      |       |
| 9  | Liver disease                              | 11.10 | 8.37  | 14.71 | 16.07 | 9.70  | 26.63 | 9.15  | 6.49 | 12.89 |
| 10 | Chronic lung diseases                      | 9.87  | 8.43  | 11.55 | 10.71 | 8.26  | 13.88 | 9.74  | 8.00 | 11.86 |
| 11 | <hr/>                                      |       |       |       |       |       |       |       |      |       |
| 12 | <b>Low relative risk of multimorbidity</b> |       |       |       |       |       |       |       |      |       |
| 13 |                                            |       |       |       |       |       |       |       |      |       |
| 14 | Emotional, nervous, or                     |       |       |       |       |       |       |       |      |       |
| 15 | psychiatric problems                       | 7.42  | 4.94  | 11.15 | 6.24  | 3.78  | 10.30 | 9.36  | 4.65 | 18.85 |
| 16 |                                            |       |       |       |       |       |       |       |      |       |
| 17 | Stomach or other digesti                   |       |       |       |       |       |       |       |      |       |
| 18 | ve disease                                 | 5.73  | 5.25  | 6.25  | 6.20  | 5.48  | 7.02  | 5.23  | 4.62 | 5.91  |
| 19 |                                            |       |       |       |       |       |       |       |      |       |
| 20 | Hypertension                               | 5.38  | 4.96  | 5.84  | 4.90  | 4.40  | 5.47  | 5.92  | 5.24 | 6.69  |
| 21 |                                            |       |       |       |       |       |       |       |      |       |
| 22 | Cancer or malignant                        |       |       |       |       |       |       |       |      |       |
| 23 | tumor                                      | 4.88  | 3.20  | 7.45  | 5.33  | 3.06  | 9.29  | 3.99  | 2.07 | 7.72  |
| 24 |                                            |       |       |       |       |       |       |       |      |       |
| 25 | Arthritis or rheumatism                    | 3.83  | 3.61  | 4.05  | 3.70  | 3.43  | 3.99  | 3.91  | 3.59 | 4.26  |
| 26 | <hr/>                                      |       |       |       |       |       |       |       |      |       |

### Common multimorbidity combinations

There were 804 possible comorbidity combinations that were identified in the MCC group after statistical analysis, including 72 dyads and 169 triads. The 10 most frequently occurring morbidity dyads and triads are presented respectively in [Table 3](#) and [Table 4](#).

**Table 3** Prevalence of the 10 most common morbidity dyads

| Rank | Morbidity dyads                                                | Prevalence      |        |       | Mean Age |
|------|----------------------------------------------------------------|-----------------|--------|-------|----------|
|      |                                                                | All respondents | female | male  |          |
| 1    | Arthritis or rheumatism and Stomach or other digestive disease | 4.73%           | 3.56%  | 5.96% | 69.20    |
| 2    | Arthritis or rheumatism and Hypertension                       | 2.85%           | 2.20%  | 3.53% | 71.25    |
| 3    | Arthritis or rheumatism and Chronic lung diseases              | 1.13%           | 1.22%  | 1.04% | 71.55    |
| 4    | Hypertension and heart problems                                | 1.03%           | 1.00%  | 1.06% | 71.80    |
| 5    | Hypertension and Stomach or other digestive disease            | 0.89%           | 0.83%  | 0.95% | 69.07    |
| 6    | Hypertension                                                   | 0.86%           | 0.81%  | 0.91% | 68.58    |

|    |                                  |       |       |       |       |
|----|----------------------------------|-------|-------|-------|-------|
|    | and Dyslipidemia                 |       |       |       |       |
|    | Arthritis                        |       |       |       |       |
| 7  | or rheumatism                    | 0.76% | 0.53% | 1.00% | 70.72 |
|    | and heart problems               |       |       |       |       |
|    | Arthritis                        |       |       |       |       |
| 8  | or rheumatism                    | 0.64% | 0.73% | 0.54% | 68.24 |
|    | and Kidney disease               |       |       |       |       |
|    | Hypertension                     |       |       |       |       |
| 9  | and Diabetes or high blood sugar | 0.58% | 0.50% | 0.67% | 70.97 |
|    | Chronic lung diseases and Asthma |       |       |       |       |
| 10 |                                  | 0.53% | 0.65% | 0.40% | 71.15 |

**Table 4** Prevalence of the 10 most common morbidity triads

| Rank | Morbidity triads                                                                      | Prevalence      |        |       | Mean Age |
|------|---------------------------------------------------------------------------------------|-----------------|--------|-------|----------|
|      |                                                                                       | All respondents | female | male  |          |
| 1    | Arthritis or rheumatism, Stomach or other digestive disease and Hypertension          | 1.19%           | 0.80%  | 1.60% | 70.96    |
| 2    | Arthritis or rheumatism, Stomach or other digestive disease and Chronic lung diseases | 0.82%           | 0.97%  | 0.67% | 70.82    |
| 3    | Arthritis or rheumatism, Heart disease and Hypertension                               | 0.63%           | 0.37%  | 0.91% | 69.93    |
| 4    | Arthritis or rheumatism, Heart disease and Stomach or other digestive disease         | 0.59%           | 0.25%  | 0.95% | 71.51    |
| 5    | Hypertension, Dyslipidemia and Arthritis or rheumatism                                | 0.44%           | 0.31%  | 0.57% | 70.13    |
| 6    | Hypertension, Dyslipidemia and Heart problems                                         | 0.42%           | 0.35%  | 0.49% | 71.17    |
| 7    | Arthritis or rheumatism, Kidney disease and Stomach or other digestive disease        | 0.42%           | 0.40%  | 0.44% | 70.14    |
| 8    | Arthritis or rheumatism, Asthma and Chronic lung diseases                             | 0.40%           | 0.46%  | 0.33% | 69.18    |
| 9    | Hypertension, Dyslipidemia and Diabetes or high blood sugar                           | 0.35%           | 0.35%  | 0.35% | 71.51    |
| 10   | Arthritis or rheumatism, Stomach or other digestive disease                           | 0.53%           | 0.57%  | 0.49% | 70.29    |

---

and Liver disease

---

Theoretically, there are 91 dyad combinations and 364 triad combinations possible given the 14 different chronic conditions considered in this study. However, only 72 types (79.12%) of dyads and 169 types (46.43%) of triads emerged in the sample. The 10 most frequently occurring morbidity dyads accounted for 69.01% of the 72 dyad combinations, and the proportion of the 10 most common triad combinations in the 169 triad combinations was 47.05%. Arthritis or rheumatism, which appeared in five of the top 10 dyad combinations and eight of the top 10 triad combinations of chronic conditions, was the main component of the leading morbidity dyads and triads.

There were significant gender differences observed in the occurrences of these multimorbidity combinations. The numbers of women with triad combinations of chronic diseases were generally higher than for men with the same morbidity triads. For example, women had significantly higher prevalence of arthritis and hypertension and hyperlipidemia than men (78.26% vs 21.74%). Among morbidity dyads, the prevalence of heart disease and arthritis or rheumatism in women was nearly two times higher than that in men, while the cluster of arthritis or rheumatism and kidney disease occurred more frequently in men than in women. No age difference was detected in the probability of these particular multimorbidity combinations occurring.

The O/E ratio was also used to analyze the multimorbidity pattern. [15] The higher the O/E value, the higher the probability of coexistence of chronic conditions. [16] Table 5 shows O/E ratios determined for the 10 most prevalent morbidity dyads and triads. The prevalence of each conditions and the dyad and triad prevalence are presented in Annex 2. In the midst of those triad combinations of chronic conditions, the two clusters with significantly higher O/E ratios were emotional, nervous, or psychiatric problems and stroke and memory-related disease (O/E ratio = 10287.72), emotional, nervous, or psychiatric problems and memory-related disorders and asthma (O/E ratio = 8498.56). These four conditions also dominated the three leading dyads

with the highest O/E ratios: 97.73 for the combination of emotional and mental disorders and memory- related diseases, 23.66 for the combination of stroke and memory related disease and 19.55 for the combination of memory-related disease and asthma.

**Table 5 O/E ratios for the 10 most prevalent morbidity dyads and triads**

| Number of chronic conditions | Rank | Chronic conditions                                                             | O/E ratio |
|------------------------------|------|--------------------------------------------------------------------------------|-----------|
| 2                            | 1    | Chronic lung diseases and Asthma                                               | 162.15    |
|                              | 2    | Emotional, nervous, or psychiatric problems and Memory-related disease         | 97.73     |
|                              | 3    | Dyslipidemia and Diabetes or high blood sugar                                  | 38.39     |
|                              | 4    | Heart disease and Memory-related disease                                       | 25.69     |
|                              | 5    | Stroke and Memory-related disease                                              | 23.66     |
|                              | 6    | Hypertension and Stroke                                                        | 22.85     |
|                              | 7    | Hypertension and Diabetes or high blood sugar                                  | 20.64     |
|                              | 8    | Cancer or malignant tumor and Stroke                                           | 19.55     |
|                              | 9    | Memory-related disease and Asthma                                              | 19.55     |
|                              | 10   | Stroke and Asthma                                                              | 19.55     |
| 3                            | 1    | Stroke, Emotional, nervous, or psychiatric problems and Memory-related disease | 10287.72  |
|                              | 2    | Emotional, nervous, or psychiatric problems, Memory-related disease and Asthma | 8498.56   |
|                              | 3    | Emotional, nervous, or psychiatric problems, Chronic lung diseases and Asthma  | 2274.26   |
|                              | 4    | Heart disease, Stroke and Memory-related disease                               | 2253.50   |
|                              | 5    | Chronic lung diseases, Heart disease and Asthma                                | 1992.69   |
|                              | 6    | Dyslipidemia, Heart disease and Memory-related disease                         | 1443.25   |
|                              | 7    | Hypertension, Dyslipidemia and Diabetes or high blood sugar                    | 1398.31   |

|    |                                                           |         |
|----|-----------------------------------------------------------|---------|
| 8  | Hypertension, Stroke and Memory-related disease           | 1387.35 |
| 9  | Chronic lung diseases, Memory-related disease and Asthma  | 1376.53 |
| 10 | Chronic lung diseases, Arthritis or rheumatism and Asthma | 1265.95 |

## DISCUSSION

This is the first study to estimate the prevalence and patterns of multimorbidity among the elderly in China based on the nationally representative data from CHARLS, which covered 11,707 Chinese senior citizens of age 60 and over. The results of the study indicated that 69.1% of the elderly population in China had at least one of the 14 diseases and 43.6% of them suffered from multimorbidity. The average age of the MCC group was 0.66 years higher than that of the non-MCC group and in the MCC group, the mean age of women was 0.12 years higher than that of men, which was comparable to the results of previous studies. [17-21]

The prevalence of multimorbidity estimated in this study was much lower than that from previous studies in other developed countries. For example, a study of 543 patients over age 65 in Ghent, Belgium showed that the multimorbidity rate was as high as 82.6%, [22]. Another study in Australia showed that 83.2% of the respondents suffered from multimorbidity. [23] However, it is difficult to compare the prevalence generated from different studies due to differences in the selected definitions of multimorbidity, demographic characteristics of the samples, and different study methodologies. [24-28]

In agreement with previous reports, arthritis or rheumatism, hypertension, stomach or other digestive disease were the most common diseases in the MCC group. [11] The prevalence of these three conditions was each above 20% in the entire sample, and above 45% in the MCC group. The most prevalent chronic combinations in the sample could also be found in other studies. [22] The results of this study showed that the prevalence of arthritis or rheumatism was high and easy to coexist with other conditions.



1  
2  
3  
4 In addition to the chronic conditions mentioned above, previous studies demonstrated  
5 that women with rheumatoid arthritis might have a predisposition to gallstones which  
6 could manifest in middle or older age compared with women in the general population.  
7  
8 This phenomenon could be related to chronic inflammation and HDL metabolism. [29]  
9  
10

11 Although arthritis or rheumatism, a component of all the leading three morbidity  
12 dyads and triads, was also the most commonly occurring disease in multimorbidity, the  
13 relative risk of this disease was only 4.65, the lowest in the 14 chronic diseases.  
14  
15 Moreover, arthritis or rheumatism is less common in morbidity clusters with large O/E  
16 ratios. Therefore, the frequent occurrence of arthritis or rheumatism in multimorbidity  
17 might be simply due to the high prevalence of the disease. Doctor-diagnosed arthritis  
18 is a common and disabling chronic condition in the world. During 2013 to 2015, an  
19 average of more than one in five (54.4 million) adults in the United States were  
20 diagnosed with arthritis [30]. The unadjusted prevalences of arthritis among adults with  
21 obesity, heart disease, or diabetes were 30.6%, 49.3%, and 47.1%, respectively. In  
22 adults with obesity, heart disease, or diabetes, the age-adjusted prevalences of arthritis  
23 were respectively 1.5, 1.7 and 1.9 times higher than those without these diseases.  
24  
25 Improving the health of adults with arthritis and related comorbid conditions calls for  
26 wider dissemination and implementation of evidence-based interventions, such as self-  
27 management education and physical activity promotion [31].  
28  
29  
30  
31  
32  
33  
34  
35  
36  
37  
38  
39  
40  
41

42 The relative risks for asthma, stroke, heart disease, and six other conditions were all  
43 above 10, which means that patients with these diseases were 10 times more likely to  
44 be afflicted by multimorbidity. These diseases also occurred at a high frequency in  
45 multimorbidity with high O/E ratios, such as the clusters of pulmonary disease and  
46 asthma, emotional and mental illness and memory-related disease, dyslipidemia and  
47 diabetes, and stroke and emotional or mental illness and memory-related disease.  
48  
49 Patients with these diseases were more likely to express comorbidity compared to those  
50 without these diseases, and thus should be the focus of future research studies.  
51  
52  
53  
54  
55  
56  
57

58 This study featured a nationally representative sample of the Chinese elderly  
59  
60

1  
2  
3  
4 population, which was crucial to get an overall understanding of multimorbidity among  
5 the elderly in China. However, there were also limitations with the data sample and  
6 study. For example, this study used data from the third wave report of CHARLS, a  
7 survey which was conducted in 2015, and there is accordingly a time lag to now that  
8 exists. Additionally, the chronic diseases included in the study were not comprehensive,  
9 since only 14 chronic conditions were included in the survey. Finally, the data obtained  
10 from the survey was based on self-reporting, which may have introduced some  
11 misclassification bias or other confounds. Later research on the prevalence and patterns  
12 of multimorbidity should be carried out in-depth with a more extensive survey of  
13 chronic disease.  
14  
15  
16  
17  
18  
19  
20  
21  
22  
23  
24  
25

## 26 CONCLUSIONS

27  
28 Multimorbidity remains an underexplored area of research in China. [32]. Despite  
29 the increasing prevalence of multimorbidity, there are no specific proposals for its  
30 diagnosis and treatment. [33] This study contributes to the understanding of the  
31 prevalence and patterns of comorbidity among the elderly in China. Considering  
32 China's aging population and the high prevalence of comorbidity in senior citizens, the  
33 elderly should be prioritized in the fields of disease prevention and health promotion.  
34  
35  
36  
37  
38  
39  
40  
41  
42  
43  
44

45 **Acknowledgements** The authors would like to thank the Chinese Center for Disease  
46 Control and Prevention and Peking University for access to China Health and  
47 Retirement Longitudinal Survey data.  
48  
49

50 **Contributors** RZ analyzed and interpreted data, drafted the manuscript, approved the  
51 final manuscript as submitted. YL revised the manuscript for important intellectual  
52 content. YLS analyzed and interpreted data and revised the manuscript for important  
53 intellectual content. FC helped on the study design and revised the manuscript.  
54  
55  
56  
57

58 **Funding** This work was funded by the National Natural Science Foundation of China  
59  
60

(7167030838).

**Competing interests** None declared.

**Patient consent** Obtained.

**Ethics approval** The original CHARLS was approved by the ethics review committee of Peking University, and all participants gave written informed consent at the time of participation

**Data sharing statement** No additional data are available

## REFERENCES

1. Barnett K, Mercer SW, Norbury M, et al. Epidemiology of multimorbidity and implications for health care, research, and medical education: a cross-sectional study. *Lancet* 2012; 380:37–43. doi:10.1016/S0140-6736(12)60240-2
2. World Health Organization. Global status report on noncommunicable diseases, 2014. <http://apps.who.int/nmh/publications/ncd-status-report-2014/en/index.html> (accessed 27 Oct 2017)
3. Lee J T, Hamid F, Pati S, et al. Impact of Noncommunicable Disease Multimorbidity on Healthcare Utilisation and Out-Of-Pocket Expenditures in Middle-Income Countries: Cross Sectional Analysis. *PLoS One* 2015;10:103-110. doi: 10.1371/journal.pone.0127199
4. Moffat K, Mercer SW. Challenges of managing people with multimorbidity in today's healthcare systems. *BMC Fam Prac* 2015;16:129. doi: 10.1186/s12875-015-0344-4
5. Schäfer Ingmar, von Leitner Eike-Christin, Schön Gerhard et al. Multimorbidity patterns in the elderly: a new approach of disease clustering identifies complex interrelations between chronic conditions. *PLoS One* 2010;12:e15941. doi: 10.1371/journal.pone.0015941
6. Atun R. Transitioning health systems for multimorbidity. *Lancet* 2015;386:721–2. doi: 10.1016/S0140-6736(14)62254-6

- 1  
2  
3  
4 7. Wolff JL, Starfield B, Anderson G. Prevalence, expenditures, and complications of  
5 multiple chronic conditions in the elderly. *Arch Intern Med* 2002;20: 2269-2276.doi:  
6 10.1001/archinte.162.20.2269  
7  
8
- 9  
10 8. Yang L, Wu M, Cui B, et al. Economic burden of cardiovascular diseases in China.  
11 *Expert Rev Pharmacoecon Outcomes Res*2008;8:349–56.doi:  
12 10.1586/14737167.8.4.349  
13  
14
- 15  
16 9. Zhao Y, Hu Y, Smith JP, et al. Cohort profile: the China Health and Retirement  
17 Longitudinal Study (CHARLS). *Int J Epidemiol* 2014;1:61-69.doi:  
18 10.1093/ije/dys203  
19  
20
- 21  
22 10. Van den Bussche H, Koller D, Kolonko T, et al. Which chronic diseases and disease  
23 combinations are specific to multimorbidity in the elderly? Results of a claims data  
24 based cross-sectional study in Germany. *BMC Public Health* 2011;11:101-110.doi:  
25 10.1186/1471-2458-11-101  
26  
27
- 28  
29 11. Viera AJ. Odds ratios and risk ratios: what's the difference and why does it matter?  
30 *South Med J* 2008; 7: 30-34.doi:10.1097/SMJ.0b013e31817a7ee4  
31  
32
- 33  
34 12. Vettore MV, Meira GF, Rebelo MA et al. Multimorbidity patterns of oral clinical  
35 conditions, social position, and oral health-related quality of life in a population-  
36 based survey of 12-yr-old children. *Eur J Oral Sci.*2016 ; 6:580-590. doi:  
37 10.1111/eos.12304. Epub 2016 Oct 8.  
38  
39
- 40  
41 13. Zhang J, Yu KF. What's the relative risk? A method of correcting the odds ratio in  
42 cohort studies of common outcomes. *JAMA*1998;19:1690-1691.doi:  
43 10.1001/jama.280.19.1690  
44  
45
- 46  
47 14. McNutt LA, Wu C, Xue X, et al. Estimating the Relative Risk in Cohort Studies  
48 and Clinical Trials of Common Outcomes. *Am J Epidemiol* 2003;10:940–943.doi:  
49 10.1002/cncr.30192  
50  
51
- 52  
53 15. Marengoni A, Rizzuto D, Wang HX, et al. Patterns of chronic multimorbidity in the  
54 elderly population. *J Am Geriatr Soc*2009;57:225–30.doi:10.1111/j.1532-  
55 5415.2008.02109.x  
56  
57  
58  
59  
60

- 1  
2  
3  
4 16. Best WR, Cowper DC. The Ratio of Observed-to-Expected Mortality as a Quality  
5 of Care Indicator in Non-Surgical VA Patients. *Med Care* 1994;4:390-400.doi:  
6 10.1097/00005650-199404000-00007  
7  
8
- 9  
10 17. Kastenholz KE, Weis M, Hagelstein C, et al. Correlation of Observed-to-Expected  
11 MRI Fetal Lung Volume and Ultrasound Lung-to-Head Ratio at Different  
12 Gestational Times in Fetuses With Congenital Diaphragmatic Hernia. *AJR Am J*  
13 *Roentgenol*2016;4:856-866.doi:10.2214/AJR.15.15018  
14  
15
- 16  
17 18. Melis R, Marengoni A, Angleman S, et al. Incidence and predictors of  
18 multimorbidity in the elderly: a population-based longitudinal study. *PLoS One*  
19 2014; 9: e103120.doi:10.1371/journal.pone.0103120  
20  
21
- 22  
23 19. Laan W, Bleijenberg N, Drubbel I, et al. Factors associated with increasing  
24 functional decline in multimorbid independently living older people. *Maturitas*  
25 2013; 75: 276–81.doi:10.1016/j.maturitas.2013.04.005  
26  
27
- 28  
29 20. Eckerblad J, Theander K, Ekdahl A, et al. To adjust and endure: a qualitative study  
30 of symptom burden in older people with multimorbidity. *Appl Nurs Res*  
31 2015;28:322–7.doi:10.1016/j.apnr.2015.03.008  
32  
33
- 34  
35 21. Wister A, Kendig H, Mitchell B, et al. Multimorbidity, health and aging in Canada  
36 and Australia: a tale of two countries. *BMC Geriatr*2016;1:163-176.doi:  
37 10.1186/s12877-016-0341-z  
38  
39
- 40  
41 22. Afshar S, Roderick PJ, Kowal P, et al. Multimorbidity and the inequalities of global  
42 ageing: a cross-sectional study of 28 countries using the World Health Surveys.  
43 *BMC Public Health*2015;15:776-786.doi:10.1186/s12889-015-2008-7  
44  
45
- 46  
47 23. Boeckxstaens P, Peersman W, Goubin G, et al. A practice-based analysis of  
48 combinations of diseases in patients aged 65 or older in primary care. *BMC Family*  
49 *Practice* 2014;1:1-6.doi: 10.1186/1471-2296-15-159.  
50  
51
- 52  
53 24. Britt HC , Harrison CM , Miller GC , et al . Prevalence and patterns of  
54 multimorbidity in Australia. *Med J Aust* 2008;2: 72-77  
55  
56
- 57  
58 25. Glynn LG , Valderas JM , Healy P , et al . The prevalence of multimorbidity in  
59 primary care and its effect on health care utilization and cost. *Fam Pract*  
60 2011;28:516–23.doi:10.1093/fampra/cmr013

- 1  
2  
3 26. Marengoni A , Angleman S , Melis R , et al . Aging with multimorbidity: a  
4 systematic review of the literature. *Ageing Res Rev* 2011;10:430–  
5 9. doi:10.1016/j.arr.2011.03.003  
6  
7  
8 27. Barnett K , Mercer SW , Norbury M , et al . Epidemiology of multimorbidity and  
9 implications for health care, research, and medical education: a cross-sectional  
10 study. *Lancet* 2012;380:37–43. doi:10.1016/S0140-6736(12)60240-2  
11  
12 28. Fortin M , Stewart M , Poitras ME , et al . A systematic review of prevalence studies  
13 on multimorbidity: toward a more uniform methodology. *Ann Fam Med*  
14 2012;10:142–51. doi:10.1370/afm.1337.  
15  
16 29. García-Gómez M C, De L E, Ordoñez-Palau S, et al. High Prevalence of Gallstone  
17 Disease in Rheumatoid Arthritis: A New Comorbidity Related to Dyslipidemia? [J].  
18 *Reumatol Clin*, 2017;14:294-300. doi: 10.1016/j.reuma.2018.03.012.  
19  
20 30. Barbour KE, Helmick CG, Boring M, et al. Vital Signs: Prevalence of Doctor-  
21 Diagnosed Arthritis and Arthritis-Attributable Activity Limitation — United States,  
22 2013–2015. *MMWR Morb Mortal Wkly Rep*, 2017;66:246–253. doi:  
23 http://dx.doi.org/10.15585/mmwr.mm6609e1.  
24  
25 31. Ward BW, Schiller JS. Prevalence of multiple chronic conditions among US adults:  
26 estimates from the National Health Interview Survey, 2010. *Prev Chronic Dis*  
27 2013;10:120203. doi: 10.5888/pcd10.120203  
28  
29 32. Bao W, Hu D, Shi X, et al. Comorbidity increased the risk of falls in Chinese older  
30 adults: A cross-sectional study. *Int J Clin Exp Med*, 2017;7:10753-10763.  
31  
32 33. Gao N, Yuan Z, Tang X, et al. Prevalence of CHD-related metabolic comorbidity  
33 of diabetes mellitus in Northern Chinese adults: the REACTION study. *J Diabetes*  
34 *Complications* 2016;2:199-205. doi:10.1016/j.jdiacomp.2015.11.018  
35  
36  
37  
38  
39  
40  
41  
42  
43  
44  
45  
46  
47  
48  
49  
50  
51  
52  
53  
54  
55  
56  
57  
58  
59  
60

## Figure legends

**Figure 1** Flowchart for selecting the study sample from the original sample population. CHARLS, China Health and Retirement Longitudinal Survey

**Figure 2** Frequency and percentage of people aged over 60 suffering from different diseases based on CHARLS data

**Figure 3** Prevalence Rates of chronic condition in elderly people over 60 years old based on CHARLS data

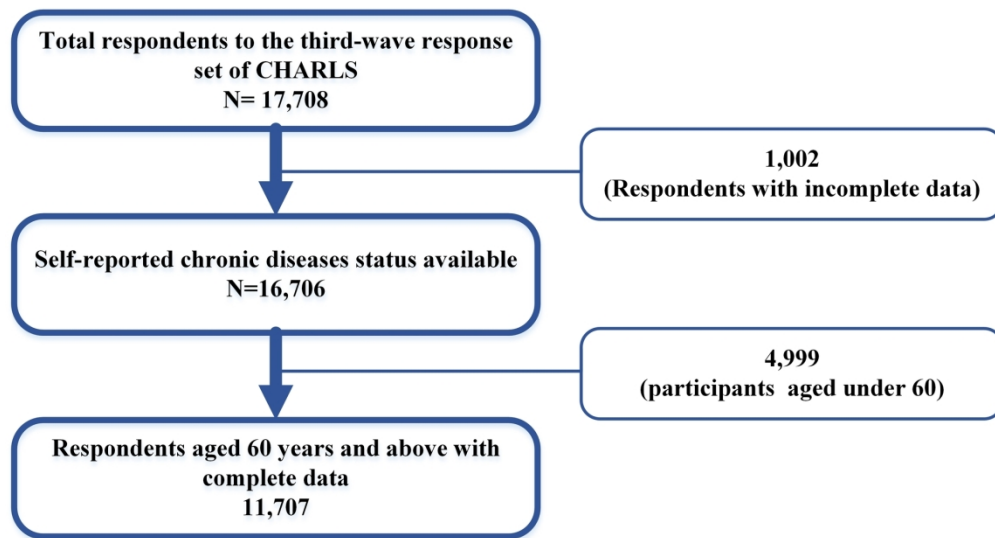

Figure 1 Flowchart for selecting the study sample from the original sample population. CHARLS, China Health and Retirement Longitudinal Survey

171x93mm (300 x 300 DPI)



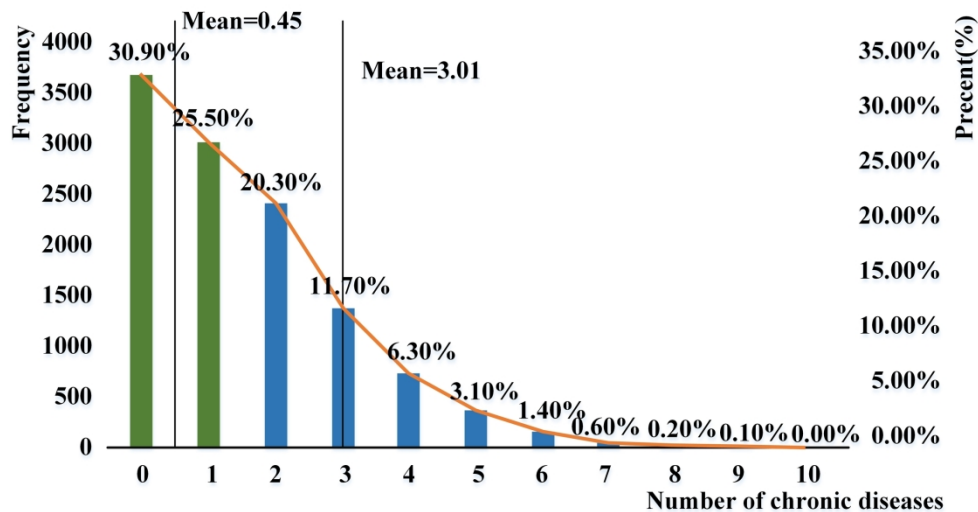

Figure 2 Frequency and percentage of people aged over 60 suffering from different diseases based on CHARLS data

222x119mm (300 x 300 DPI)

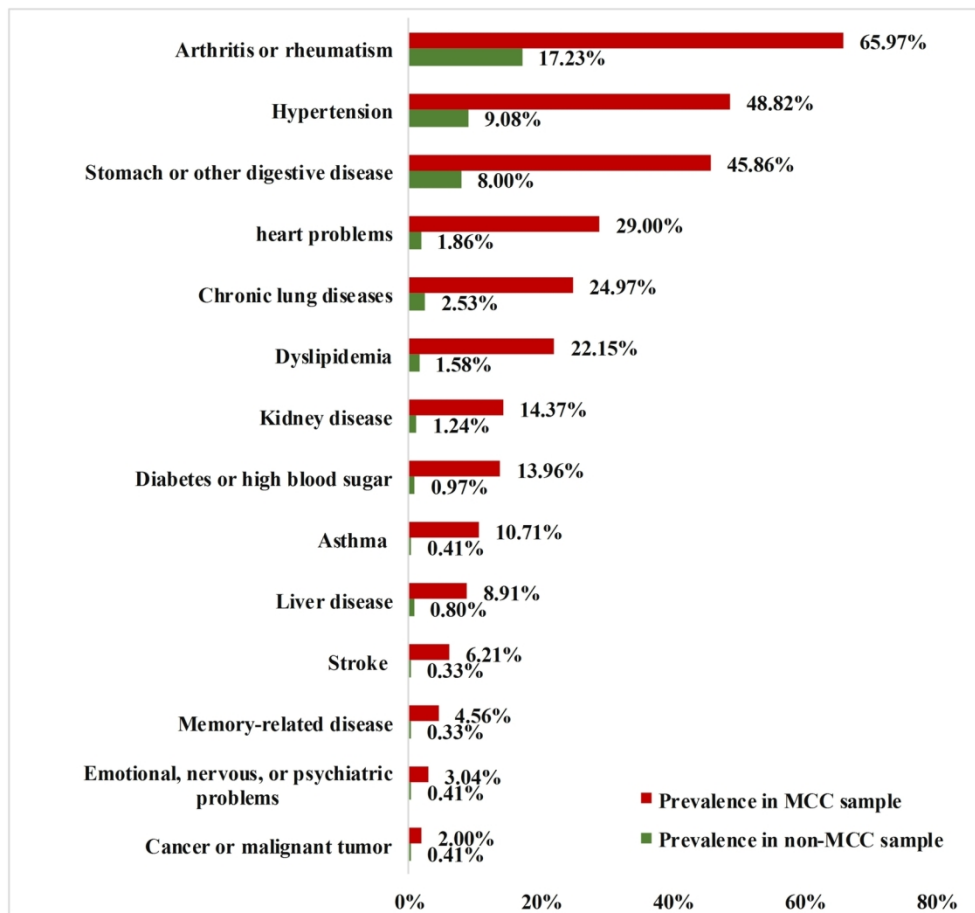

Figure 3 Prevalence Rates of chronic condition in elderly people over 60 years old based on CHARLS data

151x140mm (300 x 300 DPI)

**Annex 1 Sensitivity analysis, Comparison of the characteristics of complete samples and incomplete samples**

|                               | <b>Complete samples</b> | <b>Incomplete samples</b> | <b>P*</b> |
|-------------------------------|-------------------------|---------------------------|-----------|
| Number of people              | 11707                   | 876                       |           |
| Proportion (%)                | 93.04%                  | 6.96%                     |           |
| Mean age All respondents (SD) | 70.20(7.907)            | 69.60 (7.824)             | <0.001    |
| <b>Male</b> (SD)              | 69.97(7.575)            | 69.58 (7.721)             | <0.001    |
| <b>Female</b> (SD)            | 70.39(8.189)            | 69.62 (7.973)             | <0.001    |
| Gender (% females)            | 51.28%                  | 49.27%                    | 0.193     |

**Annex 2 O/E ratio of all binary and triads comorbidities pattern present in participants**

| Rank | binary comorbidities pattern                                           | O/E ratio |
|------|------------------------------------------------------------------------|-----------|
| 1    | Chronic lung diseases and Asthma                                       | 161.00    |
| 2    | Emotional, nervous, or psychiatric problems and Memory-related disease | 98.57     |
| 3    | Dyslipidemia and Diabetes or high blood sugar                          | 38.69     |
| 4    | Heart disease and Memory-related disease                               | 25.96     |
| 5    | Stroke and Memory-related disease                                      | 24.19     |
| 6    | Hypertension and Stroke                                                | 23.10     |
| 7    | Hypertension and Diabetes or high blood sugar                          | 20.77     |
| 8    | Cancer or malignant tumor and Stroke                                   | 19.71     |
| 9    | Memory-related disease and Asthma                                      | 19.71     |
| 10   | Stroke and Asthma                                                      | 19.71     |
| 11   | Hypertension and Heart disease                                         | 19.07     |
| 12   | Hypertension and Dyslipidemia                                          | 18.98     |
| 13   | Dyslipidemia and Heart disease                                         | 17.39     |
| 14   | Diabetes or high blood sugar and Heart disease                         | 14.87     |
| 15   | Diabetes or high blood sugar and Liver disease                         | 14.40     |
| 16   | Cancer or malignant tumor and Liver disease                            | 13.65     |
| 17   | Diabetes or high blood sugar and Kidney disease                        | 13.38     |
| 18   | Hypertension and Memory-related disease                                | 13.33     |
| 19   | Dyslipidemia and Cancer or malignant tumor                             | 12.51     |
| 20   | Stomach or other digestive disease and Arthritis or rheumatism         | 10.80     |
| 21   | Liver disease and Heart disease                                        | 10.49     |
| 22   | Dyslipidemia and Stroke                                                | 10.23     |
| 23   | Dyslipidemia and Stomach or other digestive disease                    | 9.81      |
| 24   | Dyslipidemia and Kidney disease                                        | 9.61      |
| 25   | Chronic lung diseases and Memory-related disease                       | 9.56      |
| 26   | Chronic lung diseases and Stroke                                       | 9.56      |
| 27   | Kidney disease and Arthritis or rheumatism                             | 9.42      |
| 28   | Heart disease and Kidney disease                                       | 9.29      |
| 29   | Chronic lung diseases and Heart disease                                | 9.12      |
| 30   | Stomach or other digestive disease and Asthma                          | 9.03      |
| 31   | Liver disease and Kidney disease                                       | 8.99      |
| 32   | Kidney disease and Stomach or other digestive disease                  | 8.92      |
| 33   | Memory-related disease and Arthritis or rheumatism                     | 8.89      |
| 34   | Stroke and Arthritis or rheumatism                                     | 8.89      |
| 35   | Arthritis or rheumatism and Asthma                                     | 8.77      |
| 36   | Liver disease and Memory-related disease                               | 8.38      |
| 37   | Diabetes or high blood sugar and Memory-related disease                | 8.32      |
| 38   | Diabetes or high blood sugar and Stroke                                | 8.32      |
| 39   | Chronic lung diseases and Arthritis or rheumatism                      | 8.14      |
| 40   | Heart disease and Stomach or other digestive disease                   | 8.11      |

|    |    |                                                                         |      |
|----|----|-------------------------------------------------------------------------|------|
| 1  |    |                                                                         |      |
| 2  |    |                                                                         |      |
| 3  | 41 | Heart disease and Arthritis or rheumatism                               | 7.45 |
| 4  |    |                                                                         |      |
| 5  | 42 | Stomach or other digestive disease and Emotional, nervous, or           | 7.39 |
| 6  |    | psychiatric problems                                                    |      |
| 7  | 43 | Liver disease and Stomach or other digestive disease                    | 7.33 |
| 8  | 44 | Diabetes or high blood sugar and Cancer or malignant tumor              | 6.78 |
| 9  | 45 | Diabetes or high blood sugar and Asthma                                 | 6.78 |
| 10 | 46 | Diabetes or high blood sugar and Arthritis or rheumatism                | 6.44 |
| 11 | 47 | Liver disease and Arthritis or rheumatism                               | 6.16 |
| 12 | 48 | Chronic lung diseases and Kidney disease                                | 5.98 |
| 13 | 49 | Chronic lung diseases and Stomach or other digestive disease            | 5.97 |
| 14 | 50 | Hypertension and Arthritis or rheumatism                                | 5.74 |
| 15 | 51 | Chronic lung diseases and Liver disease                                 | 5.52 |
| 16 | 52 | Kidney disease and Emotional, nervous, or psychiatric problems          | 5.29 |
| 17 | 53 | Kidney disease and Asthma                                               | 5.29 |
| 18 | 54 | Chronic lung diseases and Emotional, nervous, or psychiatric problems   | 5.19 |
| 19 | 55 | Dyslipidemia and Memory-related disease                                 | 5.12 |
| 20 | 56 | Hypertension and Emotional, nervous, or psychiatric problems            | 5.07 |
| 21 | 57 | Hypertension and Chronic lung diseases                                  | 5.03 |
| 22 | 58 | Hypertension and Kidney disease                                         | 5.01 |
| 23 | 59 | Cancer or malignant tumor and Arthritis or rheumatism                   | 4.96 |
| 24 | 60 | Cancer or malignant tumor and Stomach or other digestive disease        | 4.93 |
| 25 | 61 | Dyslipidemia and Arthritis or rheumatism                                | 4.75 |
| 26 | 62 | Hypertension and Liver disease                                          | 4.61 |
| 27 | 63 | Diabetes or high blood sugar and Chronic lung diseases                  | 4.38 |
| 28 | 64 | Heart disease and Stroke                                                | 4.33 |
| 29 | 65 | Dyslipidemia and Asthma                                                 | 4.17 |
| 30 | 66 | Hypertension and Stomach or other digestive disease                     | 3.85 |
| 31 | 67 | Cancer or malignant tumor and Heart disease                             | 3.53 |
| 32 | 68 | Heart disease and Asthma                                                | 3.53 |
| 33 | 69 | Emotional, nervous, or psychiatric problems and Arthritis or rheumatism | 3.43 |
| 34 | 70 | Diabetes or high blood sugar and Stomach or other digestive disease     | 3.12 |
| 35 | 71 | Hypertension and Cancer or malignant tumor                              | 2.17 |
| 36 | 72 | Hypertension and Asthma                                                 | 2.17 |
| 37 | 73 | Stomach or other digestive disease and Memory-related disease           | 2.02 |
| 38 | 74 | Stroke and Stomach or other digestive disease                           | 2.02 |
| 39 | 75 | Dyslipidemia and Liver disease                                          | 1.77 |
| 40 | 76 | Dyslipidemia and Chronic lung diseases                                  | 1.35 |
| 41 |    |                                                                         |      |
| 42 |    |                                                                         |      |
| 43 |    |                                                                         |      |
| 44 |    |                                                                         |      |
| 45 |    |                                                                         |      |
| 46 |    |                                                                         |      |
| 47 |    |                                                                         |      |
| 48 |    |                                                                         |      |
| 49 |    |                                                                         |      |
| 50 |    |                                                                         |      |
| 51 |    |                                                                         |      |
| 52 |    |                                                                         |      |
| 53 |    |                                                                         |      |
| 54 |    |                                                                         |      |
| 55 |    |                                                                         |      |
| 56 |    |                                                                         |      |
| 57 |    |                                                                         |      |
| 58 |    |                                                                         |      |
| 59 |    |                                                                         |      |
| 60 |    |                                                                         |      |

| Rank | triads comorbidities pattern                                                               | O/E ratio |
|------|--------------------------------------------------------------------------------------------|-----------|
| 1    | Stroke, Emotional, nervous, or psychiatric problems and Memory-related disease             | 10491.60  |
| 2    | Emotional, nervous, or psychiatric problems, Memory-related disease, Asthma,               | 8548.88   |
| 3    | Heart disease, Stroke and Memory-related disease                                           | 2302.62   |
| 4    | Chronic lung diseases, Emotional, nervous, or psychiatric problems and Asthma              | 2252.13   |
| 5    | Chronic lung diseases, Heart disease, Asthma,                                              | 1977.13   |
| 6    | Dyslipidemia, Heart disease and Memory-related disease                                     | 1461.04   |
| 7    | Hypertension, Stroke and Memory-related disease                                            | 1418.54   |
| 8    | Hypertension, Dyslipidemia and Diabetes or high blood sugar                                | 1409.29   |
| 9    | Chronic lung diseases, Memory-related disease and Asthma                                   | 1381.96   |
| 10   | Chronic lung diseases, Arthritis or rheumatism and Asthma                                  | 1256.63   |
| 11   | Dyslipidemia, Diabetes or high blood sugar and Kidney disease                              | 1255.51   |
| 12   | Cancer or malignant tumor, Chronic lung diseases and Asthma                                | 1126.07   |
| 13   | Chronic lung diseases, Kidney disease and Asthma                                           | 1112.24   |
| 14   | Liver disease, Kidney disease and Asthma                                                   | 974.52    |
| 15   | Dyslipidemia, Diabetes or high blood sugar and Liver disease                               | 972.21    |
| 16   | Chronic lung diseases, Liver disease and Asthma                                            | 956.96    |
| 17   | Dyslipidemia, Diabetes or high blood sugar and Stroke                                      | 935.99    |
| 18   | Chronic lung diseases, Stomach or other digestive disease and Asthma                       | 921.21    |
| 19   | Hypertension, Dyslipidemia and Heart disease                                               | 876.36    |
| 20   | Diabetes or high blood sugar, Liver disease and Kidney disease                             | 822.11    |
| 21   | Hypertension, Diabetes or high blood sugar and Stroke                                      | 812.58    |
| 22   | Hypertension, Chronic lung diseases and Asthma                                             | 812.01    |
| 23   | Hypertension, Dyslipidemia and Stroke                                                      | 800.07    |
| 24   | Dyslipidemia, Heart disease and Asthma                                                     | 793.67    |
| 25   | Diabetes or high blood sugar, Heart disease and Stroke                                     | 791.41    |
| 26   | Hypertension, Emotional, nervous, or psychiatric problems and Memory-related disease       | 770.58    |
| 27   | Dyslipidemia, Diabetes or high blood sugar and Cancer or malignant tumor                   | 762.67    |
| 28   | Dyslipidemia, Diabetes or high blood sugar and Emotional, nervous, or psychiatric problems | 762.67    |
| 29   | Dyslipidemia, Diabetes or high blood sugar and Heart disease                               | 669.54    |
| 30   | Liver disease, Heart disease and Emotional, nervous, or psychiatric problems               | 649.62    |
| 31   | Heart disease, Kidney disease and Memory-related disease                                   | 617.74    |
| 32   | Heart disease, Stroke and Kidney disease                                                   | 617.74    |
| 33   | Dyslipidemia, Chronic lung diseases and Asthma                                             | 584.58    |
| 34   | Diabetes or high blood sugar, Liver disease and Heart disease                              | 548.02    |

|    |                                                                                                            |        |
|----|------------------------------------------------------------------------------------------------------------|--------|
| 35 | Hypertension, Diabetes or high blood sugar and Heart disease                                               | 523.14 |
| 36 | Hypertension, Heart disease and Stroke                                                                     | 507.36 |
| 37 | Diabetes or high blood sugar, Chronic lung diseases and Asthma                                             | 474.98 |
| 38 | Liver disease, Stomach or other digestive disease and Asthma                                               | 454.02 |
| 39 | Stomach or other digestive disease, Emotional, nervous, or psychiatric problems and Memory-related disease | 437.10 |
| 40 | Hypertension, Memory-related disease, Asthma,                                                              | 385.29 |
| 41 | Diabetes or high blood sugar, Stomach or other digestive disease and Asthma                                | 300.46 |
| 42 | Hypertension, Dyslipidemia and Memory-related disease                                                      | 300.03 |
| 43 | Liver disease, Kidney disease and Arthritis or rheumatism                                                  | 277.66 |
| 44 | Hypertension, Heart disease and Memory-related disease                                                     | 253.68 |
| 45 | Dyslipidemia, Liver disease and Kidney disease                                                             | 252.95 |
| 46 | Hypertension, Chronic lung diseases and Stroke                                                             | 249.13 |
| 47 | Stroke, Memory-related disease and Arthritis or rheumatism                                                 | 249.11 |
| 48 | Dyslipidemia, Chronic lung diseases and Liver disease                                                      | 248.40 |
| 49 | Cancer or malignant tumor, Chronic lung diseases and Heart disease                                         | 247.14 |
| 50 | Chronic lung diseases, Heart disease and Emotional, nervous, or psychiatric problems                       | 247.14 |
| 51 | Hypertension, Dyslipidemia and Asthma                                                                      | 244.47 |
| 52 | Cancer or malignant tumor, Heart disease and Stomach or other digestive disease                            | 234.50 |
| 53 | Chronic lung diseases, Memory-related disease and Arthritis or rheumatism                                  | 229.69 |
| 54 | Chronic lung diseases, Stroke and Stomach or other digestive disease                                       | 211.98 |
| 55 | Hypertension, Stroke and Arthritis or rheumatism                                                           | 210.41 |
| 56 | Chronic lung diseases, Liver disease and Heart disease                                                     | 210.03 |
| 57 | Hypertension, Cancer or malignant tumor and Heart disease                                                  | 206.71 |
| 58 | Hypertension, Heart disease and Emotional, nervous, or psychiatric problems                                | 206.71 |
| 59 | Memory-related disease, Arthritis or rheumatism and Asthma                                                 | 202.98 |
| 60 | Emotional, nervous, or psychiatric problems, Memory-related disease and Arthritis or rheumatism            | 202.98 |
| 61 | Stroke, Emotional, nervous, or psychiatric problems and Arthritis or rheumatism                            | 202.98 |
| 62 | Stroke, Kidney disease and Arthritis or rheumatism                                                         | 200.49 |
| 63 | Dyslipidemia, Diabetes or high blood sugar and Stomach or other digestive disease                          | 194.98 |
| 64 | Liver disease, Stomach or other digestive disease and Memory-related disease                               | 185.73 |
| 65 | Dyslipidemia, Stomach or other digestive disease and Asthma                                                | 184.90 |
| 66 | Diabetes or high blood sugar, Stomach or other digestive disease and Memory-related disease                | 184.37 |
| 67 | Diabetes or high blood sugar, Heart disease and Arthritis or rheumatism                                    | 183.74 |

1  
2  
3  
4  
5  
6  
7  
8  
9  
10  
11  
12  
13  
14  
15  
16  
17  
18  
19  
20  
21  
22  
23  
24  
25  
26  
27  
28  
29  
30  
31  
32  
33  
34  
35  
36  
37  
38  
39  
40  
41  
42  
43  
44  
45  
46  
47  
48  
49  
50  
51  
52  
53  
54  
55  
56  
57  
58  
59  
60

---

|     |                                                                                                   |        |
|-----|---------------------------------------------------------------------------------------------------|--------|
| 68  | Chronic lung diseases, Stroke and Arthritis or rheumatism                                         | 164.06 |
| 69  | Kidney disease, Arthritis or rheumatism and Asthma                                                | 163.36 |
| 70  | Dyslipidemia, Diabetes or high blood sugar and Arthritis or rheumatism                            | 162.98 |
| 71  | Hypertension, Diabetes or high blood sugar and Memory-related disease                             | 162.52 |
| 72  | Hypertension, Dyslipidemia and Kidney disease                                                     | 160.98 |
| 73  | Hypertension, Heart disease and Kidney disease                                                    | 158.80 |
| 74  | Chronic lung diseases, Liver disease and Kidney disease                                           | 157.53 |
| 75  | Dyslipidemia, Liver disease and Stomach or other digestive disease                                | 157.13 |
| 76  | Heart disease, Kidney disease and Stomach or other digestive disease                              | 154.42 |
| 77  | Cancer or malignant tumor, Liver disease and Stomach or other digestive disease                   | 151.34 |
| 78  | Liver disease, Stomach or other digestive disease and Emotional, nervous, or psychiatric problems | 151.34 |
| 79  | Heart disease, Arthritis or rheumatism and Asthma                                                 | 145.20 |
| 80  | Stroke, Kidney disease and Stomach or other digestive disease                                     | 143.91 |
| 81  | Liver disease, Emotional, nervous, or psychiatric problems and Arthritis or rheumatism            | 140.56 |
| 82  | Diabetes or high blood sugar, Arthritis or rheumatism and Asthma                                  | 139.53 |
| 83  | Hypertension, Dyslipidemia and Liver disease                                                      | 138.50 |
| 84  | Hypertension, Heart disease and Asthma                                                            | 137.80 |
| 85  | Kidney disease, Stomach or other digestive disease and Arthritis or rheumatism                    | 136.43 |
| 86  | Chronic lung diseases, Emotional, nervous, or psychiatric problems and Arthritis or rheumatism    | 133.68 |
| 87  | Hypertension, Liver disease and Asthma                                                            | 133.40 |
| 88  | Hypertension, Diabetes or high blood sugar and Cancer or malignant tumor                          | 132.42 |
| 89  | Chronic lung diseases, Stomach or other digestive disease and Arthritis or rheumatism             | 131.24 |
| 90  | Hypertension, Diabetes or high blood sugar and Kidney disease                                     | 130.80 |
| 91  | Heart disease, Stomach or other digestive disease and Arthritis or rheumatism                     | 128.06 |
| 92  | Dyslipidemia, Heart disease and Stomach or other digestive disease                                | 121.74 |
| 93  | Hypertension, Heart disease and Arthritis or rheumatism                                           | 121.06 |
| 94  | Stomach or other digestive disease, Arthritis or rheumatism and Asthma                            | 118.39 |
| 95  | Chronic lung diseases, Heart disease and Arthritis or rheumatism                                  | 117.36 |
| 96  | Hypertension, Liver disease and Heart disease                                                     | 117.11 |
| 97  | Diabetes or high blood sugar, Kidney disease and Arthritis or rheumatism                          | 114.85 |
| 98  | Chronic lung diseases, Heart disease and Stomach or other digestive disease                       | 113.73 |
| 99  | Hypertension, Diabetes or high blood sugar and Liver disease                                      | 112.54 |
| 100 | Diabetes or high blood sugar, Chronic lung diseases and Heart disease                             | 104.24 |
| 101 | Liver disease, Stomach or other digestive disease and Arthritis or rheumatism                     | 104.21 |
| 102 | Stroke, Stomach or other digestive disease and Arthritis or rheumatism                            | 103.78 |

---



|    |     |                                                                                                  |
|----|-----|--------------------------------------------------------------------------------------------------|
| 1  |     |                                                                                                  |
| 2  |     |                                                                                                  |
| 3  |     |                                                                                                  |
| 4  | 103 | Hypertension, Kidney disease and Emotional, nervous, or psychiatric problems                     |
| 5  |     |                                                                                                  |
| 6  | 104 | Chronic lung diseases, Liver disease and Arthritis or rheumatism                                 |
| 7  | 105 | Hypertension, Dyslipidemia and Arthritis or rheumatism                                           |
| 8  | 106 | Liver disease, Kidney disease and Stomach or other digestive disease                             |
| 9  |     |                                                                                                  |
| 10 | 107 | Dyslipidemia, Cancer or malignant tumor and Stomach or other digestive disease                   |
| 11 |     |                                                                                                  |
| 12 | 108 | Dyslipidemia, Stomach or other digestive disease and Emotional, nervous, or psychiatric problems |
| 13 |     |                                                                                                  |
| 14 | 109 | Hypertension, Dyslipidemia and Chronic lung diseases                                             |
| 15 | 110 | Hypertension, Chronic lung diseases and Heart disease                                            |
| 16 | 111 | Heart disease, Stroke and Arthritis or rheumatism                                                |
| 17 | 112 | Hypertension, Heart disease and Stomach or other digestive disease                               |
| 18 | 113 | Chronic lung diseases, Heart disease and Kidney disease                                          |
| 19 | 114 | Chronic lung diseases, Kidney disease and Arthritis or rheumatism                                |
| 20 | 115 | Diabetes or high blood sugar, Chronic lung diseases and Arthritis or rheumatism                  |
| 21 |     |                                                                                                  |
| 22 | 116 | Chronic lung diseases, Kidney disease and Stomach or other digestive disease                     |
| 23 |     |                                                                                                  |
| 24 | 117 | Hypertension, Diabetes or high blood sugar and Arthritis or rheumatism                           |
| 25 | 118 | Hypertension, Dyslipidemia and Stomach or other digestive disease                                |
| 26 | 119 | Chronic lung diseases, Liver disease and Stomach or other digestive disease                      |
| 27 |     |                                                                                                  |
| 28 | 120 | Hypertension, Memory-related disease and Arthritis or rheumatism                                 |
| 29 | 121 | Stomach or other digestive disease, Memory-related disease and Arthritis or rheumatism           |
| 30 | 122 | Heart disease, Kidney disease and Arthritis or rheumatism                                        |
| 31 | 123 | Liver disease, Arthritis or rheumatism and Asthma                                                |
| 32 | 124 | Diabetes or high blood sugar, Cancer or malignant tumor and Arthritis or rheumatism              |
| 33 | 125 | Kidney disease, Memory-related disease and Arthritis or rheumatism                               |
| 34 | 126 | Dyslipidemia, Heart disease and Arthritis or rheumatism                                          |
| 35 | 127 | Diabetes or high blood sugar, Heart disease and Stomach or other digestive disease               |
| 36 |     |                                                                                                  |
| 37 | 128 | Dyslipidemia, Chronic lung diseases and Heart disease                                            |
| 38 | 129 | Hypertension, Kidney disease and Arthritis or rheumatism                                         |
| 39 | 130 | Dyslipidemia, Stomach or other digestive disease and Arthritis or rheumatism                     |
| 40 |     |                                                                                                  |
| 41 | 131 | Hypertension, Chronic lung diseases and Memory-related disease                                   |
| 42 | 132 | Dyslipidemia, Kidney disease and Stomach or other digestive disease                              |
| 43 | 133 | Hypertension, Stroke and Stomach or other digestive disease                                      |
| 44 | 134 | Cancer or malignant tumor, Chronic lung diseases and Stomach or other digestive disease          |
| 45 |     |                                                                                                  |
| 46 |     |                                                                                                  |
| 47 |     |                                                                                                  |
| 48 |     |                                                                                                  |
| 49 |     |                                                                                                  |
| 50 |     |                                                                                                  |
| 51 |     |                                                                                                  |
| 52 |     |                                                                                                  |
| 53 |     |                                                                                                  |
| 54 |     |                                                                                                  |
| 55 |     |                                                                                                  |
| 56 |     |                                                                                                  |
| 57 |     |                                                                                                  |
| 58 |     |                                                                                                  |
| 59 |     |                                                                                                  |
| 60 |     |                                                                                                  |

|    |     |                                                                                                                   |
|----|-----|-------------------------------------------------------------------------------------------------------------------|
| 1  |     |                                                                                                                   |
| 2  |     |                                                                                                                   |
| 3  |     |                                                                                                                   |
| 4  | 135 | Cancer or malignant tumor, Chronic lung diseases and Arthritis or rheumatism 53.47                                |
| 5  |     |                                                                                                                   |
| 6  | 136 | Hypertension, Stomach or other digestive disease and Arthritis or rheumatism 52.98                                |
| 7  |     |                                                                                                                   |
| 8  | 137 | Dyslipidemia, Memory-related disease and Arthritis or rheumatism 52.69                                            |
| 9  | 138 | Dyslipidemia, Stroke and Arthritis or rheumatism 52.69                                                            |
| 10 | 139 | Hypertension, Cancer or malignant tumor and Chronic lung diseases 50.75                                           |
| 11 | 140 | Hypertension, Chronic lung diseases and Kidney disease 50.13                                                      |
| 12 | 141 | Liver disease, Heart disease and Arthritis or rheumatism 46.27                                                    |
| 13 | 142 | Hypertension, Cancer or malignant tumor and Arthritis or rheumatism 44.73                                         |
| 14 | 143 | Hypertension, Liver disease and Kidney disease 43.92                                                              |
| 15 | 144 | Hypertension, Chronic lung diseases and Liver disease 43.13                                                       |
| 16 | 145 | Dyslipidemia, Cancer or malignant tumor and Arthritis or rheumatism 42.93                                         |
| 17 | 146 | Dyslipidemia, Arthritis or rheumatism and Asthma 42.93                                                            |
| 18 | 147 | Hypertension, Diabetes or high blood sugar and Chronic lung diseases 42.81                                        |
| 19 | 148 | Dyslipidemia, Kidney disease and Arthritis or rheumatism 42.40                                                    |
| 20 | 149 | Stomach or other digestive disease, Emotional, nervous, or psychiatric problems and Arthritis or rheumatism 42.28 |
| 21 | 150 | Hypertension, Liver disease and Arthritis or rheumatism 41.18                                                     |
| 22 | 151 | Hypertension, Stomach or other digestive disease and Memory-related disease 39.40                                 |
| 23 | 152 | Diabetes or high blood sugar, Stomach or other digestive disease and Arthritis or rheumatism 39.24                |
| 24 | 153 | Hypertension, Arthritis or rheumatism and Asthma 37.27                                                            |
| 25 | 154 | Dyslipidemia, Liver disease and Arthritis or rheumatism 36.48                                                     |
| 26 | 155 | Heart disease, Emotional, nervous, or psychiatric problems and Arthritis or rheumatism 36.30                      |
| 27 | 156 | Hypertension, Chronic lung diseases and Arthritis or rheumatism 34.95                                             |
| 28 | 157 | Dyslipidemia, Chronic lung diseases and Arthritis or rheumatism 34.70                                             |
| 29 | 158 | Hypertension, Diabetes or high blood sugar and Stomach or other digestive disease 33.85                           |
| 30 | 159 | Cancer or malignant tumor, Stomach or other digestive disease and Arthritis or rheumatism 33.83                   |
| 31 | 160 | Liver disease, Heart disease and Stomach or other digestive disease 33.21                                         |
| 32 | 161 | Dyslipidemia, Chronic lung diseases and Stomach or other digestive disease 29.89                                  |
| 33 | 162 | Diabetes or high blood sugar, Liver disease and Arthritis or rheumatism 29.64                                     |
| 34 | 163 | Hypertension, Kidney disease and Stomach or other digestive disease 26.42                                         |
| 35 | 164 | Diabetes or high blood sugar, Chronic lung diseases and Stomach or other digestive disease 24.29                  |
| 36 | 165 | Hypertension, Emotional, nervous, or psychiatric problems and Arthritis or rheumatism 22.36                       |
| 37 | 166 | Hypertension, Liver disease and Stomach or other digestive disease 20.46                                          |
| 38 |     |                                                                                                                   |
| 39 |     |                                                                                                                   |
| 40 |     |                                                                                                                   |
| 41 |     |                                                                                                                   |
| 42 |     |                                                                                                                   |
| 43 |     |                                                                                                                   |
| 44 |     |                                                                                                                   |
| 45 |     |                                                                                                                   |
| 46 |     |                                                                                                                   |
| 47 |     |                                                                                                                   |
| 48 |     |                                                                                                                   |
| 49 |     |                                                                                                                   |
| 50 |     |                                                                                                                   |
| 51 |     |                                                                                                                   |
| 52 |     |                                                                                                                   |
| 53 |     |                                                                                                                   |
| 54 |     |                                                                                                                   |
| 55 |     |                                                                                                                   |
| 56 |     |                                                                                                                   |
| 57 |     |                                                                                                                   |
| 58 |     |                                                                                                                   |
| 59 |     |                                                                                                                   |
| 60 |     |                                                                                                                   |

|    |     |                                                                                                  |
|----|-----|--------------------------------------------------------------------------------------------------|
| 1  |     |                                                                                                  |
| 2  |     |                                                                                                  |
| 3  |     |                                                                                                  |
| 4  | 167 | Hypertension, Cancer or malignant tumor and Stomach or other digestive disease                   |
| 5  |     |                                                                                                  |
| 6  | 168 | Hypertension, Stomach or other digestive disease and Emotional, nervous, or psychiatric problems |
| 7  |     |                                                                                                  |
| 8  |     |                                                                                                  |
| 9  | 169 | Hypertension, Chronic lung diseases and Stomach or other digestive disease                       |
| 10 |     |                                                                                                  |
| 11 |     |                                                                                                  |
| 12 |     |                                                                                                  |
| 13 |     |                                                                                                  |
| 14 |     |                                                                                                  |
| 15 |     |                                                                                                  |
| 16 |     |                                                                                                  |
| 17 |     |                                                                                                  |
| 18 |     |                                                                                                  |
| 19 |     |                                                                                                  |
| 20 |     |                                                                                                  |
| 21 |     |                                                                                                  |
| 22 |     |                                                                                                  |
| 23 |     |                                                                                                  |
| 24 |     |                                                                                                  |
| 25 |     |                                                                                                  |
| 26 |     |                                                                                                  |
| 27 |     |                                                                                                  |
| 28 |     |                                                                                                  |
| 29 |     |                                                                                                  |
| 30 |     |                                                                                                  |
| 31 |     |                                                                                                  |
| 32 |     |                                                                                                  |
| 33 |     |                                                                                                  |
| 34 |     |                                                                                                  |
| 35 |     |                                                                                                  |
| 36 |     |                                                                                                  |
| 37 |     |                                                                                                  |
| 38 |     |                                                                                                  |
| 39 |     |                                                                                                  |
| 40 |     |                                                                                                  |
| 41 |     |                                                                                                  |
| 42 |     |                                                                                                  |
| 43 |     |                                                                                                  |
| 44 |     |                                                                                                  |
| 45 |     |                                                                                                  |
| 46 |     |                                                                                                  |
| 47 |     |                                                                                                  |
| 48 |     |                                                                                                  |
| 49 |     |                                                                                                  |
| 50 |     |                                                                                                  |
| 51 |     |                                                                                                  |
| 52 |     |                                                                                                  |
| 53 |     |                                                                                                  |
| 54 |     |                                                                                                  |
| 55 |     |                                                                                                  |
| 56 |     |                                                                                                  |
| 57 |     |                                                                                                  |
| 58 |     |                                                                                                  |
| 59 |     |                                                                                                  |
| 60 |     |                                                                                                  |

For peer review only

# BMJ Open

## Prevalence and patterns of multimorbidity among the elderly in China: a cross-sectional study using national survey data

|                                 |                                                                                                                                                                                                                                                                                                                                                                                                                                                                                                 |
|---------------------------------|-------------------------------------------------------------------------------------------------------------------------------------------------------------------------------------------------------------------------------------------------------------------------------------------------------------------------------------------------------------------------------------------------------------------------------------------------------------------------------------------------|
| Journal:                        | <i>BMJ Open</i>                                                                                                                                                                                                                                                                                                                                                                                                                                                                                 |
| Manuscript ID                   | bmjopen-2018-024268.R3                                                                                                                                                                                                                                                                                                                                                                                                                                                                          |
| Article Type:                   | Research                                                                                                                                                                                                                                                                                                                                                                                                                                                                                        |
| Date Submitted by the Author:   | 27-Apr-2019                                                                                                                                                                                                                                                                                                                                                                                                                                                                                     |
| Complete List of Authors:       | zhang, ran; China Pharmaceutical University, School of International Pharmaceutical Business<br>Lu, Yun; China Pharmaceutical University, School of International Pharmaceutical Business<br>Shi, Liuyan; China Pharmaceutical University, School of International Pharmaceutical Business<br>Zhang, SongLin; China Pharmaceutical University, School of International Pharmaceutical Business<br>Chang, Feng; China Pharmaceutical University, School of International Pharmaceutical Business |
| <b>Primary Subject Heading</b>: | Health informatics                                                                                                                                                                                                                                                                                                                                                                                                                                                                              |
| Secondary Subject Heading:      | Public health, Qualitative research                                                                                                                                                                                                                                                                                                                                                                                                                                                             |
| Keywords:                       | multimorbidity, cross-sectional study, Prevalence, Observed-to-expected ratio, China                                                                                                                                                                                                                                                                                                                                                                                                            |
|                                 |                                                                                                                                                                                                                                                                                                                                                                                                                                                                                                 |

SCHOLARONE™  
Manuscripts

1  
2  
3  
4 **Prevalence and patterns of multimorbidity among the elderly**  
5  
6 **in China: a cross-sectional study using national survey data**  
7  
8

9 **Author**

10 **NAME: Ran Zhang**

11 **Postal address: 639 Longmian Road, Nanjing, Jiangsu Province, CHINA**

12 **E-mail: ranzai7@126.com**

13 **Institutions: China Pharmaceutical University**

14 **City & Country: Jiangsu Province, CHINA**

15 **Telephone: +86-18115161231**

16 **Co-Authors**

17 **NAME: Yun Lu, Liuyan Shi, Songlin Zhang**

18 **Institutions: China Pharmaceutical University**

19 **City & Country: Jiangsu Province, CHINA**

20 **Corresponding Author**

21 **NAME: Feng Chang**

22 **Postal address: 639 Longmian Road, Nanjing, Jiangsu Province, CHINA**

23 **E-mail: cpucf@163.com**

24 **Institutions: China Pharmaceutical University**

25 **City & Country: Jiangsu Province, CHINA**

26 **Telephone: +86-13805153128**

27 **Keywords:**

28 **multimorbidity, Cross-sectional study, Prevalence, Observed-to-expected ratio,**

29 **China**

30 **Word count: 4911**

## ABSTRACT

**Objectives:** Examination of the prevalence and patterns of multimorbidity among the elderly in China.

**Design:** Cross-sectional study.

**Setting:** More than 10,000 households in 28 of the 34 provinces of mainland China.

**Participants:** 11,707 Chinese adults aged 60 and over.

**Primary outcome measures:** Prevalence and patterns of multimorbidity among the participants. Relative risks were calculated to estimate the probability of up to 14 chronic conditions coexisting with each other. Observed-to-expected (O/E) ratios were used to analyze the patterns of multimorbidity.

**Results:** Multimorbidity was present in 43.6% of respondents from the sample population, with women having the greater prevalence compared to men. There were 804 different comorbidity combinations identified, including 76 dyad combinations and 169 triad combinations. The top 10 morbidity dyads and triads accounted for 69.01% and 47.05% of the total dyad and triad combinations observed, respectively. Among the 14 chronic conditions included in the study, asthma, stroke, heart attack and six other chronic conditions were the main components of multimorbidity due to their high relative risk ratios. The most frequently occurring clusters with higher O/E ratios were stroke along with emotional, nervous, or psychiatric problems; memory-related diseases together emotional, nervous, or psychiatric problems; and memory-related diseases and asthma accompanied by chronic lung diseases and asthma.

**Conclusions:** The results of this study highlight the high prevalence of multimorbidity in the elderly population in China. Further studies are required to understand the etiology of multimorbidity, and future primary healthcare policies should be made while taking multimorbidity into consideration.

## Strengths and limitations of this study

### Strengths

- This is the first study to estimate the prevalence and patterns of multimorbidity among the elderly population in China.
- Data for this study were collected from a nationally representative longitudinal survey of 17,708 Chinese residents.

### Limitations

- Only 14 predefined chronic diseases were included in the study, and these may not be comprehensive of the conditions of the population.
- The data analyzed from the CHARLS were originally collected by population self-reporting, not clinician evaluation, and could partially reflect some associated biases or confounds.
- This study only included older patients aged 60 years and above with complete data, and there was no selection bias between the inclusion cases and exclusion cases, but further research would be needed in other populations.

## INTRODUCTION

Multimorbidity, or the simultaneous occurrence of two or more chronic conditions in an individual, is becoming increasingly common, and this has been reported to increase progressively with age. [1, 2] At present, with China's aging population having an increasing prevalence of chronic conditions, multimorbidity among the elderly poses an enormous societal cost due to increased mortality rates and healthcare utilization. [3] However, to date, research on chronic conditions in China has focused on single disease states, and the coexistence of multiple chronic conditions has not been investigated systematically and thoroughly.

There is a significant difference in the etiological analysis between patients with single chronic conditions and those with multimorbidity. [4] The coexistence of chronic conditions in a patient is more than a random event, it is more typically due to the causal relationship between some diseases and shared pathogenic factors. [5, 6] Moreover, the interactions between diseases or between a disease and host result in differences in the severity of multimorbidity and functional status and prognosis of patients with multimorbidity. [7] Consequently, it is imperative to begin research on multimorbidity in China for the cost-effective treatments that the results may help to suggest. [8] The purpose of this study was therefore to determine the prevalence of multimorbidity among the elderly in China and to reveal morbidity combinations, which may benefit the design and implementation of a modified healthcare system with consideration for patients with multimorbidity.

## METHODS

### Data source

Data for this study were collected from the third response of the China Health and Retirement Longitudinal Survey (CHARLS), which is the most current data available. The CHARLS is a nationally representative longitudinal survey of Chinese residents aged 45 and older that was conducted by the Chinese Center for Disease Control and Prevention, along with Peking University, to help China to adjust to the rapid aging of its population through the evaluation of social, economic, and health circumstances on



1  
2  
3 the community level using data collected by interviews, physical measurements and  
4 blood sample collection. [9] The national baseline survey began in 2011 and involved  
5 17,708 respondents from 150 county-level units, 450 village-level units, and  
6 approximately 10,000 households. Afterwards, CHARLS respondents were followed  
7 every second year, with their informed consent, and the study was approved by the  
8 Peking University Biomedical Ethics Committee (IRB00001052-14013-exemption).  
9  
10  
11  
12  
13

### 14 15 **Variables**

16  
17 The core CHARLS questionnaires included sections requesting information on  
18 demographic factors, family structure and changes, health status and functioning,  
19 healthcare and insurance, work, retirement and pension, income and consumption, and  
20 assets (individual and household). Information was collected by interview by trained  
21 staff. For the current study, the eligible and included participants were determined by  
22 being aged 60 and over, and data on gender, age and health status was used from the  
23 general health status and disease history section of senior citizens in the 2015 CHARLS  
24 data. This information included the following 14 common chronic health problems:  
25 hypertension, dyslipidemia (high blood lipids or low cholesterol), diabetes or elevated  
26 blood glucose (including impaired glucose tolerance and fasting blood glucose), cancer  
27 (excluding mild skin cancers), chronic lung disease such as chronic bronchitis or  
28 emphysema, pulmonary heart disease (excluding tumors or cancer), liver disease (other  
29 than fatty liver, tumors, or cancer), heart disease (such as myocardial infarction,  
30 coronary heart disease, angina pectoris, congestive heart failure and other heart  
31 diseases), stroke, kidney disease (excluding tumors or cancer), stomach or other  
32 digestive diseases (excluding tumors or cancer), emotional and mental problems,  
33 memory-related diseases (such as Alzheimer's disease, brain atrophy, Parkinson's  
34 disease), arthritis or rheumatism, and asthma. All these data were based on self-reports.  
35 Accordingly, multimorbidity was defined as the coexistence of more than one of the 14  
36 chronic conditions, with acute or subacute forms of certain conditions being excluded  
37 in this study due to the CHARLS data collection protocol.  
38  
39  
40  
41  
42  
43  
44  
45  
46  
47  
48  
49  
50  
51  
52  
53  
54

### 55 **Statistical analysis**

56 To detect the demographic characteristics of patients with multimorbidity,  
57 respondents were divided into two groups: those with multiple chronic conditions  
58 (MCC group) and those without multiple chronic conditions (Non-MCC group).  
59  
60

1  
2  
3 Descriptive statistics were calculated and expressed as means (SD) and frequencies  
4 (percentage). We applied the T<sup>2</sup> and  $\chi^2$  tests to test the differences in age, gender and  
5 the mean number of chronic conditions across different subgroups. Respective  
6 prevalence in the MCC group and the non-MCC group were calculated separately.  
7  
8 Given the exclusion of participants with incomplete data, a sensitivity analysis was  
9 conducted to compare the characteristics of the complete cases aged 60 years and above  
10 and the counterpart in the incomplete cases, which is presented in [Annex 1](#).  
11  
12  
13  
14

15 To determine the most common combination of chronic diseases, the prevalence of  
16 morbidity and multimorbidity dyads and triads were estimated, respectively. Next, the  
17 expected number of patients with a chronic disease were calculated, and the observed-  
18 to-expected (O/E) ratios were determined by dividing the number of patients in those  
19 groups by the expected number of patients. Observed-to-expected ratios were used to  
20 estimate the conditional probability of coexistence of two or three chronic conditions.  
21 [10] As an important indicator for assessing the correlation between diseases, the O/E  
22 ratio has been used in many areas of comorbidity. [10, 11] The relative risk of  
23 comorbidity for individual chronic conditions was also calculated. Relative risk of  
24 comorbidity (RR) is the ratio of the number of people with a certain chronic condition  
25 who suffer from multimorbidity to the number of patients with the same disease who  
26 do not suffer from multimorbidity. [11, 12] In other words, a higher RR value means a  
27 higher probability that the disease coexists with other diseases. However, it should be  
28 noted that there is no direct relationship between the relative risk of comorbidity and  
29 the overall prevalence of the diseases. [13, 14]  
30  
31  
32  
33  
34  
35  
36  
37  
38  
39  
40

41 All analyses in this study were completed using Stata software V.14.0 for Windows  
42 (Stata Corp). P Values <0.05 were considered to be statistically significant.  
43  
44  
45

#### 46 **Patient and public involvement**

47 Patients and the public were not involved in the development of the research  
48 question or outcome measures of the study, nor were they involved in study design and  
49 execution. There are no plans to disseminate the research results to study participants.  
50  
51  
52  
53

## 54 **RESULTS**

### 55 **Characteristics of participants**

56 The data were gathered from the third response set of CHARLS. After exclusion  
57  
58  
59  
60

of participants with incomplete data (1,002) or aged under 60 (9,259), there were 11,707 respondents with available information on related chronic diseases that were included in this study. The selection process of study sample is shown in Figure 1. The demographic characteristics of sample respondents and statistical significance test results are presented in Table 1.

Overall, the mean age for the sample population was 70.5 (ranging from 60 to 107). The sample population consisted of 5,705 (48.7%) males and 6002 (51.2%) females, and 43.6% of them suffered from multimorbidity. The median of chronic conditions in the MCC group was 3.01, compared to 0.45 in the Non-MCC group. Samples in the MCC group were 0.66 year older than those belonged to the non-MCC group. Gender differences with regard to the age of samples between the MCC group and the non-MCC group (70.57 for MCC group and 69.51 for non-MCC group) were small but statistically significant ( $p < 0.001$ ). The prevalence of multimorbidity in the female population was higher than that for the males (54.41% vs 45.59%). Figure 2 shows the number and proportion of respondents over 60 according to morbidity numbers. It can be seen that among all the participants aged over 60, only 30.9% of them did not have the 14 chronic diseases and 43.6% suffer from multimorbidity.

**Table 1. Demographic characteristics of all respondents, the MCC group and non-MCC group**

|                                   | All respondent | MCC group    | Non-MCC group | P*     |
|-----------------------------------|----------------|--------------|---------------|--------|
| Number of people                  | 11707          | 5107         | 6600          |        |
| Proportion (%)                    | 100%           | 43.62%       | 56.38%        |        |
| Mean age                          |                |              |               |        |
| All respondents (SD)              | 70.20(7.907)   | 70.57(7.701) | 69.91(8.051)  | <0.001 |
| <b>Male</b> (SD)                  | 69.97(7.575)   | 70.50(7.348) | 69.60(7.707)  | <0.001 |
| <b>Female</b> (SD)                | 70.39(8.189)   | 70.62(7.892) | 70.19(8.359)  | <0.001 |
| Gender (% females)                | 51.28%         | 54.41%       | 48.83%        | <0.001 |
| Mean number of chronic conditions |                |              |               |        |
| All respondents (SD)              | 1.57(1.560)    | 3.01(1.259)  | 0.45(0.498)   | <0.001 |
| <b>Male</b> (SD)                  | 1.47(1.534)    | 2.98(1.265)  | 0.44(0.496)   | <0.001 |
| <b>Female</b> (SD)                | 1.65(1.581)    | 3.03(7.982)  | 0.47(0.499)   | <0.001 |

SD = standard deviation;

p\* = statistical significance of the difference between the MCC and the non-MCC sample (t-tests were performed for comparison of means, and chi-square-tests for differences between percentages)

### Prevalence of chronic conditions

The prevalence of chronic conditions in the entire sample, the MCC group and the non-MCC group are shown in Figure 3. The prevalence of all fourteen chronic conditions in the MCC group was significantly higher than that in the entire sample. For instance, the prevalence of arthritis or rheumatism, hypertension, stomach or other digestive disease, heart disease and chronic lung disease were 65.97%, 48.82%, 45.86%, 29.00% and 24.97% in the MCC group, compared to 38.49%, 26.41%, 24.52%, 12.32% and 12.32% in the entire sample, respectively.

Table 2 shows the relative risks of comorbidity determined for the 14 chronic diseases reported in this study. It can be seen that the overall relative risks for asthma, stroke, heart disease and six other conditions were all above 10, which meant these diseases were >10 times easier to coexist with other chronic conditions and result in multimorbidity. In addition, the relative risks for certain diseases were positively associated with gender. For example, men had significantly higher relative risks for asthma, but lower relative risks for diabetes or high blood sugar, compared to women.

**Table 2 Relative risks of multimorbidity for different chronic conditions according to gender**

| Chronic conditions                          | All respondents | 95% Confidence Interval |             | Female | 95% Confidence Interval |             | Male  | 95% Confidence Interval |             |  |
|---------------------------------------------|-----------------|-------------------------|-------------|--------|-------------------------|-------------|-------|-------------------------|-------------|--|
|                                             |                 | Lower Bound             | Upper Bound |        | Lower Bound             | Upper Bound |       | Lower Bound             | Upper Bound |  |
|                                             |                 |                         |             |        |                         |             |       |                         |             |  |
| <b>High relative risk of multimorbidity</b> |                 |                         |             |        |                         |             |       |                         |             |  |
| Asthma                                      | 26.18           | 17.82                   | 38.46       | 20.67  | 11.85                   | 36.06       | 32.68 | 19.18                   | 55.67       |  |
| Stroke                                      | 18.62           | 12.11                   | 28.64       | 21.57  | 10.61                   | 43.86       | 17.43 | 10.13                   | 29.99       |  |
| Heart disease                               | 15.56           | 12.99                   | 18.63       | 16.48  | 12.80                   | 21.21       | 14.26 | 11.02                   | 18.46       |  |
| Diabetes or high blood sugar                | 14.40           | 11.18                   | 18.55       | 15.68  | 10.86                   | 22.63       | 13.11 | 9.24                    | 18.62       |  |

|    |                                            |       |       |       |       |       |       |       |      |       |
|----|--------------------------------------------|-------|-------|-------|-------|-------|-------|-------|------|-------|
| 1  |                                            |       |       |       |       |       |       |       |      |       |
| 2  |                                            |       |       |       |       |       |       |       |      |       |
| 3  |                                            |       |       |       |       |       |       |       |      |       |
| 4  | Dyslipidemia                               | 14.05 | 11.54 | 17.12 | 15.13 | 11.37 | 20.14 | 12.97 | 9.86 | 17.05 |
| 5  | Memory-related disease                     | 13.69 | 8.85  | 21.16 | 34.17 | 12.63 | 92.44 | 9.28  | 5.66 | 15.21 |
| 6  |                                            |       |       |       |       |       |       |       |      |       |
| 7  | Kidney disease                             | 11.57 | 9.24  | 14.49 | 15.01 | 10.17 | 22.43 | 10.24 | 7.78 | 13.48 |
| 8  |                                            |       |       |       |       |       |       |       |      |       |
| 9  | Liver disease                              | 11.10 | 8.37  | 14.71 | 16.07 | 9.70  | 26.63 | 9.15  | 6.49 | 12.89 |
| 10 | Chronic lung diseases                      | 9.87  | 8.43  | 11.55 | 10.71 | 8.26  | 13.88 | 9.74  | 8.00 | 11.86 |
| 11 |                                            |       |       |       |       |       |       |       |      |       |
| 12 | <b>Low relative risk of multimorbidity</b> |       |       |       |       |       |       |       |      |       |
| 13 |                                            |       |       |       |       |       |       |       |      |       |
| 14 | Emotional, nervous, or                     |       |       |       |       |       |       |       |      |       |
| 15 | psychiatric problems                       | 7.42  | 4.94  | 11.15 | 6.24  | 3.78  | 10.30 | 9.36  | 4.65 | 18.85 |
| 16 |                                            |       |       |       |       |       |       |       |      |       |
| 17 | Stomach or other digesti                   |       |       |       |       |       |       |       |      |       |
| 18 | ve disease                                 | 5.73  | 5.25  | 6.25  | 6.20  | 5.48  | 7.02  | 5.23  | 4.62 | 5.91  |
| 19 |                                            |       |       |       |       |       |       |       |      |       |
| 20 | Hypertension                               | 5.38  | 4.96  | 5.84  | 4.90  | 4.40  | 5.47  | 5.92  | 5.24 | 6.69  |
| 21 |                                            |       |       |       |       |       |       |       |      |       |
| 22 | Cancer or malignant                        |       |       |       |       |       |       |       |      |       |
| 23 | tumor                                      | 4.88  | 3.20  | 7.45  | 5.33  | 3.06  | 9.29  | 3.99  | 2.07 | 7.72  |
| 24 |                                            |       |       |       |       |       |       |       |      |       |
| 25 | Arthritis or rheumatism                    | 3.83  | 3.61  | 4.05  | 3.70  | 3.43  | 3.99  | 3.91  | 3.59 | 4.26  |
| 26 |                                            |       |       |       |       |       |       |       |      |       |
| 27 |                                            |       |       |       |       |       |       |       |      |       |
| 28 |                                            |       |       |       |       |       |       |       |      |       |
| 29 |                                            |       |       |       |       |       |       |       |      |       |
| 30 |                                            |       |       |       |       |       |       |       |      |       |
| 31 |                                            |       |       |       |       |       |       |       |      |       |
| 32 |                                            |       |       |       |       |       |       |       |      |       |
| 33 |                                            |       |       |       |       |       |       |       |      |       |
| 34 |                                            |       |       |       |       |       |       |       |      |       |
| 35 |                                            |       |       |       |       |       |       |       |      |       |
| 36 |                                            |       |       |       |       |       |       |       |      |       |
| 37 |                                            |       |       |       |       |       |       |       |      |       |
| 38 |                                            |       |       |       |       |       |       |       |      |       |
| 39 |                                            |       |       |       |       |       |       |       |      |       |
| 40 |                                            |       |       |       |       |       |       |       |      |       |
| 41 |                                            |       |       |       |       |       |       |       |      |       |
| 42 |                                            |       |       |       |       |       |       |       |      |       |
| 43 |                                            |       |       |       |       |       |       |       |      |       |
| 44 |                                            |       |       |       |       |       |       |       |      |       |
| 45 |                                            |       |       |       |       |       |       |       |      |       |
| 46 |                                            |       |       |       |       |       |       |       |      |       |
| 47 |                                            |       |       |       |       |       |       |       |      |       |
| 48 |                                            |       |       |       |       |       |       |       |      |       |
| 49 |                                            |       |       |       |       |       |       |       |      |       |
| 50 |                                            |       |       |       |       |       |       |       |      |       |
| 51 |                                            |       |       |       |       |       |       |       |      |       |
| 52 |                                            |       |       |       |       |       |       |       |      |       |
| 53 |                                            |       |       |       |       |       |       |       |      |       |
| 54 |                                            |       |       |       |       |       |       |       |      |       |
| 55 |                                            |       |       |       |       |       |       |       |      |       |
| 56 |                                            |       |       |       |       |       |       |       |      |       |
| 57 |                                            |       |       |       |       |       |       |       |      |       |
| 58 |                                            |       |       |       |       |       |       |       |      |       |
| 59 |                                            |       |       |       |       |       |       |       |      |       |
| 60 |                                            |       |       |       |       |       |       |       |      |       |

### Common multimorbidity combinations

There were 804 possible comorbidity combinations that were identified in the MCC group after statistical analysis, including 72 dyads and 169 triads. The 10 most frequently occurring morbidity dyads and triads are presented respectively in [Table 3](#) and [Table 4](#).

**Table 3** Prevalence of the 10 most common morbidity dyads

| Rank | Morbidity dyads                                                | Prevalence      |        |       | Mean Age |
|------|----------------------------------------------------------------|-----------------|--------|-------|----------|
|      |                                                                | All respondents | female | male  |          |
| 1    | Arthritis or rheumatism and Stomach or other digestive disease | 4.73%           | 3.56%  | 5.96% | 69.20    |
| 2    | Arthritis or rheumatism and Hypertension                       | 2.85%           | 2.20%  | 3.53% | 71.25    |
| 3    | Arthritis or rheumatism and Chronic lung diseases              | 1.13%           | 1.22%  | 1.04% | 71.55    |
| 4    | Hypertension and heart problems                                | 1.03%           | 1.00%  | 1.06% | 71.80    |
| 5    | Hypertension and Stomach or other digestive disease            | 0.89%           | 0.83%  | 0.95% | 69.07    |
| 6    | Hypertension                                                   | 0.86%           | 0.81%  | 0.91% | 68.58    |

|    |                                  |       |       |       |       |
|----|----------------------------------|-------|-------|-------|-------|
|    | and Dyslipidemia                 |       |       |       |       |
|    | Arthritis                        |       |       |       |       |
| 7  | or rheumatism                    | 0.76% | 0.53% | 1.00% | 70.72 |
|    | and heart problems               |       |       |       |       |
|    | Arthritis                        |       |       |       |       |
| 8  | or rheumatism                    | 0.64% | 0.73% | 0.54% | 68.24 |
|    | and Kidney disease               |       |       |       |       |
|    | Hypertension                     |       |       |       |       |
| 9  | and Diabetes or high blood sugar | 0.58% | 0.50% | 0.67% | 70.97 |
|    | Chronic lung diseases and Asthma |       |       |       |       |
| 10 |                                  | 0.53% | 0.65% | 0.40% | 71.15 |

**Table 4** Prevalence of the 10 most common morbidity triads

| Rank | Morbidity triads                                                                      | Prevalence      |        |       | Mean Age |
|------|---------------------------------------------------------------------------------------|-----------------|--------|-------|----------|
|      |                                                                                       | All respondents | female | male  |          |
| 1    | Arthritis or rheumatism, Stomach or other digestive disease and Hypertension          | 1.19%           | 0.80%  | 1.60% | 70.96    |
| 2    | Arthritis or rheumatism, Stomach or other digestive disease and Chronic lung diseases | 0.82%           | 0.97%  | 0.67% | 70.82    |
| 3    | Arthritis or rheumatism, Heart disease and Hypertension                               | 0.63%           | 0.37%  | 0.91% | 69.93    |
| 4    | Arthritis or rheumatism, Heart disease and Stomach or other digestive disease         | 0.59%           | 0.25%  | 0.95% | 71.51    |
| 5    | Hypertension, Dyslipidemia and Arthritis or rheumatism                                | 0.44%           | 0.31%  | 0.57% | 70.13    |
| 6    | Hypertension, Dyslipidemia and Heart problems                                         | 0.42%           | 0.35%  | 0.49% | 71.17    |
| 7    | Arthritis or rheumatism, Kidney disease and Stomach or other digestive disease        | 0.42%           | 0.40%  | 0.44% | 70.14    |
| 8    | Arthritis or rheumatism, Asthma and Chronic lung diseases                             | 0.40%           | 0.46%  | 0.33% | 69.18    |
| 9    | Hypertension, Dyslipidemia and Diabetes or high blood sugar                           | 0.35%           | 0.35%  | 0.35% | 71.51    |
| 10   | Arthritis or rheumatism, Stomach or other digestive disease                           | 0.53%           | 0.57%  | 0.49% | 70.29    |

---

and Liver disease

---

Theoretically, there are 91 dyad combinations and 364 triad combinations possible given the 14 different chronic conditions considered in this study. However, only 72 types (79.12%) of dyads and 169 types (46.43%) of triads emerged in the sample. The 10 most frequently occurring morbidity dyads accounted for 69.01% of the 72 dyad combinations, and the proportion of the 10 most common triad combinations in the 169 triad combinations was 47.05%. Arthritis or rheumatism, which appeared in five of the top 10 dyad combinations and eight of the top 10 triad combinations of chronic conditions, was the main component of the leading morbidity dyads and triads.

There were significant gender differences observed in the occurrences of these multimorbidity combinations. The numbers of women with triad combinations of chronic diseases were generally higher than for men with the same morbidity triads. For example, women had significantly higher prevalence of arthritis and hypertension and hyperlipidemia than men (78.26% vs 21.74%). Among morbidity dyads, the prevalence of heart disease and arthritis or rheumatism in women was nearly two times higher than that in men, while the cluster of arthritis or rheumatism and kidney disease occurred more frequently in men than in women. No age difference was detected in the probability of these particular multimorbidity combinations occurring.

The O/E ratio was also used to analyze the multimorbidity pattern. [15] The higher the O/E value, the higher the probability of coexistence of chronic conditions. [16] Table 5 shows O/E ratios determined for the 10 most prevalent morbidity dyads and triads. The prevalence of each conditions and the dyad and triad prevalence are presented in Annex 2. In the midst of those triad combinations of chronic conditions, the two clusters with significantly higher O/E ratios were emotional, nervous, or psychiatric problems and stroke and memory-related disease (O/E ratio = 10287.72), emotional, nervous, or psychiatric problems and memory-related disorders and asthma (O/E ratio = 8498.56). These four conditions also dominated the three leading dyads

with the highest O/E ratios: 97.73 for the combination of emotional and mental disorders and memory- related diseases, 23.66 for the combination of stroke and memory related disease and 19.55 for the combination of memory-related disease and asthma.

**Table 5 O/E ratios for the 10 most prevalent morbidity dyads and triads**

| Number of chronic conditions | Rank | Chronic conditions                                                             | O/E ratio |
|------------------------------|------|--------------------------------------------------------------------------------|-----------|
| 2                            | 1    | Chronic lung diseases and Asthma                                               | 162.15    |
|                              | 2    | Emotional, nervous, or psychiatric problems and Memory-related disease         | 97.73     |
|                              | 3    | Dyslipidemia and Diabetes or high blood sugar                                  | 38.39     |
|                              | 4    | Heart disease and Memory-related disease                                       | 25.69     |
|                              | 5    | Stroke and Memory-related disease                                              | 23.66     |
|                              | 6    | Hypertension and Stroke                                                        | 22.85     |
|                              | 7    | Hypertension and Diabetes or high blood sugar                                  | 20.64     |
|                              | 8    | Cancer or malignant tumor and Stroke                                           | 19.55     |
|                              | 9    | Memory-related disease and Asthma                                              | 19.55     |
|                              | 10   | Stroke and Asthma                                                              | 19.55     |
| 3                            | 1    | Stroke, Emotional, nervous, or psychiatric problems and Memory-related disease | 10287.72  |
|                              | 2    | Emotional, nervous, or psychiatric problems, Memory-related disease and Asthma | 8498.56   |
|                              | 3    | Emotional, nervous, or psychiatric problems, Chronic lung diseases and Asthma  | 2274.26   |
|                              | 4    | Heart disease, Stroke and Memory-related disease                               | 2253.50   |
|                              | 5    | Chronic lung diseases, Heart disease and Asthma                                | 1992.69   |
|                              | 6    | Dyslipidemia, Heart disease and Memory-related disease                         | 1443.25   |
|                              | 7    | Hypertension, Dyslipidemia and Diabetes or high blood sugar                    | 1398.31   |



|    |                                                           |         |
|----|-----------------------------------------------------------|---------|
| 8  | Hypertension, Stroke and Memory-related disease           | 1387.35 |
| 9  | Chronic lung diseases, Memory-related disease and Asthma  | 1376.53 |
| 10 | Chronic lung diseases, Arthritis or rheumatism and Asthma | 1265.95 |

## DISCUSSION

This is the first study to estimate the prevalence and patterns of multimorbidity among the elderly in China based on the nationally representative data from CHARLS, which covered 11,707 Chinese senior citizens of age 60 and over. The results of the study indicated that 69.1% of the elderly population in China had at least one of the 14 diseases and 43.6% of them suffered from multimorbidity. The average age of the MCC group was 0.66 years higher than that of the non-MCC group and in the MCC group, the mean age of women was 0.12 years higher than that of men, which was comparable to the results of previous studies. [17-21]

The prevalence of multimorbidity estimated in this study was much lower than that from previous studies in other developed countries. For example, a study of 543 patients over age 65 in Ghent, Belgium showed that the multimorbidity rate was as high as 82.6%, [22]. Another study in Australia showed that 83.2% of the respondents suffered from multimorbidity. [23] However, it is difficult to compare the prevalence generated from different studies due to differences in the selected definitions of multimorbidity, demographic characteristics of the samples, and different study methodologies. [24-28]

In agreement with previous reports, arthritis or rheumatism, hypertension, stomach or other digestive disease were the most common diseases in the MCC group. [11] The prevalence of these three conditions was each above 20% in the entire sample, and above 45% in the MCC group. The most prevalent chronic combinations in the sample could also be found in other studies. [22] The results of this study showed that the prevalence of arthritis or rheumatism was high and easy to coexist with other conditions.

1  
2  
3  
4 In addition to the chronic conditions mentioned above, previous studies demonstrated  
5 that women with rheumatoid arthritis might have a predisposition to gallstones which  
6 could manifest in middle or older age compared with women in the general population.  
7  
8 This phenomenon could be related to chronic inflammation and HDL metabolism. [29]  
9  
10

11 Although arthritis or rheumatism, a component of all the leading three morbidity  
12 dyads and triads, was also the most commonly occurring disease in multimorbidity, the  
13 relative risk of this disease was only 4.65, the lowest in the 14 chronic diseases.  
14 Moreover, arthritis or rheumatism is less common in morbidity clusters with large O/E  
15 ratios. Therefore, the frequent occurrence of arthritis or rheumatism in multimorbidity  
16 might be simply due to the high prevalence of the disease. Doctor-diagnosed arthritis  
17 is a common and disabling chronic condition in the world. During 2013 to 2015, an  
18 average of more than one in five (54.4 million) adults in the United States were  
19 diagnosed with arthritis [30]. The unadjusted prevalences of arthritis among adults with  
20 obesity, heart disease, or diabetes were 30.6%, 49.3%, and 47.1%, respectively. In  
21 adults with obesity, heart disease, or diabetes, the age-adjusted prevalences of arthritis  
22 were respectively 1.5, 1.7 and 1.9 times higher than those without these diseases.  
23 Improving the health of adults with arthritis and related comorbid conditions calls for  
24 wider dissemination and implementation of evidence-based interventions, such as self-  
25 management education and physical activity promotion [31].  
26  
27  
28  
29  
30  
31  
32  
33  
34  
35  
36  
37  
38  
39  
40  
41

42 The relative risks for asthma, stroke, heart disease, and six other conditions were all  
43 above 10, which means that patients with these diseases were 10 times more likely to  
44 be afflicted by multimorbidity. These diseases also occurred at a high frequency in  
45 multimorbidity with high O/E ratios, such as the clusters of pulmonary disease and  
46 asthma, emotional and mental illness and memory-related disease, dyslipidemia and  
47 diabetes, and stroke and emotional or mental illness and memory-related disease.  
48 Patients with these diseases were more likely to express comorbidity compared to those  
49 without these diseases, and thus should be the focus of future research studies.  
50  
51  
52  
53  
54  
55  
56  
57

58 This study featured a nationally representative sample of the Chinese elderly  
59  
60

1  
2  
3  
4 population, which was crucial to get an overall understanding of multimorbidity among  
5 the elderly in China. However, there were also limitations with the data sample and  
6 study. For example, this study used data from the third wave report of CHARLS, a  
7 survey which was conducted in 2015, and there is accordingly a time lag to now that  
8 exists. Additionally, the chronic diseases included in the study were not comprehensive,  
9 since only 14 chronic conditions were included in the survey. Finally, the data obtained  
10 from the survey was based on self-reporting, which may have introduced some  
11 misclassification bias or other confounds. Later research on the prevalence and patterns  
12 of multimorbidity should be carried out in-depth with a more extensive survey of  
13 chronic disease.  
14  
15  
16  
17  
18  
19  
20  
21  
22  
23  
24  
25

## 26 CONCLUSIONS

27  
28 Multimorbidity remains an underexplored area of research in China. [32]. Despite  
29 the increasing prevalence of multimorbidity, there are no specific proposals for its  
30 diagnosis and treatment. [33] This study contributes to the understanding of the  
31 prevalence and patterns of comorbidity among the elderly in China. Considering  
32 China's aging population and the high prevalence of comorbidity in senior citizens, the  
33 elderly should be prioritized in the fields of disease prevention and health promotion.  
34  
35  
36  
37  
38  
39  
40  
41  
42  
43  
44

45 **Acknowledgements** The authors would like to thank the Chinese Center for Disease  
46 Control and Prevention and Peking University for access to China Health and  
47 Retirement Longitudinal Survey data.  
48  
49

50 **Contributors** RZ analyzed and interpreted data, drafted the manuscript, approved the  
51 final manuscript as submitted. YL revised the manuscript for important intellectual  
52 content. YLS analyzed and interpreted data and revised the manuscript for important  
53 intellectual content. SLZ analyzed and checked the data of the full text. FC helped on  
54 the study design and revised the manuscript.  
55  
56  
57  
58  
59  
60

**Funding** This work was funded by the National Natural Science Foundation of China (7167030838).

**Competing interests** None declared.

**Patient consent** Obtained.

**Ethics approval** The original CHARLS was approved by the ethics review committee of Peking University, and all participants gave written informed consent at the time of participation

**Data sharing statement** No additional data are available

## REFERENCES

1. Barnett K, Mercer SW, Norbury M, et al. Epidemiology of multimorbidity and implications for health care, research, and medical education: a cross-sectional study. *Lancet* 2012; 380:37–43.doi:10.1016/S0140-6736(12)60240-2
2. World Health Organization. Global status report on noncommunicable diseases, 2014.<http://apps.who.int/nmh/publications/ncd-status-report-2014/en/index.html> (accessed 27 Oct 2017)
3. Lee J T, Hamid F, Pati S, et al. Impact of Noncommunicable Disease Multimorbidity on Healthcare Utilisation and Out-Of-Pocket Expenditures in Middle-Income Countries: Cross Sectional Analysis. *PLoS One* 2015;10:103-110. doi: 10.1371/journal.pone.0127199
4. Moffat K, Mercer SW. Challenges of managing people with multimorbidity in today's healthcare systems. *BMC Fam Prac* 2015;16:129.doi: 10.1186/s12875-015-0344-4
5. Schäfer Ingmar, von Leitner Eike-Christin, Schön Gerhard et al. Multimorbidity patterns in the elderly: a new approach of disease clustering identifies complex interrelations between chronic conditions. *PLoS One* 2010;12:e15941.doi: 10.1371/journal.pone.0015941
6. Atun R. Transitioning health systems for multimorbidity. *Lancet* 2015;386:721–

- 1  
2  
3  
4 2.doi: 10.1016/S0140-6736(14)62254-6  
5  
6 7. Wolff JL, Starfield B, Anderson G. Prevalence, expenditures, and complications of  
7 multiple chronic conditions in the elderly. *Arch Intern Med* 2002;20: 2269-2276.doi:  
8 10.1001/archinte.162.20.2269  
9  
10  
11 8. Yang L, Wu M, Cui B, et al. Economic burden of cardiovascular diseases in China.  
12 *Expert Rev Pharmacoecon Outcomes Res*2008;8:349–56.doi:  
13 10.1586/14737167.8.4.349  
14  
15  
16 9. Zhao Y, Hu Y, Smith JP, et al. Cohort profile: the China Health and Retirement  
17 Longitudinal Study (CHARLS). *Int J Epidemiol* 2014;1:61-69.doi:  
18 10.1093/ije/dys203  
19  
20  
21 10. Van den Bussche H, Koller D, Kolonko T, et al. Which chronic diseases and disease  
22 combinations are specific to multimorbidity in the elderly? Results of a claims data  
23 based cross-sectional study in Germany. *BMC Public Health* 2011;11:101-110.doi:  
24 10.1186/1471-2458-11-101  
25  
26  
27 11. Viera AJ. Odds ratios and risk ratios: what's the difference and why does it matter?  
28 *South Med J* 2008; 7: 30-34.doi:10.1097/SMJ.0b013e31817a7ee4  
29  
30  
31 12. Vettore MV, Meira GF, Rebelo MA et al. Multimorbidity patterns of oral clinical  
32 conditions, social position, and oral health-related quality of life in a population-  
33 based survey of 12-yr-old children. *Eur J Oral Sci.*2016 ; 6:580-590. doi:  
34 10.1111/eos.12304. Epub 2016 Oct 8.  
35  
36  
37 13. Zhang J, Yu KF. What's the relative risk? A method of correcting the odds ratio in  
38 cohort studies of common outcomes. *JAMA*1998;19:1690-1691.doi:  
39 10.1001/jama.280.19.1690  
40  
41  
42 14. McNutt LA, Wu C, Xue X, et al. Estimating the Relative Risk in Cohort Studies  
43 and Clinical Trials of Common Outcomes. *Am J Epidemiol* 2003;10:940–943.doi:  
44 10.1002/cncr.30192  
45  
46  
47 15. Marengoni A, Rizzuto D, Wang HX, et al. Patterns of chronic multimorbidity in the  
48 elderly population. *J Am Geriatr Soc*2009;57:225–30.doi:10.1111/j.1532-  
49  
50  
51  
52  
53  
54  
55  
56  
57  
58  
59  
60

- 1  
2  
3  
4 5415.2008.02109.x  
5  
6 16. Best WR, Cowper DC. The Ratio of Observed-to-Expected Mortality as a Quality  
7 of Care Indicator in Non-Surgical VA Patients. *Med Care* 1994;4:390-400.doi:  
8 10.1097/00005650-199404000-00007  
9  
10  
11 17. Kastenholz KE, Weis M, Hagelstein C, et al. Correlation of Observed-to-Expected  
12 MRI Fetal Lung Volume and Ultrasound Lung-to-Head Ratio at Different  
13 Gestational Times in Fetuses With Congenital Diaphragmatic Hernia. *AJR Am J*  
14 *Roentgenol*2016;4:856-866.doi:10.2214/AJR.15.15018  
15  
16  
17  
18  
19 18. Melis R, Marengoni A, Angleman S, et al. Incidence and predictors of  
20 multimorbidity in the elderly: a population-based longitudinal study. *PLoS One*  
21 2014; 9: e103120.doi:10.1371/journal.pone.0103120  
22  
23  
24  
25 19. Laan W, Bleijenberg N, Drubbel I, et al. Factors associated with increasing  
26 functional decline in multimorbid independently living older people. *Maturitas*  
27 2013; 75: 276–81.doi:10.1016/j.maturitas.2013.04.005  
28  
29  
30  
31 20. Eckerblad J, Theander K, Ekdahl A, et al. To adjust and endure: a qualitative study  
32 of symptom burden in older people with multimorbidity. *Appl Nurs Res*  
33 2015;28:322–7.doi:10.1016/j.apnr.2015.03.008  
34  
35  
36  
37 21. Wister A, Kendig H, Mitchell B, et al. Multimorbidity, health and aging in Canada  
38 and Australia: a tale of two countries. *BMC Geriatr*2016;1:163-176.doi:  
39 10.1186/s12877-016-0341-z  
40  
41  
42  
43 22. Afshar S, Roderick PJ, Kowal P, et al. Multimorbidity and the inequalities of global  
44 ageing: a cross-sectional study of 28 countries using the World Health Surveys.  
45 *BMC Public Health*2015;15:776-786.doi:10.1186/s12889-015-2008-7  
46  
47  
48  
49 23. Boeckxstaens P, Peersman W, Goubin G, et al. A practice-based analysis of  
50 combinations of diseases in patients aged 65 or older in primary care. *BMC Family*  
51 *Practice* 2014;1:1-6.doi: 10.1186/1471-2296-15-159.  
52  
53  
54 24. Britt HC , Harrison CM , Miller GC , et al . Prevalence and patterns of  
55 multimorbidity in Australia. *Med J Aust* 2008;2: 72-77  
56  
57  
58 25. Glynn LG , Valderas JM , Healy P , et al . The prevalence of multimorbidity in  
59  
60

- 1  
2  
3 primary care and its effect on health care utilization and cost. *Fam Pract*  
4 2011;28:516–23.doi:10.1093/fampra/cmr013  
5  
6  
7 26. Marengoni A , Angleman S , Melis R , et al . Aging with multimorbidity: a  
8 systematic review of the literature. *Ageing Res Rev* 2011;10:430–  
9 9.doi:10.1016/j.arr.2011.03.003  
10  
11  
12 27. Barnett K , Mercer SW , Norbury M , et al . Epidemiology of multimorbidity and  
13 implications for health care, research, and medical education: a cross-sectional  
14 study. *Lancet* 2012;380:37–43.doi:10.1016/S0140-6736(12)60240-2  
15  
16  
17 28. Fortin M , Stewart M , Poitras ME , et al . A systematic review of prevalence studies  
18 on multimorbidity: toward a more uniform methodology. *Ann Fam Med*  
19 2012;10:142–51.doi:10.1370/afm.1337.  
20  
21  
22 29. García-Gómez M C, De L E, Ordoñez-Palau S, et al. High Prevalence of Gallstone  
23 Disease in Rheumatoid Arthritis: A New Comorbidity Related to Dyslipidemia? [J].  
24 *Reumatol Clin*, 2017;14:294-300. doi: 10.1016/j.reuma.2018.03.012.  
25  
26  
27 30. Barbour KE, Helmick CG, Boring M, et al. Vital Signs: Prevalence of Doctor-  
28 Diagnosed Arthritis and Arthritis-Attributable Activity Limitation — United States,  
29 2013–2015. *MMWR Morb Mortal Wkly Rep*, 2017;66:246–253. doi:  
30 http://dx.doi.org/10.15585/mmwr.mm6609e1.  
31  
32  
33 31. Ward BW, Schiller JS. Prevalence of multiple chronic conditions among US adults:  
34 estimates from the National Health Interview Survey, 2010. *Prev Chronic Dis*  
35 2013;10:120203. doi: 10.5888/pcd10.120203  
36  
37  
38 32. Bao W, Hu D, Shi X, et al. Comorbidity increased the risk of falls in Chinese older  
39 adults: A cross-sectional study. *Int J Clin Exp Med*,2017;7:10753-10763.  
40  
41  
42 33. Gao N, Yuan Z, Tang X, et al. Prevalence of CHD-related metabolic comorbidity  
43 of diabetes mellitus in Northern Chinese adults: the REACTION study. *J Diabetes*  
44 *Complications*2016;2:199-205.doi:10.1016/j.jdiacomp.2015.11.018  
45  
46  
47  
48  
49  
50  
51  
52  
53  
54  
55  
56  
57  
58  
59  
60

## Figure legends

**Figure 1** Flowchart for selecting the study sample from the original sample population. CHARLS, China Health and Retirement Longitudinal Survey

**Figure 2** Frequency and percentage of people aged over 60 suffering from different diseases based on CHARLS data

**Figure 3** Prevalence Rates of chronic condition in elderly people over 60 years old based on CHARLS data





Figure 1 Flowchart for selecting the study sample from the original sample population. CHARLS, China Health and Retirement Longitudinal Survey

171x93mm (300 x 300 DPI)



Figure 2 Frequency and percentage of people aged over 60 suffering from different diseases based on CHARLS data

222x119mm (300 x 300 DPI)



Figure 3 Prevalence Rates of chronic condition in elderly people over 60 years old based on CHARLS data

151x140mm (300 x 300 DPI)

**Annex 1 Sensitivity analysis, Comparison of the characteristics of complete cases and incomplete cases**

|                               | <b>Complete cases</b> | <b>Incomplete cases</b> | <b>P*</b> |
|-------------------------------|-----------------------|-------------------------|-----------|
| Number of people              | 11707                 | 876                     |           |
| Proportion (%)                | 93.04%                | 6.96%                   |           |
| Mean age All respondents (SD) | 70.20(7.907)          | 69.60 (7.824)           | <0.001    |
| <b>Male</b> (SD)              | 69.97(7.575)          | 69.58 (7.721)           | <0.001    |
| <b>Female</b> (SD)            | 70.39(8.189)          | 69.62 (7.973)           | <0.001    |
| Gender (% females)            | 51.28%                | 49.27%                  | 0.193     |

p\* = statistical significance of the difference between the complete cases and the incomplete cases (t-tests were performed for comparison of means, and chi-square-tests for differences between percentages)

**Annex 2 O/E ratio of all binary and triads comorbidities pattern present in participants**

| Rank | binary comorbidities pattern                                           | O/E ratio |
|------|------------------------------------------------------------------------|-----------|
| 1    | Chronic lung diseases and Asthma                                       | 161.00    |
| 2    | Emotional, nervous, or psychiatric problems and Memory-related disease | 98.57     |
| 3    | Dyslipidemia and Diabetes or high blood sugar                          | 38.69     |
| 4    | Heart disease and Memory-related disease                               | 25.96     |
| 5    | Stroke and Memory-related disease                                      | 24.19     |
| 6    | Hypertension and Stroke                                                | 23.10     |
| 7    | Hypertension and Diabetes or high blood sugar                          | 20.77     |
| 8    | Cancer or malignant tumor and Stroke                                   | 19.71     |
| 9    | Memory-related disease and Asthma                                      | 19.71     |
| 10   | Stroke and Asthma                                                      | 19.71     |
| 11   | Hypertension and Heart disease                                         | 19.07     |
| 12   | Hypertension and Dyslipidemia                                          | 18.98     |
| 13   | Dyslipidemia and Heart disease                                         | 17.39     |
| 14   | Diabetes or high blood sugar and Heart disease                         | 14.87     |
| 15   | Diabetes or high blood sugar and Liver disease                         | 14.40     |
| 16   | Cancer or malignant tumor and Liver disease                            | 13.65     |
| 17   | Diabetes or high blood sugar and Kidney disease                        | 13.38     |
| 18   | Hypertension and Memory-related disease                                | 13.33     |
| 19   | Dyslipidemia and Cancer or malignant tumor                             | 12.51     |
| 20   | Stomach or other digestive disease and Arthritis or rheumatism         | 10.80     |
| 21   | Liver disease and Heart disease                                        | 10.49     |
| 22   | Dyslipidemia and Stroke                                                | 10.23     |
| 23   | Dyslipidemia and Stomach or other digestive disease                    | 9.81      |
| 24   | Dyslipidemia and Kidney disease                                        | 9.61      |
| 25   | Chronic lung diseases and Memory-related disease                       | 9.56      |
| 26   | Chronic lung diseases and Stroke                                       | 9.56      |
| 27   | Kidney disease and Arthritis or rheumatism                             | 9.42      |
| 28   | Heart disease and Kidney disease                                       | 9.29      |
| 29   | Chronic lung diseases and Heart disease                                | 9.12      |
| 30   | Stomach or other digestive disease and Asthma                          | 9.03      |
| 31   | Liver disease and Kidney disease                                       | 8.99      |
| 32   | Kidney disease and Stomach or other digestive disease                  | 8.92      |
| 33   | Memory-related disease and Arthritis or rheumatism                     | 8.89      |
| 34   | Stroke and Arthritis or rheumatism                                     | 8.89      |
| 35   | Arthritis or rheumatism and Asthma                                     | 8.77      |
| 36   | Liver disease and Memory-related disease                               | 8.38      |
| 37   | Diabetes or high blood sugar and Memory-related disease                | 8.32      |
| 38   | Diabetes or high blood sugar and Stroke                                | 8.32      |
| 39   | Chronic lung diseases and Arthritis or rheumatism                      | 8.14      |
| 40   | Heart disease and Stomach or other digestive disease                   | 8.11      |

|    |    |                                                                         |      |
|----|----|-------------------------------------------------------------------------|------|
| 1  |    |                                                                         |      |
| 2  |    |                                                                         |      |
| 3  | 41 | Heart disease and Arthritis or rheumatism                               | 7.45 |
| 4  |    |                                                                         |      |
| 5  | 42 | Stomach or other digestive disease and Emotional, nervous, or           | 7.39 |
| 6  |    | psychiatric problems                                                    |      |
| 7  | 43 | Liver disease and Stomach or other digestive disease                    | 7.33 |
| 8  | 44 | Diabetes or high blood sugar and Cancer or malignant tumor              | 6.78 |
| 9  | 45 | Diabetes or high blood sugar and Asthma                                 | 6.78 |
| 10 | 46 | Diabetes or high blood sugar and Arthritis or rheumatism                | 6.44 |
| 11 | 47 | Liver disease and Arthritis or rheumatism                               | 6.16 |
| 12 | 48 | Chronic lung diseases and Kidney disease                                | 5.98 |
| 13 | 49 | Chronic lung diseases and Stomach or other digestive disease            | 5.97 |
| 14 | 50 | Hypertension and Arthritis or rheumatism                                | 5.74 |
| 15 | 51 | Chronic lung diseases and Liver disease                                 | 5.52 |
| 16 | 52 | Kidney disease and Emotional, nervous, or psychiatric problems          | 5.29 |
| 17 | 53 | Kidney disease and Asthma                                               | 5.29 |
| 18 | 54 | Chronic lung diseases and Emotional, nervous, or psychiatric problems   | 5.19 |
| 19 | 55 | Dyslipidemia and Memory-related disease                                 | 5.12 |
| 20 | 56 | Hypertension and Emotional, nervous, or psychiatric problems            | 5.07 |
| 21 | 57 | Hypertension and Chronic lung diseases                                  | 5.03 |
| 22 | 58 | Hypertension and Kidney disease                                         | 5.01 |
| 23 | 59 | Cancer or malignant tumor and Arthritis or rheumatism                   | 4.96 |
| 24 | 60 | Cancer or malignant tumor and Stomach or other digestive disease        | 4.93 |
| 25 | 61 | Dyslipidemia and Arthritis or rheumatism                                | 4.75 |
| 26 | 62 | Hypertension and Liver disease                                          | 4.61 |
| 27 | 63 | Diabetes or high blood sugar and Chronic lung diseases                  | 4.38 |
| 28 | 64 | Heart disease and Stroke                                                | 4.33 |
| 29 | 65 | Dyslipidemia and Asthma                                                 | 4.17 |
| 30 | 66 | Hypertension and Stomach or other digestive disease                     | 3.85 |
| 31 | 67 | Cancer or malignant tumor and Heart disease                             | 3.53 |
| 32 | 68 | Heart disease and Asthma                                                | 3.53 |
| 33 | 69 | Emotional, nervous, or psychiatric problems and Arthritis or rheumatism | 3.43 |
| 34 | 70 | Diabetes or high blood sugar and Stomach or other digestive disease     | 3.12 |
| 35 | 71 | Hypertension and Cancer or malignant tumor                              | 2.17 |
| 36 | 72 | Hypertension and Asthma                                                 | 2.17 |
| 37 | 73 | Stomach or other digestive disease and Memory-related disease           | 2.02 |
| 38 | 74 | Stroke and Stomach or other digestive disease                           | 2.02 |
| 39 | 75 | Dyslipidemia and Liver disease                                          | 1.77 |
| 40 | 76 | Dyslipidemia and Chronic lung diseases                                  | 1.35 |
| 41 |    |                                                                         |      |
| 42 |    |                                                                         |      |
| 43 |    |                                                                         |      |
| 44 |    |                                                                         |      |
| 45 |    |                                                                         |      |
| 46 |    |                                                                         |      |
| 47 |    |                                                                         |      |
| 48 |    |                                                                         |      |
| 49 |    |                                                                         |      |
| 50 |    |                                                                         |      |
| 51 |    |                                                                         |      |
| 52 |    |                                                                         |      |
| 53 |    |                                                                         |      |
| 54 |    |                                                                         |      |
| 55 |    |                                                                         |      |
| 56 |    |                                                                         |      |
| 57 |    |                                                                         |      |
| 58 |    |                                                                         |      |
| 59 |    |                                                                         |      |
| 60 |    |                                                                         |      |

| Rank | triads comorbidities pattern                                                               | O/E ratio |
|------|--------------------------------------------------------------------------------------------|-----------|
| 1    | Stroke, Emotional, nervous, or psychiatric problems and Memory-related disease             | 10491.60  |
| 2    | Emotional, nervous, or psychiatric problems, Memory-related disease, Asthma,               | 8548.88   |
| 3    | Heart disease, Stroke and Memory-related disease                                           | 2302.62   |
| 4    | Chronic lung diseases, Emotional, nervous, or psychiatric problems and Asthma              | 2252.13   |
| 5    | Chronic lung diseases, Heart disease, Asthma,                                              | 1977.13   |
| 6    | Dyslipidemia, Heart disease and Memory-related disease                                     | 1461.04   |
| 7    | Hypertension, Stroke and Memory-related disease                                            | 1418.54   |
| 8    | Hypertension, Dyslipidemia and Diabetes or high blood sugar                                | 1409.29   |
| 9    | Chronic lung diseases, Memory-related disease and Asthma                                   | 1381.96   |
| 10   | Chronic lung diseases, Arthritis or rheumatism and Asthma                                  | 1256.63   |
| 11   | Dyslipidemia, Diabetes or high blood sugar and Kidney disease                              | 1255.51   |
| 12   | Cancer or malignant tumor, Chronic lung diseases and Asthma                                | 1126.07   |
| 13   | Chronic lung diseases, Kidney disease and Asthma                                           | 1112.24   |
| 14   | Liver disease, Kidney disease and Asthma                                                   | 974.52    |
| 15   | Dyslipidemia, Diabetes or high blood sugar and Liver disease                               | 972.21    |
| 16   | Chronic lung diseases, Liver disease and Asthma                                            | 956.96    |
| 17   | Dyslipidemia, Diabetes or high blood sugar and Stroke                                      | 935.99    |
| 18   | Chronic lung diseases, Stomach or other digestive disease and Asthma                       | 921.21    |
| 19   | Hypertension, Dyslipidemia and Heart disease                                               | 876.36    |
| 20   | Diabetes or high blood sugar, Liver disease and Kidney disease                             | 822.11    |
| 21   | Hypertension, Diabetes or high blood sugar and Stroke                                      | 812.58    |
| 22   | Hypertension, Chronic lung diseases and Asthma                                             | 812.01    |
| 23   | Hypertension, Dyslipidemia and Stroke                                                      | 800.07    |
| 24   | Dyslipidemia, Heart disease and Asthma                                                     | 793.67    |
| 25   | Diabetes or high blood sugar, Heart disease and Stroke                                     | 791.41    |
| 26   | Hypertension, Emotional, nervous, or psychiatric problems and Memory-related disease       | 770.58    |
| 27   | Dyslipidemia, Diabetes or high blood sugar and Cancer or malignant tumor                   | 762.67    |
| 28   | Dyslipidemia, Diabetes or high blood sugar and Emotional, nervous, or psychiatric problems | 762.67    |
| 29   | Dyslipidemia, Diabetes or high blood sugar and Heart disease                               | 669.54    |
| 30   | Liver disease, Heart disease and Emotional, nervous, or psychiatric problems               | 649.62    |
| 31   | Heart disease, Kidney disease and Memory-related disease                                   | 617.74    |
| 32   | Heart disease, Stroke and Kidney disease                                                   | 617.74    |
| 33   | Dyslipidemia, Chronic lung diseases and Asthma                                             | 584.58    |
| 34   | Diabetes or high blood sugar, Liver disease and Heart disease                              | 548.02    |

|    |                                                                                                            |        |
|----|------------------------------------------------------------------------------------------------------------|--------|
| 35 | Hypertension, Diabetes or high blood sugar and Heart disease                                               | 523.14 |
| 36 | Hypertension, Heart disease and Stroke                                                                     | 507.36 |
| 37 | Diabetes or high blood sugar, Chronic lung diseases and Asthma                                             | 474.98 |
| 38 | Liver disease, Stomach or other digestive disease and Asthma                                               | 454.02 |
| 39 | Stomach or other digestive disease, Emotional, nervous, or psychiatric problems and Memory-related disease | 437.10 |
| 40 | Hypertension, Memory-related disease, Asthma,                                                              | 385.29 |
| 41 | Diabetes or high blood sugar, Stomach or other digestive disease and Asthma                                | 300.46 |
| 42 | Hypertension, Dyslipidemia and Memory-related disease                                                      | 300.03 |
| 43 | Liver disease, Kidney disease and Arthritis or rheumatism                                                  | 277.66 |
| 44 | Hypertension, Heart disease and Memory-related disease                                                     | 253.68 |
| 45 | Dyslipidemia, Liver disease and Kidney disease                                                             | 252.95 |
| 46 | Hypertension, Chronic lung diseases and Stroke                                                             | 249.13 |
| 47 | Stroke, Memory-related disease and Arthritis or rheumatism                                                 | 249.11 |
| 48 | Dyslipidemia, Chronic lung diseases and Liver disease                                                      | 248.40 |
| 49 | Cancer or malignant tumor, Chronic lung diseases and Heart disease                                         | 247.14 |
| 50 | Chronic lung diseases, Heart disease and Emotional, nervous, or psychiatric problems                       | 247.14 |
| 51 | Hypertension, Dyslipidemia and Asthma                                                                      | 244.47 |
| 52 | Cancer or malignant tumor, Heart disease and Stomach or other digestive disease                            | 234.50 |
| 53 | Chronic lung diseases, Memory-related disease and Arthritis or rheumatism                                  | 229.69 |
| 54 | Chronic lung diseases, Stroke and Stomach or other digestive disease                                       | 211.98 |
| 55 | Hypertension, Stroke and Arthritis or rheumatism                                                           | 210.41 |
| 56 | Chronic lung diseases, Liver disease and Heart disease                                                     | 210.03 |
| 57 | Hypertension, Cancer or malignant tumor and Heart disease                                                  | 206.71 |
| 58 | Hypertension, Heart disease and Emotional, nervous, or psychiatric problems                                | 206.71 |
| 59 | Memory-related disease, Arthritis or rheumatism and Asthma                                                 | 202.98 |
| 60 | Emotional, nervous, or psychiatric problems, Memory-related disease and Arthritis or rheumatism            | 202.98 |
| 61 | Stroke, Emotional, nervous, or psychiatric problems and Arthritis or rheumatism                            | 202.98 |
| 62 | Stroke, Kidney disease and Arthritis or rheumatism                                                         | 200.49 |
| 63 | Dyslipidemia, Diabetes or high blood sugar and Stomach or other digestive disease                          | 194.98 |
| 64 | Liver disease, Stomach or other digestive disease and Memory-related disease                               | 185.73 |
| 65 | Dyslipidemia, Stomach or other digestive disease and Asthma                                                | 184.90 |
| 66 | Diabetes or high blood sugar, Stomach or other digestive disease and Memory-related disease                | 184.37 |
| 67 | Diabetes or high blood sugar, Heart disease and Arthritis or rheumatism                                    | 183.74 |



1  
2  
3  
4  
5  
6  
7  
8  
9  
10  
11  
12  
13  
14  
15  
16  
17  
18  
19  
20  
21  
22  
23  
24  
25  
26  
27  
28  
29  
30  
31  
32  
33  
34  
35  
36  
37  
38  
39  
40  
41  
42  
43  
44  
45  
46  
47  
48  
49  
50  
51  
52  
53  
54  
55  
56  
57  
58  
59  
60

---

|     |                                                                                                   |        |
|-----|---------------------------------------------------------------------------------------------------|--------|
| 68  | Chronic lung diseases, Stroke and Arthritis or rheumatism                                         | 164.06 |
| 69  | Kidney disease, Arthritis or rheumatism and Asthma                                                | 163.36 |
| 70  | Dyslipidemia, Diabetes or high blood sugar and Arthritis or rheumatism                            | 162.98 |
| 71  | Hypertension, Diabetes or high blood sugar and Memory-related disease                             | 162.52 |
| 72  | Hypertension, Dyslipidemia and Kidney disease                                                     | 160.98 |
| 73  | Hypertension, Heart disease and Kidney disease                                                    | 158.80 |
| 74  | Chronic lung diseases, Liver disease and Kidney disease                                           | 157.53 |
| 75  | Dyslipidemia, Liver disease and Stomach or other digestive disease                                | 157.13 |
| 76  | Heart disease, Kidney disease and Stomach or other digestive disease                              | 154.42 |
| 77  | Cancer or malignant tumor, Liver disease and Stomach or other digestive disease                   | 151.34 |
| 78  | Liver disease, Stomach or other digestive disease and Emotional, nervous, or psychiatric problems | 151.34 |
| 79  | Heart disease, Arthritis or rheumatism and Asthma                                                 | 145.20 |
| 80  | Stroke, Kidney disease and Stomach or other digestive disease                                     | 143.91 |
| 81  | Liver disease, Emotional, nervous, or psychiatric problems and Arthritis or rheumatism            | 140.56 |
| 82  | Diabetes or high blood sugar, Arthritis or rheumatism and Asthma                                  | 139.53 |
| 83  | Hypertension, Dyslipidemia and Liver disease                                                      | 138.50 |
| 84  | Hypertension, Heart disease and Asthma                                                            | 137.80 |
| 85  | Kidney disease, Stomach or other digestive disease and Arthritis or rheumatism                    | 136.43 |
| 86  | Chronic lung diseases, Emotional, nervous, or psychiatric problems and Arthritis or rheumatism    | 133.68 |
| 87  | Hypertension, Liver disease and Asthma                                                            | 133.40 |
| 88  | Hypertension, Diabetes or high blood sugar and Cancer or malignant tumor                          | 132.42 |
| 89  | Chronic lung diseases, Stomach or other digestive disease and Arthritis or rheumatism             | 131.24 |
| 90  | Hypertension, Diabetes or high blood sugar and Kidney disease                                     | 130.80 |
| 91  | Heart disease, Stomach or other digestive disease and Arthritis or rheumatism                     | 128.06 |
| 92  | Dyslipidemia, Heart disease and Stomach or other digestive disease                                | 121.74 |
| 93  | Hypertension, Heart disease and Arthritis or rheumatism                                           | 121.06 |
| 94  | Stomach or other digestive disease, Arthritis or rheumatism and Asthma                            | 118.39 |
| 95  | Chronic lung diseases, Heart disease and Arthritis or rheumatism                                  | 117.36 |
| 96  | Hypertension, Liver disease and Heart disease                                                     | 117.11 |
| 97  | Diabetes or high blood sugar, Kidney disease and Arthritis or rheumatism                          | 114.85 |
| 98  | Chronic lung diseases, Heart disease and Stomach or other digestive disease                       | 113.73 |
| 99  | Hypertension, Diabetes or high blood sugar and Liver disease                                      | 112.54 |
| 100 | Diabetes or high blood sugar, Chronic lung diseases and Heart disease                             | 104.24 |
| 101 | Liver disease, Stomach or other digestive disease and Arthritis or rheumatism                     | 104.21 |
| 102 | Stroke, Stomach or other digestive disease and Arthritis or rheumatism                            | 103.78 |

---

|     |                                                                                                  |        |
|-----|--------------------------------------------------------------------------------------------------|--------|
| 103 | Hypertension, Kidney disease and Emotional, nervous, or psychiatric problems                     | 103.36 |
| 104 | Chronic lung diseases, Liver disease and Arthritis or rheumatism                                 | 102.25 |
| 105 | Hypertension, Dyslipidemia and Arthritis or rheumatism                                           | 100.61 |
| 106 | Liver disease, Kidney disease and Stomach or other digestive disease                             | 99.65  |
| 107 | Dyslipidemia, Cancer or malignant tumor and Stomach or other digestive disease                   | 92.45  |
| 108 | Dyslipidemia, Stomach or other digestive disease and Emotional, nervous, or psychiatric problems | 92.45  |
| 109 | Hypertension, Dyslipidemia and Chronic lung diseases                                             | 92.21  |
| 110 | Hypertension, Chronic lung diseases and Heart disease                                            | 89.11  |
| 111 | Heart disease, Stroke and Arthritis or rheumatism                                                | 89.10  |
| 112 | Hypertension, Heart disease and Stomach or other digestive disease                               | 88.07  |
| 113 | Chronic lung diseases, Heart disease and Kidney disease                                          | 81.37  |
| 114 | Chronic lung diseases, Kidney disease and Arthritis or rheumatism                                | 79.23  |
| 115 | Diabetes or high blood sugar, Chronic lung diseases and Arthritis or rheumatism                  | 78.94  |
| 116 | Chronic lung diseases, Kidney disease and Stomach or other digestive disease                     | 75.82  |
| 117 | Hypertension, Diabetes or high blood sugar and Arthritis or rheumatism                           | 75.46  |
| 118 | Hypertension, Dyslipidemia and Stomach or other digestive disease                                | 75.00  |
| 119 | Chronic lung diseases, Liver disease and Stomach or other digestive disease                      | 73.39  |
| 120 | Hypertension, Memory-related disease and Arthritis or rheumatism                                 | 73.19  |
| 121 | Stomach or other digestive disease, Memory-related disease and Arthritis or rheumatism           | 72.65  |
| 122 | Heart disease, Kidney disease and Arthritis or rheumatism                                        | 71.71  |
| 123 | Liver disease, Arthritis or rheumatism and Asthma                                                | 70.28  |
| 124 | Diabetes or high blood sugar, Cancer or malignant tumor and Arthritis or rheumatism              | 69.76  |
| 125 | Kidney disease, Memory-related disease and Arthritis or rheumatism                               | 66.83  |
| 126 | Dyslipidemia, Heart disease and Arthritis or rheumatism                                          | 65.96  |
| 127 | Diabetes or high blood sugar, Heart disease and Stomach or other digestive disease               | 65.94  |
| 128 | Dyslipidemia, Chronic lung diseases and Heart disease                                            | 64.15  |
| 129 | Hypertension, Kidney disease and Arthritis or rheumatism                                         | 63.81  |
| 130 | Dyslipidemia, Stomach or other digestive disease and Arthritis or rheumatism                     | 63.66  |
| 131 | Hypertension, Chronic lung diseases and Memory-related disease                                   | 62.28  |
| 132 | Dyslipidemia, Kidney disease and Stomach or other digestive disease                              | 60.88  |
| 133 | Hypertension, Stroke and Stomach or other digestive disease                                      | 59.10  |
| 134 | Cancer or malignant tumor, Chronic lung diseases and Stomach or other digestive disease          | 57.58  |

|    |     |                                                                             |
|----|-----|-----------------------------------------------------------------------------|
| 1  |     |                                                                             |
| 2  |     |                                                                             |
| 3  |     |                                                                             |
| 4  | 135 | Cancer or malignant tumor, Chronic lung diseases and Arthritis or           |
| 5  |     | rheumatism                                                                  |
| 6  |     | 53.47                                                                       |
| 7  | 136 | Hypertension, Stomach or other digestive disease and Arthritis or           |
| 8  |     | rheumatism                                                                  |
| 9  |     | 52.98                                                                       |
| 10 | 137 | Dyslipidemia, Memory-related disease and Arthritis or rheumatism            |
| 11 |     | 52.69                                                                       |
| 12 | 138 | Dyslipidemia, Stroke and Arthritis or rheumatism                            |
| 13 |     | 52.69                                                                       |
| 14 | 139 | Hypertension, Cancer or malignant tumor and Chronic lung diseases           |
| 15 |     | 50.75                                                                       |
| 16 | 140 | Hypertension, Chronic lung diseases and Kidney disease                      |
| 17 |     | 50.13                                                                       |
| 18 | 141 | Liver disease, Heart disease and Arthritis or rheumatism                    |
| 19 |     | 46.27                                                                       |
| 20 | 142 | Hypertension, Cancer or malignant tumor and Arthritis or rheumatism         |
| 21 |     | 44.73                                                                       |
| 22 | 143 | Hypertension, Liver disease and Kidney disease                              |
| 23 |     | 43.92                                                                       |
| 24 | 144 | Hypertension, Chronic lung diseases and Liver disease                       |
| 25 |     | 43.13                                                                       |
| 26 | 145 | Dyslipidemia, Cancer or malignant tumor and Arthritis or rheumatism         |
| 27 |     | 42.93                                                                       |
| 28 | 146 | Dyslipidemia, Arthritis or rheumatism and Asthma                            |
| 29 |     | 42.93                                                                       |
| 30 | 147 | Hypertension, Diabetes or high blood sugar and Chronic lung diseases        |
| 31 |     | 42.81                                                                       |
| 32 | 148 | Dyslipidemia, Kidney disease and Arthritis or rheumatism                    |
| 33 |     | 42.40                                                                       |
| 34 | 149 | Stomach or other digestive disease, Emotional, nervous, or psychiatric      |
| 35 |     | problems and Arthritis or rheumatism                                        |
| 36 |     | 42.28                                                                       |
| 37 | 150 | Hypertension, Liver disease and Arthritis or rheumatism                     |
| 38 |     | 41.18                                                                       |
| 39 | 151 | Hypertension, Stomach or other digestive disease and Memory-related         |
| 40 |     | disease                                                                     |
| 41 |     | 39.40                                                                       |
| 42 | 152 | Diabetes or high blood sugar, Stomach or other digestive disease and        |
| 43 |     | Arthritis or rheumatism                                                     |
| 44 |     | 39.24                                                                       |
| 45 | 153 | Hypertension, Arthritis or rheumatism and Asthma                            |
| 46 |     | 37.27                                                                       |
| 47 | 154 | Dyslipidemia, Liver disease and Arthritis or rheumatism                     |
| 48 |     | 36.48                                                                       |
| 49 | 155 | Heart disease, Emotional, nervous, or psychiatric problems and Arthritis or |
| 50 |     | rheumatism                                                                  |
| 51 |     | 36.30                                                                       |
| 52 | 156 | Hypertension, Chronic lung diseases and Arthritis or rheumatism             |
| 53 |     | 34.95                                                                       |
| 54 | 157 | Dyslipidemia, Chronic lung diseases and Arthritis or rheumatism             |
| 55 |     | 34.70                                                                       |
| 56 | 158 | Hypertension, Diabetes or high blood sugar and Stomach or other digestive   |
| 57 |     | disease                                                                     |
| 58 |     | 33.85                                                                       |
| 59 | 159 | Cancer or malignant tumor, Stomach or other digestive disease and           |
| 60 |     | Arthritis or rheumatism                                                     |
|    |     | 33.83                                                                       |
|    | 160 | Liver disease, Heart disease and Stomach or other digestive disease         |
|    |     | 33.21                                                                       |
|    | 161 | Dyslipidemia, Chronic lung diseases and Stomach or other digestive          |
|    |     | disease                                                                     |
|    |     | 29.89                                                                       |
|    | 162 | Diabetes or high blood sugar, Liver disease and Arthritis or rheumatism     |
|    |     | 29.64                                                                       |
|    | 163 | Hypertension, Kidney disease and Stomach or other digestive disease         |
|    |     | 26.42                                                                       |
|    | 164 | Diabetes or high blood sugar, Chronic lung diseases and Stomach or other    |
|    |     | digestive disease                                                           |
|    |     | 24.29                                                                       |
|    | 165 | Hypertension, Emotional, nervous, or psychiatric problems and Arthritis or  |
|    |     | rheumatism                                                                  |
|    |     | 22.36                                                                       |
|    | 166 | Hypertension, Liver disease and Stomach or other digestive disease          |
|    |     | 20.46                                                                       |

---

|     |                                                                                                  |       |
|-----|--------------------------------------------------------------------------------------------------|-------|
| 167 | Hypertension, Cancer or malignant tumor and Stomach or other digestive disease                   | 16.05 |
| 168 | Hypertension, Stomach or other digestive disease and Emotional, nervous, or psychiatric problems | 16.05 |
| 169 | Hypertension, Chronic lung diseases and Stomach or other digestive disease                       | 15.57 |

---

For peer review only

# BMJ Open

## Prevalence and patterns of multimorbidity among the elderly in China: a cross-sectional study using national survey data

|                                 |                                                                                                                                                                                                                                                                                                                                                                                                                                                                                                 |
|---------------------------------|-------------------------------------------------------------------------------------------------------------------------------------------------------------------------------------------------------------------------------------------------------------------------------------------------------------------------------------------------------------------------------------------------------------------------------------------------------------------------------------------------|
| Journal:                        | <i>BMJ Open</i>                                                                                                                                                                                                                                                                                                                                                                                                                                                                                 |
| Manuscript ID                   | bmjopen-2018-024268.R4                                                                                                                                                                                                                                                                                                                                                                                                                                                                          |
| Article Type:                   | Research                                                                                                                                                                                                                                                                                                                                                                                                                                                                                        |
| Date Submitted by the Author:   | 30-May-2019                                                                                                                                                                                                                                                                                                                                                                                                                                                                                     |
| Complete List of Authors:       | zhang, ran; China Pharmaceutical University, School of International Pharmaceutical Business<br>Lu, Yun; China Pharmaceutical University, School of International Pharmaceutical Business<br>Shi, Liuyan; China Pharmaceutical University, School of International Pharmaceutical Business<br>Zhang, SongLin; China Pharmaceutical University, School of International Pharmaceutical Business<br>Chang, Feng; China Pharmaceutical University, School of International Pharmaceutical Business |
| <b>Primary Subject Heading</b>: | Health informatics                                                                                                                                                                                                                                                                                                                                                                                                                                                                              |
| Secondary Subject Heading:      | Public health, Qualitative research                                                                                                                                                                                                                                                                                                                                                                                                                                                             |
| Keywords:                       | multimorbidity, cross-sectional study, Prevalence, Observed-to-expected ratio, China                                                                                                                                                                                                                                                                                                                                                                                                            |
|                                 |                                                                                                                                                                                                                                                                                                                                                                                                                                                                                                 |

SCHOLARONE™  
Manuscripts

1  
2  
3  
4 **Prevalence and patterns of multimorbidity among the elderly**  
5  
6 **in China: a cross-sectional study using national survey data**  
7  
8

9 **Author**

10 **NAME: Ran Zhang**

11 **Postal address: 639 Longmian Road, Nanjing, Jiangsu Province, CHINA**

12 **E-mail: ranzai7@126.com**

13 **Institutions: China Pharmaceutical University**

14 **City & Country: Jiangsu Province, CHINA**

15 **Telephone: +86-18115161231**

16 **Co-Authors**

17 **NAME: Yun Lu, Liuyan Shi, Songlin Zhang**

18 **Institutions: China Pharmaceutical University**

19 **City & Country: Jiangsu Province, CHINA**

20 **Corresponding Author**

21 **NAME: Feng Chang**

22 **Postal address: 639 Longmian Road, Nanjing, Jiangsu Province, CHINA**

23 **E-mail: cpucf@163.com**

24 **Institutions: China Pharmaceutical University**

25 **City & Country: Jiangsu Province, CHINA**

26 **Telephone: +86-13805153128**

27 **Keywords:**

28 **multimorbidity, Cross-sectional study, Prevalence, Observed-to-expected ratio,**

29 **China**

30 **Word count: 4911**

## ABSTRACT

**Objectives:** Examination of the prevalence and patterns of multimorbidity among the elderly in China.

**Design:** Cross-sectional study.

**Setting:** More than 10,000 households in 28 of the 34 provinces of mainland China.

**Participants:** 11,707 Chinese adults aged 60 and over.

**Primary outcome measures:** Prevalence and patterns of multimorbidity among the participants. Relative risks were calculated to estimate the probability of up to 14 chronic conditions coexisting with each other. Observed-to-expected (O/E) ratios were used to analyze the patterns of multimorbidity.

**Results:** Multimorbidity was present in 43.6% of respondents from the sample population, with women having the greater prevalence compared to men. There were 804 different comorbidity combinations identified, including 76 dyad combinations and 169 triad combinations. The top 10 morbidity dyads and triads accounted for 69.01% and 47.05% of the total dyad and triad combinations observed, respectively. Among the 14 chronic conditions included in the study, asthma, stroke, heart attack and six other chronic conditions were the main components of multimorbidity due to their high relative risk ratios. The most frequently occurring clusters with higher O/E ratios were stroke along with emotional, nervous, or psychiatric problems; memory-related diseases together emotional, nervous, or psychiatric problems; and memory-related diseases and asthma accompanied by chronic lung diseases and asthma.

**Conclusions:** The results of this study highlight the high prevalence of multimorbidity in the elderly population in China. Further studies are required to understand the etiology of multimorbidity, and future primary healthcare policies should be made while taking multimorbidity into consideration.

## Strengths and limitations of this study

### Strengths

- This is the first study to estimate the prevalence and patterns of multimorbidity among the elderly population in China.
- Data for this study were collected from a nationally representative longitudinal survey of 17,708 Chinese residents.

### Limitations

- Only 14 predefined chronic diseases were included in the study, and these may not be comprehensive of the conditions of the population.
- The data analyzed from the CHARLS were originally collected by population self-reporting, not clinician evaluation, and could partially reflect some associated biases or confounds.
- This study only included older patients aged 60 years and above with complete data. Although exclusion of incomplete data may cause a selection bias, significant differences between included and excluded cases were not observed.



## INTRODUCTION

Multimorbidity, or the simultaneous occurrence of two or more chronic conditions in an individual, is becoming increasingly common, and this has been reported to increase progressively with age. [1, 2] At present, with China's aging population having an increasing prevalence of chronic conditions, multimorbidity among the elderly poses an enormous societal cost due to increased mortality rates and healthcare utilization. [3] However, to date, research on chronic conditions in China has focused on single disease states, and the coexistence of multiple chronic conditions has not been investigated systematically and thoroughly.

There is a significant difference in the etiological analysis between patients with single chronic conditions and those with multimorbidity. [4] The coexistence of chronic conditions in a patient is more than a random event, it is more typically due to the causal relationship between some diseases and shared pathogenic factors. [5, 6] Moreover, the interactions between diseases or between a disease and host result in differences in the severity of multimorbidity and functional status and prognosis of patients with multimorbidity. [7] Consequently, it is imperative to begin research on multimorbidity in China for the cost-effective treatments that the results may help to suggest. [8] The purpose of this study was therefore to determine the prevalence of multimorbidity among the elderly in China and to reveal morbidity combinations, which may benefit the design and implementation of a modified healthcare system with consideration for patients with multimorbidity.

## METHODS

### Data source

Data for this study were collected from the third response of the China Health and Retirement Longitudinal Survey (CHARLS), which is the most current data available. The CHARLS is a nationally representative longitudinal survey of Chinese residents aged 45 and older that was conducted by the Chinese Center for Disease Control and Prevention, along with Peking University, to help China to adjust to the rapid aging of its population through the evaluation of social, economic, and health circumstances on

1  
2  
3 the community level using data collected by interviews, physical measurements and  
4 blood sample collection. [9] The national baseline survey began in 2011 and involved  
5 17,708 respondents from 150 county-level units, 450 village-level units, and  
6 approximately 10,000 households. Afterwards, CHARLS respondents were followed  
7 every second year, with their informed consent, and the study was approved by the  
8 Peking University Biomedical Ethics Committee (IRB00001052-14013-exemption).  
9  
10  
11  
12  
13

### 14 15 **Variables**

16  
17 The core CHARLS questionnaires included sections requesting information on  
18 demographic factors, family structure and changes, health status and functioning,  
19 healthcare and insurance, work, retirement and pension, income and consumption, and  
20 assets (individual and household). Information was collected by interview by trained  
21 staff. For the current study, the eligible and included participants were determined by  
22 being aged 60 and over, and data on gender, age and health status was used from the  
23 general health status and disease history section of senior citizens in the 2015 CHARLS  
24 data. This information included the following 14 common chronic health problems:  
25 hypertension, dyslipidemia (high blood lipids or low cholesterol), diabetes or elevated  
26 blood glucose (including impaired glucose tolerance and fasting blood glucose), cancer  
27 (excluding mild skin cancers), chronic lung disease such as chronic bronchitis or  
28 emphysema, pulmonary heart disease (excluding tumors or cancer), liver disease (other  
29 than fatty liver, tumors, or cancer), heart disease (such as myocardial infarction,  
30 coronary heart disease, angina pectoris, congestive heart failure and other heart  
31 diseases), stroke, kidney disease (excluding tumors or cancer), stomach or other  
32 digestive diseases (excluding tumors or cancer), emotional and mental problems,  
33 memory-related diseases (such as Alzheimer's disease, brain atrophy, Parkinson's  
34 disease), arthritis or rheumatism, and asthma. All these data were based on self-reports.  
35 Accordingly, multimorbidity was defined as the coexistence of more than one of the 14  
36 chronic conditions, with acute or subacute forms of certain conditions being excluded  
37 in this study due to the CHARLS data collection protocol.  
38  
39  
40  
41  
42  
43  
44  
45  
46  
47  
48  
49  
50  
51  
52  
53  
54

### 55 **Statistical analysis**

56 To detect the demographic characteristics of patients with multimorbidity,  
57 respondents were divided into two groups: those with multiple chronic conditions  
58 (MCC group) and those without multiple chronic conditions (Non-MCC group).  
59  
60

1  
2  
3 Descriptive statistics were calculated and expressed as means (SD) and frequencies  
4 (percentage). We applied the T<sup>2</sup> and  $\chi^2$  tests to test the differences in age, gender and  
5 the mean number of chronic conditions across different subgroups. Respective  
6 prevalence in the MCC group and the non-MCC group were calculated separately.  
7  
8 Given the exclusion of participants with incomplete data, a sensitivity analysis was  
9 conducted to compare the characteristics of the complete cases aged 60 years and above  
10 and the counterpart in the incomplete cases, which is presented in [Annex 1](#).  
11  
12  
13  
14

15 To determine the most common combination of chronic diseases, the prevalence of  
16 morbidity and multimorbidity dyads and triads were estimated, respectively. Next, the  
17 expected number of patients with a chronic disease were calculated, and the observed-  
18 to-expected (O/E) ratios were determined by dividing the number of patients in those  
19 groups by the expected number of patients. Observed-to-expected ratios were used to  
20 estimate the conditional probability of coexistence of two or three chronic conditions.  
21 [10] As an important indicator for assessing the correlation between diseases, the O/E  
22 ratio has been used in many areas of comorbidity. [10, 11] The relative risk of  
23 comorbidity for individual chronic conditions was also calculated. Relative risk of  
24 comorbidity (RR) is the ratio of the number of people with a certain chronic condition  
25 who suffer from multimorbidity to the number of patients with the same disease who  
26 do not suffer from multimorbidity. [11, 12] In other words, a higher RR value means a  
27 higher probability that the disease coexists with other diseases. However, it should be  
28 noted that there is no direct relationship between the relative risk of comorbidity and  
29 the overall prevalence of the diseases. [13, 14]  
30  
31  
32  
33  
34  
35  
36  
37  
38  
39  
40

41 All analyses in this study were completed using Stata software V.14.0 for Windows  
42 (Stata Corp). P Values <0.05 were considered to be statistically significant.  
43  
44  
45

#### 46 **Patient and public involvement**

47 Patients and the public were not involved in the development of the research  
48 question or outcome measures of the study, nor were they involved in study design and  
49 execution. There are no plans to disseminate the research results to study participants.  
50  
51  
52  
53

## 54 **RESULTS**

### 55 **Characteristics of participants**

56 The data were gathered from the third response set of CHARLS. After exclusion  
57  
58  
59  
60

of participants with incomplete data (1,002) or aged under 60 (9,259), there were 11,707 respondents with available information on related chronic diseases that were included in this study. The selection process of study sample is shown in Figure 1. The demographic characteristics of sample respondents and statistical significance test results are presented in Table 1.

Overall, the mean age for the sample population was 70.5 (ranging from 60 to 107). The sample population consisted of 5,705 (48.7%) males and 6002 (51.2%) females, and 43.6% of them suffered from multimorbidity. The median of chronic conditions in the MCC group was 3.01, compared to 0.45 in the Non-MCC group. Samples in the MCC group were 0.66 year older than those belonged to the non-MCC group. Gender differences with regard to the age of samples between the MCC group and the non-MCC group (70.57 for MCC group and 69.51 for non-MCC group) were small but statistically significant ( $p < 0.001$ ). The prevalence of multimorbidity in the female population was higher than that for the males (54.41% vs 45.59%). Figure 2 shows the number and proportion of respondents over 60 according to morbidity numbers. It can be seen that among all the participants aged over 60, only 30.9% of them did not have the 14 chronic diseases and 43.6% suffer from multimorbidity.

**Table 1. Demographic characteristics of all respondents, the MCC group and non-MCC group**

|                                   | All respondent | MCC group    | Non-MCC group | P*     |
|-----------------------------------|----------------|--------------|---------------|--------|
| Number of people                  | 11707          | 5107         | 6600          |        |
| Proportion (%)                    | 100%           | 43.62%       | 56.38%        |        |
| Mean age                          |                |              |               |        |
| All respondents (SD)              | 70.20(7.907)   | 70.57(7.701) | 69.91(8.051)  | <0.001 |
| <b>Male</b> (SD)                  | 69.97(7.575)   | 70.50(7.348) | 69.60(7.707)  | <0.001 |
| <b>Female</b> (SD)                | 70.39(8.189)   | 70.62(7.892) | 70.19(8.359)  | <0.001 |
| Gender (% females)                | 51.28%         | 54.41%       | 48.83%        | <0.001 |
| Mean number of chronic conditions |                |              |               |        |
| All respondents (SD)              | 1.57(1.560)    | 3.01(1.259)  | 0.45(0.498)   | <0.001 |
| <b>Male</b> (SD)                  | 1.47(1.534)    | 2.98(1.265)  | 0.44(0.496)   | <0.001 |
| <b>Female</b> (SD)                | 1.65(1.581)    | 3.03(7.982)  | 0.47(0.499)   | <0.001 |

SD = standard deviation;

p\* = statistical significance of the difference between the MCC and the non-MCC sample (t-tests were performed for comparison of means, and chi-square-tests for differences between percentages)

### Prevalence of chronic conditions

The prevalence of chronic conditions in the entire sample, the MCC group and the non-MCC group are shown in Figure 3. The prevalence of all fourteen chronic conditions in the MCC group was significantly higher than that in the entire sample. For instance, the prevalence of arthritis or rheumatism, hypertension, stomach or other digestive disease, heart disease and chronic lung disease were 65.97%, 48.82%, 45.86%, 29.00% and 24.97% in the MCC group, compared to 38.49%, 26.41%, 24.52%, 12.32% and 12.32% in the entire sample, respectively.

Table 2 shows the relative risks of comorbidity determined for the 14 chronic diseases reported in this study. It can be seen that the overall relative risks for asthma, stroke, heart disease and six other conditions were all above 10, which meant these diseases were >10 times easier to coexist with other chronic conditions and result in multimorbidity. In addition, the relative risks for certain diseases were positively associated with gender. For example, men had significantly higher relative risks for asthma, but lower relative risks for diabetes or high blood sugar, compared to women.

**Table 2 Relative risks of multimorbidity for different chronic conditions according to gender**

| Chronic conditions                          | All respondents | 95% Confidence Interval |             | Female | 95% Confidence Interval |             | Male  | 95% Confidence Interval |             |  |
|---------------------------------------------|-----------------|-------------------------|-------------|--------|-------------------------|-------------|-------|-------------------------|-------------|--|
|                                             |                 | Lower Bound             | Upper Bound |        | Lower Bound             | Upper Bound |       | Lower Bound             | Upper Bound |  |
|                                             |                 |                         |             |        |                         |             |       |                         |             |  |
| <b>High relative risk of multimorbidity</b> |                 |                         |             |        |                         |             |       |                         |             |  |
| Asthma                                      | 26.18           | 17.82                   | 38.46       | 20.67  | 11.85                   | 36.06       | 32.68 | 19.18                   | 55.67       |  |
| Stroke                                      | 18.62           | 12.11                   | 28.64       | 21.57  | 10.61                   | 43.86       | 17.43 | 10.13                   | 29.99       |  |
| Heart disease                               | 15.56           | 12.99                   | 18.63       | 16.48  | 12.80                   | 21.21       | 14.26 | 11.02                   | 18.46       |  |
| Diabetes or high blood sugar                | 14.40           | 11.18                   | 18.55       | 15.68  | 10.86                   | 22.63       | 13.11 | 9.24                    | 18.62       |  |

|    |                                            |       |       |       |       |       |       |       |      |       |
|----|--------------------------------------------|-------|-------|-------|-------|-------|-------|-------|------|-------|
| 1  |                                            |       |       |       |       |       |       |       |      |       |
| 2  |                                            |       |       |       |       |       |       |       |      |       |
| 3  |                                            |       |       |       |       |       |       |       |      |       |
| 4  | Dyslipidemia                               | 14.05 | 11.54 | 17.12 | 15.13 | 11.37 | 20.14 | 12.97 | 9.86 | 17.05 |
| 5  | Memory-related disease                     | 13.69 | 8.85  | 21.16 | 34.17 | 12.63 | 92.44 | 9.28  | 5.66 | 15.21 |
| 6  |                                            |       |       |       |       |       |       |       |      |       |
| 7  | Kidney disease                             | 11.57 | 9.24  | 14.49 | 15.01 | 10.17 | 22.43 | 10.24 | 7.78 | 13.48 |
| 8  |                                            |       |       |       |       |       |       |       |      |       |
| 9  | Liver disease                              | 11.10 | 8.37  | 14.71 | 16.07 | 9.70  | 26.63 | 9.15  | 6.49 | 12.89 |
| 10 | Chronic lung diseases                      | 9.87  | 8.43  | 11.55 | 10.71 | 8.26  | 13.88 | 9.74  | 8.00 | 11.86 |
| 11 |                                            |       |       |       |       |       |       |       |      |       |
| 12 | <b>Low relative risk of multimorbidity</b> |       |       |       |       |       |       |       |      |       |
| 13 |                                            |       |       |       |       |       |       |       |      |       |
| 14 | Emotional, nervous, or                     |       |       |       |       |       |       |       |      |       |
| 15 | psychiatric problems                       | 7.42  | 4.94  | 11.15 | 6.24  | 3.78  | 10.30 | 9.36  | 4.65 | 18.85 |
| 16 |                                            |       |       |       |       |       |       |       |      |       |
| 17 | Stomach or other digesti                   |       |       |       |       |       |       |       |      |       |
| 18 | ve disease                                 | 5.73  | 5.25  | 6.25  | 6.20  | 5.48  | 7.02  | 5.23  | 4.62 | 5.91  |
| 19 |                                            |       |       |       |       |       |       |       |      |       |
| 20 | Hypertension                               | 5.38  | 4.96  | 5.84  | 4.90  | 4.40  | 5.47  | 5.92  | 5.24 | 6.69  |
| 21 |                                            |       |       |       |       |       |       |       |      |       |
| 22 | Cancer or malignant                        |       |       |       |       |       |       |       |      |       |
| 23 | tumor                                      | 4.88  | 3.20  | 7.45  | 5.33  | 3.06  | 9.29  | 3.99  | 2.07 | 7.72  |
| 24 |                                            |       |       |       |       |       |       |       |      |       |
| 25 | Arthritis or rheumatism                    | 3.83  | 3.61  | 4.05  | 3.70  | 3.43  | 3.99  | 3.91  | 3.59 | 4.26  |
| 26 |                                            |       |       |       |       |       |       |       |      |       |
| 27 |                                            |       |       |       |       |       |       |       |      |       |
| 28 |                                            |       |       |       |       |       |       |       |      |       |
| 29 |                                            |       |       |       |       |       |       |       |      |       |
| 30 |                                            |       |       |       |       |       |       |       |      |       |
| 31 |                                            |       |       |       |       |       |       |       |      |       |
| 32 |                                            |       |       |       |       |       |       |       |      |       |
| 33 |                                            |       |       |       |       |       |       |       |      |       |
| 34 |                                            |       |       |       |       |       |       |       |      |       |
| 35 |                                            |       |       |       |       |       |       |       |      |       |
| 36 |                                            |       |       |       |       |       |       |       |      |       |
| 37 |                                            |       |       |       |       |       |       |       |      |       |
| 38 |                                            |       |       |       |       |       |       |       |      |       |
| 39 |                                            |       |       |       |       |       |       |       |      |       |
| 40 |                                            |       |       |       |       |       |       |       |      |       |
| 41 |                                            |       |       |       |       |       |       |       |      |       |
| 42 |                                            |       |       |       |       |       |       |       |      |       |
| 43 |                                            |       |       |       |       |       |       |       |      |       |
| 44 |                                            |       |       |       |       |       |       |       |      |       |
| 45 |                                            |       |       |       |       |       |       |       |      |       |
| 46 |                                            |       |       |       |       |       |       |       |      |       |
| 47 |                                            |       |       |       |       |       |       |       |      |       |
| 48 |                                            |       |       |       |       |       |       |       |      |       |
| 49 |                                            |       |       |       |       |       |       |       |      |       |
| 50 |                                            |       |       |       |       |       |       |       |      |       |
| 51 |                                            |       |       |       |       |       |       |       |      |       |
| 52 |                                            |       |       |       |       |       |       |       |      |       |
| 53 |                                            |       |       |       |       |       |       |       |      |       |
| 54 |                                            |       |       |       |       |       |       |       |      |       |
| 55 |                                            |       |       |       |       |       |       |       |      |       |
| 56 |                                            |       |       |       |       |       |       |       |      |       |
| 57 |                                            |       |       |       |       |       |       |       |      |       |
| 58 |                                            |       |       |       |       |       |       |       |      |       |
| 59 |                                            |       |       |       |       |       |       |       |      |       |
| 60 |                                            |       |       |       |       |       |       |       |      |       |

### Common multimorbidity combinations

There were 804 possible comorbidity combinations that were identified in the MCC group after statistical analysis, including 72 dyads and 169 triads. The 10 most frequently occurring morbidity dyads and triads are presented respectively in [Table 3](#) and [Table 4](#).

**Table 3** Prevalence of the 10 most common morbidity dyads

| Rank | Morbidity dyads                                                | Prevalence      |        |       | Mean Age |
|------|----------------------------------------------------------------|-----------------|--------|-------|----------|
|      |                                                                | All respondents | female | male  |          |
| 1    | Arthritis or rheumatism and Stomach or other digestive disease | 4.73%           | 3.56%  | 5.96% | 69.20    |
| 2    | Arthritis or rheumatism and Hypertension                       | 2.85%           | 2.20%  | 3.53% | 71.25    |
| 3    | Arthritis or rheumatism and Chronic lung diseases              | 1.13%           | 1.22%  | 1.04% | 71.55    |
| 4    | Hypertension and heart problems                                | 1.03%           | 1.00%  | 1.06% | 71.80    |
| 5    | Hypertension and Stomach or other digestive disease            | 0.89%           | 0.83%  | 0.95% | 69.07    |
| 6    | Hypertension                                                   | 0.86%           | 0.81%  | 0.91% | 68.58    |

|    |                                  |       |       |       |       |
|----|----------------------------------|-------|-------|-------|-------|
|    | and Dyslipidemia                 |       |       |       |       |
|    | Arthritis                        |       |       |       |       |
| 7  | or rheumatism                    | 0.76% | 0.53% | 1.00% | 70.72 |
|    | and heart problems               |       |       |       |       |
|    | Arthritis                        |       |       |       |       |
| 8  | or rheumatism                    | 0.64% | 0.73% | 0.54% | 68.24 |
|    | and Kidney disease               |       |       |       |       |
|    | Hypertension                     |       |       |       |       |
| 9  | and Diabetes or high blood sugar | 0.58% | 0.50% | 0.67% | 70.97 |
|    | Chronic lung diseases and Asthma |       |       |       |       |
| 10 |                                  | 0.53% | 0.65% | 0.40% | 71.15 |

**Table 4** Prevalence of the 10 most common morbidity triads

| Rank | Morbidity triads                                                                      | Prevalence      |        |       | Mean Age |
|------|---------------------------------------------------------------------------------------|-----------------|--------|-------|----------|
|      |                                                                                       | All respondents | female | male  |          |
| 1    | Arthritis or rheumatism, Stomach or other digestive disease and Hypertension          | 1.19%           | 0.80%  | 1.60% | 70.96    |
| 2    | Arthritis or rheumatism, Stomach or other digestive disease and Chronic lung diseases | 0.82%           | 0.97%  | 0.67% | 70.82    |
| 3    | Arthritis or rheumatism, Heart disease and Hypertension                               | 0.63%           | 0.37%  | 0.91% | 69.93    |
| 4    | Arthritis or rheumatism, Heart disease and Stomach or other digestive disease         | 0.59%           | 0.25%  | 0.95% | 71.51    |
| 5    | Hypertension, Dyslipidemia and Arthritis or rheumatism                                | 0.44%           | 0.31%  | 0.57% | 70.13    |
| 6    | Hypertension, Dyslipidemia and Heart problems                                         | 0.42%           | 0.35%  | 0.49% | 71.17    |
| 7    | Arthritis or rheumatism, Kidney disease and Stomach or other digestive disease        | 0.42%           | 0.40%  | 0.44% | 70.14    |
| 8    | Arthritis or rheumatism, Asthma and Chronic lung diseases                             | 0.40%           | 0.46%  | 0.33% | 69.18    |
| 9    | Hypertension, Dyslipidemia and Diabetes or high blood sugar                           | 0.35%           | 0.35%  | 0.35% | 71.51    |
| 10   | Arthritis or rheumatism, Stomach or other digestive disease                           | 0.53%           | 0.57%  | 0.49% | 70.29    |

---

and Liver disease

---

Theoretically, there are 91 dyad combinations and 364 triad combinations possible given the 14 different chronic conditions considered in this study. However, only 72 types (79.12%) of dyads and 169 types (46.43%) of triads emerged in the sample. The 10 most frequently occurring morbidity dyads accounted for 69.01% of the 72 dyad combinations, and the proportion of the 10 most common triad combinations in the 169 triad combinations was 47.05%. Arthritis or rheumatism, which appeared in five of the top 10 dyad combinations and eight of the top 10 triad combinations of chronic conditions, was the main component of the leading morbidity dyads and triads.

There were significant gender differences observed in the occurrences of these multimorbidity combinations. The numbers of women with triad combinations of chronic diseases were generally higher than for men with the same morbidity triads. For example, women had significantly higher prevalence of arthritis and hypertension and hyperlipidemia than men (78.26% vs 21.74%). Among morbidity dyads, the prevalence of heart disease and arthritis or rheumatism in women was nearly two times higher than that in men, while the cluster of arthritis or rheumatism and kidney disease occurred more frequently in men than in women. No age difference was detected in the probability of these particular multimorbidity combinations occurring.

The O/E ratio was also used to analyze the multimorbidity pattern. [15] The higher the O/E value, the higher the probability of coexistence of chronic conditions. [16] Table 5 shows O/E ratios determined for the 10 most prevalent morbidity dyads and triads. The prevalence of each conditions and the dyad and triad prevalence are presented in Annex 2. In the midst of those triad combinations of chronic conditions, the two clusters with significantly higher O/E ratios were emotional, nervous, or psychiatric problems and stroke and memory-related disease (O/E ratio = 10287.72), emotional, nervous, or psychiatric problems and memory-related disorders and asthma (O/E ratio = 8498.56). These four conditions also dominated the three leading dyads



with the highest O/E ratios: 97.73 for the combination of emotional and mental disorders and memory-related diseases, 23.66 for the combination of stroke and memory-related disease and 19.55 for the combination of memory-related disease and asthma.

**Table 5 O/E ratios for the 10 most prevalent morbidity dyads and triads**

| Number of chronic conditions | Rank | Chronic conditions                                                             | O/E ratio |
|------------------------------|------|--------------------------------------------------------------------------------|-----------|
| 2                            | 1    | Chronic lung diseases and Asthma                                               | 162.15    |
|                              | 2    | Emotional, nervous, or psychiatric problems and Memory-related disease         | 97.73     |
|                              | 3    | Dyslipidemia and Diabetes or high blood sugar                                  | 38.39     |
|                              | 4    | Heart disease and Memory-related disease                                       | 25.69     |
|                              | 5    | Stroke and Memory-related disease                                              | 23.66     |
|                              | 6    | Hypertension and Stroke                                                        | 22.85     |
|                              | 7    | Hypertension and Diabetes or high blood sugar                                  | 20.64     |
|                              | 8    | Cancer or malignant tumor and Stroke                                           | 19.55     |
|                              | 9    | Memory-related disease and Asthma                                              | 19.55     |
|                              | 10   | Stroke and Asthma                                                              | 19.55     |
| 3                            | 1    | Stroke, Emotional, nervous, or psychiatric problems and Memory-related disease | 10287.72  |
|                              | 2    | Emotional, nervous, or psychiatric problems, Memory-related disease and Asthma | 8498.56   |
|                              | 3    | Emotional, nervous, or psychiatric problems, Chronic lung diseases and Asthma  | 2274.26   |
|                              | 4    | Heart disease, Stroke and Memory-related disease                               | 2253.50   |
|                              | 5    | Chronic lung diseases, Heart disease and Asthma                                | 1992.69   |
|                              | 6    | Dyslipidemia, Heart disease and Memory-related disease                         | 1443.25   |
|                              | 7    | Hypertension, Dyslipidemia and Diabetes or high blood sugar                    | 1398.31   |

|    |                                                           |         |
|----|-----------------------------------------------------------|---------|
| 8  | Hypertension, Stroke and Memory-related disease           | 1387.35 |
| 9  | Chronic lung diseases, Memory-related disease and Asthma  | 1376.53 |
| 10 | Chronic lung diseases, Arthritis or rheumatism and Asthma | 1265.95 |

## DISCUSSION

This is the first study to estimate the prevalence and patterns of multimorbidity among the elderly in China based on the nationally representative data from CHARLS, which included 11,707 older patients aged 60 years and above with complete data. Although exclusion of incomplete data may cause a selection bias, significant differences between included and excluded cases were not observed. The results of the study indicated that 69.1% of the elderly population in China had at least one of the 14 diseases and 43.6% of them suffered from multimorbidity. The average age of the MCC group was 0.66 years higher than that of the non-MCC group and in the MCC group, the mean age of women was 0.12 years higher than that of men, which was comparable to the results of previous studies. [17-21]

The prevalence of multimorbidity estimated in this study was much lower than that from previous studies in other developed countries. For example, a study of 543 patients over age 65 in Ghent, Belgium showed that the multimorbidity rate was as high as 82.6%, [22]. Another study in Australia showed that 83.2% of the respondents suffered from multimorbidity. [23] However, it is difficult to compare the prevalence generated from different studies due to differences in the selected definitions of multimorbidity, demographic characteristics of the samples, and different study methodologies. [24-28]

In agreement with previous reports, arthritis or rheumatism, hypertension, stomach or other digestive disease were the most common diseases in the MCC group. [11] The prevalence of these three conditions was each above 20% in the entire sample, and above 45% in the MCC group. The most prevalent chronic combinations in the sample

1  
2  
3  
4 could also be found in other studies. [22] The results of this study showed that the  
5 prevalence of arthritis or rheumatism was high and easy to coexist with other conditions.  
6  
7 In addition to the chronic conditions mentioned above, previous studies demonstrated  
8 that women with rheumatoid arthritis might have a predisposition to gallstones which  
9 could manifest in middle or older age compared with women in the general population.  
10  
11 This phenomenon could be related to chronic inflammation and HDL metabolism. [29]  
12  
13

14  
15  
16 Although arthritis or rheumatism, a component of all the leading three morbidity  
17 dyads and triads, was also the most commonly occurring disease in multimorbidity, the  
18 relative risk of this disease was only 4.65, the lowest in the 14 chronic diseases.  
19  
20 Moreover, arthritis or rheumatism is less common in morbidity clusters with large O/E  
21 ratios. Therefore, the frequent occurrence of arthritis or rheumatism in multimorbidity  
22 might be simply due to the high prevalence of the disease. Doctor-diagnosed arthritis  
23 is a common and disabling chronic condition in the world. During 2013 to 2015, an  
24 average of more than one in five (54.4 million) adults in the United States were  
25 diagnosed with arthritis [30]. The unadjusted prevalences of arthritis among adults with  
26 obesity, heart disease, or diabetes were 30.6%, 49.3%, and 47.1%, respectively. In  
27 adults with obesity, heart disease, or diabetes, the age-adjusted prevalences of arthritis  
28 were respectively 1.5, 1.7 and 1.9 times higher than those without these diseases.  
29  
30 Improving the health of adults with arthritis and related comorbid conditions calls for  
31 wider dissemination and implementation of evidence-based interventions, such as self-  
32 management education and physical activity promotion [31].  
33  
34  
35  
36  
37  
38  
39  
40  
41  
42  
43  
44  
45

46  
47 The relative risks for asthma, stroke, heart disease, and six other conditions were all  
48 above 10, which means that patients with these diseases were 10 times more likely to  
49 be afflicted by multimorbidity. These diseases also occurred at a high frequency in  
50 multimorbidity with high O/E ratios, such as the clusters of pulmonary disease and  
51 asthma, emotional and mental illness and memory-related disease, dyslipidemia and  
52 diabetes, and stroke and emotional or mental illness and memory-related disease.  
53  
54  
55  
56  
57  
58  
59 Patients with these diseases were more likely to express comorbidity compared to those  
60

without these diseases, and thus should be the focus of future research studies.

This study featured a nationally representative sample of the Chinese elderly population, which was crucial to get an overall understanding of multimorbidity among the elderly in China. However, there were also limitations with the data sample and study. For example, this study used data from the third wave report of CHARLS, a survey which was conducted in 2015, and there is accordingly a time lag to now that exists. Additionally, the chronic diseases included in the study were not comprehensive, since only 14 chronic conditions were included in the survey. Finally, the data obtained from the survey was based on self-reporting, which may have introduced some misclassification bias or other confounds. Later research on the prevalence and patterns of multimorbidity should be carried out in-depth with a more extensive survey of chronic disease.

## CONCLUSIONS

Multimorbidity remains an underexplored area of research in China. [32]. Despite the increasing prevalence of multimorbidity, there are no specific proposals for its diagnosis and treatment. [33] This study contributes to the understanding of the prevalence and patterns of comorbidity among the elderly in China. Considering China's aging population and the high prevalence of comorbidity in senior citizens, the elderly should be prioritized in the fields of disease prevention and health promotion.

**Acknowledgements** The authors would like to thank the Chinese Center for Disease Control and Prevention and Peking University for access to China Health and Retirement Longitudinal Survey data.

**Contributors** RZ analyzed and interpreted data, drafted the manuscript, approved the final manuscript as submitted. YL revised the manuscript for important intellectual content. YLS analyzed and interpreted data and revised the manuscript for important

1  
2  
3  
4 intellectual content. SLZ analyzed and checked the data of the full text. FC helped on  
5  
6 the study design and revised the manuscript.

7  
8 **Funding** This work was funded by the National Natural Science Foundation of China  
9  
10 (7167030838).

11  
12 **Competing interests** None declared.

13  
14 **Patient consent** Obtained.

15  
16 **Ethics approval** The original CHARLS was approved by the ethics review committee  
17  
18 of Peking University, and all participants gave written informed consent at the time of  
19  
20 participation

21  
22 **Data sharing statement** No additional data are available  
23  
24  
25

## 26 REFERENCES

- 27  
28 1. Barnett K, Mercer SW, Norbury M, et al. Epidemiology of multimorbidity and  
29  
30 implications for health care, research, and medical education: a cross-sectional  
31  
32 study. *Lancet* 2012; 380:37–43.doi:10.1016/S0140-6736(12)60240-2  
33
- 34  
35 2. World Health Organization. Global status report on noncommunicable diseases,  
36  
37 2014.http://apps.who.int/nmh/publications/ncd-status-report-2014/en/index.html  
38  
39 (accessed 27 Oct 2017)
- 40  
41 3. Lee J T, Hamid F, Pati S, et al. Impact of Noncommunicable Disease  
42  
43 Multimorbidity on Healthcare Utilisation and Out-Of-Pocket Expenditures in  
44  
45 Middle-Income Countries: Cross Sectional Analysis. *PLoS One* 2015;10:103-110.  
46  
47 doi: 10.1371/journal.pone.0127199
- 48  
49 4. Moffat K, Mercer SW. Challenges of managing people with multimorbidity in  
50  
51 today's healthcare systems. *BMC Fam Prac*2015;16:129.doi: 10.1186/s12875-015-  
52  
53 0344-4
- 54  
55 5. Schäfer Ingmar, von Leitner Eike-Christin, Schön Gerhard et al. Multimorbidity  
56  
57 patterns in the elderly: a new approach of disease clustering identifies complex  
58  
59 interrelations between chronic conditions. *PLoS One*2010;12:e15941.doi:  
60

- 1  
2  
3  
4 10.1371/journal.pone.0015941  
5  
6 6. Atun R. Transitioning health systems for multimorbidity. *Lancet* 2015;386:721–  
7  
8 2.doi: 10.1016/S0140-6736(14)62254-6  
9  
10 7. Wolff JL, Starfield B, Anderson G. Prevalence, expenditures, and complications of  
11  
12 multiple chronic conditions in the elderly. *Arch Intern Med* 2002;20: 2269-2276.doi:  
13  
14 10.1001/archinte.162.20.2269  
15  
16 8. Yang L, Wu M, Cui B, et al. Economic burden of cardiovascular diseases in China.  
17  
18 *Expert Rev Pharmacoecon Outcomes Res*2008;8:349–56.doi:  
19  
20 10.1586/14737167.8.4.349  
21  
22 9. Zhao Y, Hu Y, Smith JP, et al. Cohort profile: the China Health and Retirement  
23  
24 Longitudinal Study (CHARLS). *Int J Epidemiol* 2014;1:61-69.doi:  
25  
26 10.1093/ije/dys203  
27  
28 10. Van den Bussche H, Koller D, Kolonko T, et al. Which chronic diseases and disease  
29  
30 combinations are specific to multimorbidity in the elderly? Results of a claims data  
31  
32 based cross-sectional study in Germany. *BMC Public Health* 2011;11:101-110.doi:  
33  
34 10.1186/1471-2458-11-101  
35  
36 11. Viera AJ. Odds ratios and risk ratios: what's the difference and why does it matter?  
37  
38 *South Med J* 2008; 7: 30-34.doi:10.1097/SMJ.0b013e31817a7ee4  
39  
40 12. Vettore MV, Meira GF, Rebelo MA et al. Multimorbidity patterns of oral clinical  
41  
42 conditions, social position, and oral health-related quality of life in a population-  
43  
44 based survey of 12-yr-old children. *Eur J Oral Sci.*2016 ; 6:580-590. doi:  
45  
46 10.1111/eos.12304. Epub 2016 Oct 8.  
47  
48 13. Zhang J, Yu KF. What's the relative risk? A method of correcting the odds ratio in  
49  
50 cohort studies of common outcomes. *JAMA*1998;19:1690-1691.doi:  
51  
52 10.1001/jama.280.19.1690  
53  
54 14. McNutt LA, Wu C, Xue X, et al. Estimating the Relative Risk in Cohort Studies  
55  
56 and Clinical Trials of Common Outcomes. *Am J Epidemiol* 2003;10:940–943.doi:  
57  
58 10.1002/cncr.30192  
59  
60

15. Marengoni A, Rizzuto D, Wang HX, et al. Patterns of chronic multimorbidity in the elderly population. *J Am Geriatr Soc* 2009;57:225–30.doi:10.1111/j.1532-5415.2008.02109.x
16. Best WR, Cowper DC. The Ratio of Observed-to-Expected Mortality as a Quality of Care Indicator in Non-Surgical VA Patients. *Med Care* 1994;4:390-400.doi:10.1097/00005650-199404000-00007
17. Kastenholz KE, Weis M, Hagelstein C, et al. Correlation of Observed-to-Expected MRI Fetal Lung Volume and Ultrasound Lung-to-Head Ratio at Different Gestational Times in Fetuses With Congenital Diaphragmatic Hernia. *AJR Am J Roentgenol* 2016;4:856-866.doi:10.2214/AJR.15.15018
18. Melis R, Marengoni A, Angleman S, et al. Incidence and predictors of multimorbidity in the elderly: a population-based longitudinal study. *PLoS One* 2014; 9: e103120.doi:10.1371/journal.pone.0103120
19. Laan W, Bleijenberg N, Drubbel I, et al. Factors associated with increasing functional decline in multimorbid independently living older people. *Maturitas* 2013; 75: 276–81.doi:10.1016/j.maturitas.2013.04.005
20. Eckerblad J, Theander K, Ekdahl A, et al. To adjust and endure: a qualitative study of symptom burden in older people with multimorbidity. *Appl Nurs Res* 2015;28:322–7.doi:10.1016/j.apnr.2015.03.008
21. Wister A, Kendig H, Mitchell B, et al. Multimorbidity, health and aging in Canada and Australia: a tale of two countries. *BMC Geriatr* 2016;1:163-176.doi:10.1186/s12877-016-0341-z
22. Afshar S, Roderick PJ, Kowal P, et al. Multimorbidity and the inequalities of global ageing: a cross-sectional study of 28 countries using the World Health Surveys. *BMC Public Health* 2015;15:776-786.doi:10.1186/s12889-015-2008-7
23. Boeckxstaens P, Peersman W, Goubin G, et al. A practice-based analysis of combinations of diseases in patients aged 65 or older in primary care. *BMC Family Practice* 2014;1:1-6.doi: 10.1186/1471-2296-15-159.
24. Britt HC , Harrison CM , Miller GC , et al . Prevalence and patterns of

- 1  
2  
3 multimorbidity in Australia. *Med J Aust* 2008;2: 72-77  
4  
5 25. Glynn LG , Valderas JM , Healy P , et al . The prevalence of multimorbidity in  
6 primary care and its effect on health care utilization and cost. *Fam Pract*  
7 2011;28:516–23.doi:10.1093/fampra/cmr013  
8  
9 26. Marengoni A , Angleman S , Melis R , et al . Aging with multimorbidity: a  
10 systematic review of the literature. *Ageing Res Rev* 2011;10:430–  
11 9.doi:10.1016/j.arr.2011.03.003  
12  
13 27. Barnett K , Mercer SW , Norbury M , et al . Epidemiology of multimorbidity and  
14 implications for health care, research, and medical education: a cross-sectional  
15 study. *Lancet* 2012;380:37–43.doi:10.1016/S0140-6736(12)60240-2  
16  
17 28. Fortin M , Stewart M , Poitras ME , et al . A systematic review of prevalence studies  
18 on multimorbidity: toward a more uniform methodology. *Ann Fam Med*  
19 2012;10:142–51.doi:10.1370/afm.1337.  
20  
21 29. García-Gómez M C, De L E, Ordoñez-Palau S, et al. High Prevalence of Gallstone  
22 Disease in Rheumatoid Arthritis: A New Comorbidity Related to Dyslipidemia? [J].  
23 *Reumatol Clin*, 2017;14:294-300. doi: 10.1016/j.reuma.2018.03.012.  
24  
25 30. Barbour KE, Helmick CG, Boring M, et al. Vital Signs: Prevalence of Doctor-  
26 Diagnosed Arthritis and Arthritis-Attributable Activity Limitation — United States,  
27 2013–2015. *MMWR Morb Mortal Wkly Rep*, 2017;66:246–253. doi:  
28 http://dx.doi.org/10.15585/mmwr.mm6609e1.  
29  
30 31. Ward BW, Schiller JS. Prevalence of multiple chronic conditions among US adults:  
31 estimates from the National Health Interview Survey, 2010. *Prev Chronic Dis*  
32 2013;10:120203. doi: 10.5888/pcd10.120203  
33  
34 32. Bao W, Hu D, Shi X, et al. Comorbidity increased the risk of falls in Chinese older  
35 adults: A cross-sectional study. *Int J Clin Exp Med*,2017;7:10753-10763.  
36  
37 33. Gao N, Yuan Z, Tang X, et al. Prevalence of CHD-related metabolic comorbidity  
38 of diabetes mellitus in Northern Chinese adults: the REACTION study. *J Diabetes*  
39 *Complications*2016;2:199-205.doi:10.1016/j.jdiacomp.2015.11.018  
40  
41  
42  
43  
44  
45  
46  
47  
48  
49  
50  
51  
52  
53  
54  
55  
56  
57  
58  
59  
60



## Figure legends

**Figure 1** Flowchart for selecting the study sample from the original sample population. CHARLS, China Health and Retirement Longitudinal Survey

**Figure 2** Frequency and percentage of people aged over 60 suffering from different diseases based on CHARLS data

**Figure 3** Prevalence Rates of chronic condition in elderly people over 60 years old based on CHARLS data



Figure 1 Flowchart for selecting the study sample from the original sample population. CHARLS, China Health and Retirement Longitudinal Survey

171x93mm (300 x 300 DPI)



Figure 2 Frequency and percentage of people aged over 60 suffering from different diseases based on CHARLS data

222x119mm (300 x 300 DPI)



Figure 3 Prevalence Rates of chronic condition in elderly people over 60 years old based on CHARLS data

151x140mm (300 x 300 DPI)

**Annex 1 Sensitivity analysis, Comparison of the characteristics of complete cases and incomplete cases**

|                               | <b>Complete cases</b> | <b>Incomplete cases</b> | <b>P*</b> |
|-------------------------------|-----------------------|-------------------------|-----------|
| Number of people              | 11707                 | 876                     |           |
| Proportion (%)                | 93.04%                | 6.96%                   |           |
| Mean age All respondents (SD) | 70.20(7.907)          | 69.60 (7.824)           | <0.001    |
| <b>Male</b> (SD)              | 69.97(7.575)          | 69.58 (7.721)           | <0.001    |
| <b>Female</b> (SD)            | 70.39(8.189)          | 69.62 (7.973)           | <0.001    |
| Gender (% females)            | 51.28%                | 49.27%                  | 0.193     |

p\* = statistical significance of the difference between the complete cases and the incomplete cases (t-tests were performed for comparison of means, and chi-square-tests for differences between percentages)

**Annex 2 O/E ratio of all binary and triads comorbidities pattern present in participants**

| Rank | binary comorbidities pattern                                           | O/E ratio |
|------|------------------------------------------------------------------------|-----------|
| 1    | Chronic lung diseases and Asthma                                       | 161.00    |
| 2    | Emotional, nervous, or psychiatric problems and Memory-related disease | 98.57     |
| 3    | Dyslipidemia and Diabetes or high blood sugar                          | 38.69     |
| 4    | Heart disease and Memory-related disease                               | 25.96     |
| 5    | Stroke and Memory-related disease                                      | 24.19     |
| 6    | Hypertension and Stroke                                                | 23.10     |
| 7    | Hypertension and Diabetes or high blood sugar                          | 20.77     |
| 8    | Cancer or malignant tumor and Stroke                                   | 19.71     |
| 9    | Memory-related disease and Asthma                                      | 19.71     |
| 10   | Stroke and Asthma                                                      | 19.71     |
| 11   | Hypertension and Heart disease                                         | 19.07     |
| 12   | Hypertension and Dyslipidemia                                          | 18.98     |
| 13   | Dyslipidemia and Heart disease                                         | 17.39     |
| 14   | Diabetes or high blood sugar and Heart disease                         | 14.87     |
| 15   | Diabetes or high blood sugar and Liver disease                         | 14.40     |
| 16   | Cancer or malignant tumor and Liver disease                            | 13.65     |
| 17   | Diabetes or high blood sugar and Kidney disease                        | 13.38     |
| 18   | Hypertension and Memory-related disease                                | 13.33     |
| 19   | Dyslipidemia and Cancer or malignant tumor                             | 12.51     |
| 20   | Stomach or other digestive disease and Arthritis or rheumatism         | 10.80     |
| 21   | Liver disease and Heart disease                                        | 10.49     |
| 22   | Dyslipidemia and Stroke                                                | 10.23     |
| 23   | Dyslipidemia and Stomach or other digestive disease                    | 9.81      |
| 24   | Dyslipidemia and Kidney disease                                        | 9.61      |
| 25   | Chronic lung diseases and Memory-related disease                       | 9.56      |
| 26   | Chronic lung diseases and Stroke                                       | 9.56      |
| 27   | Kidney disease and Arthritis or rheumatism                             | 9.42      |
| 28   | Heart disease and Kidney disease                                       | 9.29      |
| 29   | Chronic lung diseases and Heart disease                                | 9.12      |
| 30   | Stomach or other digestive disease and Asthma                          | 9.03      |
| 31   | Liver disease and Kidney disease                                       | 8.99      |
| 32   | Kidney disease and Stomach or other digestive disease                  | 8.92      |
| 33   | Memory-related disease and Arthritis or rheumatism                     | 8.89      |
| 34   | Stroke and Arthritis or rheumatism                                     | 8.89      |
| 35   | Arthritis or rheumatism and Asthma                                     | 8.77      |
| 36   | Liver disease and Memory-related disease                               | 8.38      |
| 37   | Diabetes or high blood sugar and Memory-related disease                | 8.32      |
| 38   | Diabetes or high blood sugar and Stroke                                | 8.32      |
| 39   | Chronic lung diseases and Arthritis or rheumatism                      | 8.14      |
| 40   | Heart disease and Stomach or other digestive disease                   | 8.11      |

|    |    |                                                                         |      |
|----|----|-------------------------------------------------------------------------|------|
| 1  |    |                                                                         |      |
| 2  |    |                                                                         |      |
| 3  | 41 | Heart disease and Arthritis or rheumatism                               | 7.45 |
| 4  |    |                                                                         |      |
| 5  | 42 | Stomach or other digestive disease and Emotional, nervous, or           | 7.39 |
| 6  |    | psychiatric problems                                                    |      |
| 7  | 43 | Liver disease and Stomach or other digestive disease                    | 7.33 |
| 8  | 44 | Diabetes or high blood sugar and Cancer or malignant tumor              | 6.78 |
| 9  | 45 | Diabetes or high blood sugar and Asthma                                 | 6.78 |
| 10 | 46 | Diabetes or high blood sugar and Arthritis or rheumatism                | 6.44 |
| 11 | 47 | Liver disease and Arthritis or rheumatism                               | 6.16 |
| 12 | 48 | Chronic lung diseases and Kidney disease                                | 5.98 |
| 13 | 49 | Chronic lung diseases and Stomach or other digestive disease            | 5.97 |
| 14 | 50 | Hypertension and Arthritis or rheumatism                                | 5.74 |
| 15 | 51 | Chronic lung diseases and Liver disease                                 | 5.52 |
| 16 | 52 | Kidney disease and Emotional, nervous, or psychiatric problems          | 5.29 |
| 17 | 53 | Kidney disease and Asthma                                               | 5.29 |
| 18 | 54 | Chronic lung diseases and Emotional, nervous, or psychiatric problems   | 5.19 |
| 19 | 55 | Dyslipidemia and Memory-related disease                                 | 5.12 |
| 20 | 56 | Hypertension and Emotional, nervous, or psychiatric problems            | 5.07 |
| 21 | 57 | Hypertension and Chronic lung diseases                                  | 5.03 |
| 22 | 58 | Hypertension and Kidney disease                                         | 5.01 |
| 23 | 59 | Cancer or malignant tumor and Arthritis or rheumatism                   | 4.96 |
| 24 | 60 | Cancer or malignant tumor and Stomach or other digestive disease        | 4.93 |
| 25 | 61 | Dyslipidemia and Arthritis or rheumatism                                | 4.75 |
| 26 | 62 | Hypertension and Liver disease                                          | 4.61 |
| 27 | 63 | Diabetes or high blood sugar and Chronic lung diseases                  | 4.38 |
| 28 | 64 | Heart disease and Stroke                                                | 4.33 |
| 29 | 65 | Dyslipidemia and Asthma                                                 | 4.17 |
| 30 | 66 | Hypertension and Stomach or other digestive disease                     | 3.85 |
| 31 | 67 | Cancer or malignant tumor and Heart disease                             | 3.53 |
| 32 | 68 | Heart disease and Asthma                                                | 3.53 |
| 33 | 69 | Emotional, nervous, or psychiatric problems and Arthritis or rheumatism | 3.43 |
| 34 | 70 | Diabetes or high blood sugar and Stomach or other digestive disease     | 3.12 |
| 35 | 71 | Hypertension and Cancer or malignant tumor                              | 2.17 |
| 36 | 72 | Hypertension and Asthma                                                 | 2.17 |
| 37 | 73 | Stomach or other digestive disease and Memory-related disease           | 2.02 |
| 38 | 74 | Stroke and Stomach or other digestive disease                           | 2.02 |
| 39 | 75 | Dyslipidemia and Liver disease                                          | 1.77 |
| 40 | 76 | Dyslipidemia and Chronic lung diseases                                  | 1.35 |
| 41 |    |                                                                         |      |
| 42 |    |                                                                         |      |
| 43 |    |                                                                         |      |
| 44 |    |                                                                         |      |
| 45 |    |                                                                         |      |
| 46 |    |                                                                         |      |
| 47 |    |                                                                         |      |
| 48 |    |                                                                         |      |
| 49 |    |                                                                         |      |
| 50 |    |                                                                         |      |
| 51 |    |                                                                         |      |
| 52 |    |                                                                         |      |
| 53 |    |                                                                         |      |
| 54 |    |                                                                         |      |
| 55 |    |                                                                         |      |
| 56 |    |                                                                         |      |
| 57 |    |                                                                         |      |
| 58 |    |                                                                         |      |
| 59 |    |                                                                         |      |
| 60 |    |                                                                         |      |

| Rank | triads comorbidities pattern                                                               | O/E ratio |
|------|--------------------------------------------------------------------------------------------|-----------|
| 1    | Stroke, Emotional, nervous, or psychiatric problems and Memory-related disease             | 10491.60  |
| 2    | Emotional, nervous, or psychiatric problems, Memory-related disease, Asthma,               | 8548.88   |
| 3    | Heart disease, Stroke and Memory-related disease                                           | 2302.62   |
| 4    | Chronic lung diseases, Emotional, nervous, or psychiatric problems and Asthma              | 2252.13   |
| 5    | Chronic lung diseases, Heart disease, Asthma,                                              | 1977.13   |
| 6    | Dyslipidemia, Heart disease and Memory-related disease                                     | 1461.04   |
| 7    | Hypertension, Stroke and Memory-related disease                                            | 1418.54   |
| 8    | Hypertension, Dyslipidemia and Diabetes or high blood sugar                                | 1409.29   |
| 9    | Chronic lung diseases, Memory-related disease and Asthma                                   | 1381.96   |
| 10   | Chronic lung diseases, Arthritis or rheumatism and Asthma                                  | 1256.63   |
| 11   | Dyslipidemia, Diabetes or high blood sugar and Kidney disease                              | 1255.51   |
| 12   | Cancer or malignant tumor, Chronic lung diseases and Asthma                                | 1126.07   |
| 13   | Chronic lung diseases, Kidney disease and Asthma                                           | 1112.24   |
| 14   | Liver disease, Kidney disease and Asthma                                                   | 974.52    |
| 15   | Dyslipidemia, Diabetes or high blood sugar and Liver disease                               | 972.21    |
| 16   | Chronic lung diseases, Liver disease and Asthma                                            | 956.96    |
| 17   | Dyslipidemia, Diabetes or high blood sugar and Stroke                                      | 935.99    |
| 18   | Chronic lung diseases, Stomach or other digestive disease and Asthma                       | 921.21    |
| 19   | Hypertension, Dyslipidemia and Heart disease                                               | 876.36    |
| 20   | Diabetes or high blood sugar, Liver disease and Kidney disease                             | 822.11    |
| 21   | Hypertension, Diabetes or high blood sugar and Stroke                                      | 812.58    |
| 22   | Hypertension, Chronic lung diseases and Asthma                                             | 812.01    |
| 23   | Hypertension, Dyslipidemia and Stroke                                                      | 800.07    |
| 24   | Dyslipidemia, Heart disease and Asthma                                                     | 793.67    |
| 25   | Diabetes or high blood sugar, Heart disease and Stroke                                     | 791.41    |
| 26   | Hypertension, Emotional, nervous, or psychiatric problems and Memory-related disease       | 770.58    |
| 27   | Dyslipidemia, Diabetes or high blood sugar and Cancer or malignant tumor                   | 762.67    |
| 28   | Dyslipidemia, Diabetes or high blood sugar and Emotional, nervous, or psychiatric problems | 762.67    |
| 29   | Dyslipidemia, Diabetes or high blood sugar and Heart disease                               | 669.54    |
| 30   | Liver disease, Heart disease and Emotional, nervous, or psychiatric problems               | 649.62    |
| 31   | Heart disease, Kidney disease and Memory-related disease                                   | 617.74    |
| 32   | Heart disease, Stroke and Kidney disease                                                   | 617.74    |
| 33   | Dyslipidemia, Chronic lung diseases and Asthma                                             | 584.58    |
| 34   | Diabetes or high blood sugar, Liver disease and Heart disease                              | 548.02    |



|    |                                                                                                            |        |
|----|------------------------------------------------------------------------------------------------------------|--------|
| 35 | Hypertension, Diabetes or high blood sugar and Heart disease                                               | 523.14 |
| 36 | Hypertension, Heart disease and Stroke                                                                     | 507.36 |
| 37 | Diabetes or high blood sugar, Chronic lung diseases and Asthma                                             | 474.98 |
| 38 | Liver disease, Stomach or other digestive disease and Asthma                                               | 454.02 |
| 39 | Stomach or other digestive disease, Emotional, nervous, or psychiatric problems and Memory-related disease | 437.10 |
| 40 | Hypertension, Memory-related disease, Asthma,                                                              | 385.29 |
| 41 | Diabetes or high blood sugar, Stomach or other digestive disease and Asthma                                | 300.46 |
| 42 | Hypertension, Dyslipidemia and Memory-related disease                                                      | 300.03 |
| 43 | Liver disease, Kidney disease and Arthritis or rheumatism                                                  | 277.66 |
| 44 | Hypertension, Heart disease and Memory-related disease                                                     | 253.68 |
| 45 | Dyslipidemia, Liver disease and Kidney disease                                                             | 252.95 |
| 46 | Hypertension, Chronic lung diseases and Stroke                                                             | 249.13 |
| 47 | Stroke, Memory-related disease and Arthritis or rheumatism                                                 | 249.11 |
| 48 | Dyslipidemia, Chronic lung diseases and Liver disease                                                      | 248.40 |
| 49 | Cancer or malignant tumor, Chronic lung diseases and Heart disease                                         | 247.14 |
| 50 | Chronic lung diseases, Heart disease and Emotional, nervous, or psychiatric problems                       | 247.14 |
| 51 | Hypertension, Dyslipidemia and Asthma                                                                      | 244.47 |
| 52 | Cancer or malignant tumor, Heart disease and Stomach or other digestive disease                            | 234.50 |
| 53 | Chronic lung diseases, Memory-related disease and Arthritis or rheumatism                                  | 229.69 |
| 54 | Chronic lung diseases, Stroke and Stomach or other digestive disease                                       | 211.98 |
| 55 | Hypertension, Stroke and Arthritis or rheumatism                                                           | 210.41 |
| 56 | Chronic lung diseases, Liver disease and Heart disease                                                     | 210.03 |
| 57 | Hypertension, Cancer or malignant tumor and Heart disease                                                  | 206.71 |
| 58 | Hypertension, Heart disease and Emotional, nervous, or psychiatric problems                                | 206.71 |
| 59 | Memory-related disease, Arthritis or rheumatism and Asthma                                                 | 202.98 |
| 60 | Emotional, nervous, or psychiatric problems, Memory-related disease and Arthritis or rheumatism            | 202.98 |
| 61 | Stroke, Emotional, nervous, or psychiatric problems and Arthritis or rheumatism                            | 202.98 |
| 62 | Stroke, Kidney disease and Arthritis or rheumatism                                                         | 200.49 |
| 63 | Dyslipidemia, Diabetes or high blood sugar and Stomach or other digestive disease                          | 194.98 |
| 64 | Liver disease, Stomach or other digestive disease and Memory-related disease                               | 185.73 |
| 65 | Dyslipidemia, Stomach or other digestive disease and Asthma                                                | 184.90 |
| 66 | Diabetes or high blood sugar, Stomach or other digestive disease and Memory-related disease                | 184.37 |
| 67 | Diabetes or high blood sugar, Heart disease and Arthritis or rheumatism                                    | 183.74 |

1  
2  
3  
4  
5  
6  
7  
8  
9  
10  
11  
12  
13  
14  
15  
16  
17  
18  
19  
20  
21  
22  
23  
24  
25  
26  
27  
28  
29  
30  
31  
32  
33  
34  
35  
36  
37  
38  
39  
40  
41  
42  
43  
44  
45  
46  
47  
48  
49  
50  
51  
52  
53  
54  
55  
56  
57  
58  
59  
60

|     |                                                                                                   |        |
|-----|---------------------------------------------------------------------------------------------------|--------|
| 68  | Chronic lung diseases, Stroke and Arthritis or rheumatism                                         | 164.06 |
| 69  | Kidney disease, Arthritis or rheumatism and Asthma                                                | 163.36 |
| 70  | Dyslipidemia, Diabetes or high blood sugar and Arthritis or rheumatism                            | 162.98 |
| 71  | Hypertension, Diabetes or high blood sugar and Memory-related disease                             | 162.52 |
| 72  | Hypertension, Dyslipidemia and Kidney disease                                                     | 160.98 |
| 73  | Hypertension, Heart disease and Kidney disease                                                    | 158.80 |
| 74  | Chronic lung diseases, Liver disease and Kidney disease                                           | 157.53 |
| 75  | Dyslipidemia, Liver disease and Stomach or other digestive disease                                | 157.13 |
| 76  | Heart disease, Kidney disease and Stomach or other digestive disease                              | 154.42 |
| 77  | Cancer or malignant tumor, Liver disease and Stomach or other digestive disease                   | 151.34 |
| 78  | Liver disease, Stomach or other digestive disease and Emotional, nervous, or psychiatric problems | 151.34 |
| 79  | Heart disease, Arthritis or rheumatism and Asthma                                                 | 145.20 |
| 80  | Stroke, Kidney disease and Stomach or other digestive disease                                     | 143.91 |
| 81  | Liver disease, Emotional, nervous, or psychiatric problems and Arthritis or rheumatism            | 140.56 |
| 82  | Diabetes or high blood sugar, Arthritis or rheumatism and Asthma                                  | 139.53 |
| 83  | Hypertension, Dyslipidemia and Liver disease                                                      | 138.50 |
| 84  | Hypertension, Heart disease and Asthma                                                            | 137.80 |
| 85  | Kidney disease, Stomach or other digestive disease and Arthritis or rheumatism                    | 136.43 |
| 86  | Chronic lung diseases, Emotional, nervous, or psychiatric problems and Arthritis or rheumatism    | 133.68 |
| 87  | Hypertension, Liver disease and Asthma                                                            | 133.40 |
| 88  | Hypertension, Diabetes or high blood sugar and Cancer or malignant tumor                          | 132.42 |
| 89  | Chronic lung diseases, Stomach or other digestive disease and Arthritis or rheumatism             | 131.24 |
| 90  | Hypertension, Diabetes or high blood sugar and Kidney disease                                     | 130.80 |
| 91  | Heart disease, Stomach or other digestive disease and Arthritis or rheumatism                     | 128.06 |
| 92  | Dyslipidemia, Heart disease and Stomach or other digestive disease                                | 121.74 |
| 93  | Hypertension, Heart disease and Arthritis or rheumatism                                           | 121.06 |
| 94  | Stomach or other digestive disease, Arthritis or rheumatism and Asthma                            | 118.39 |
| 95  | Chronic lung diseases, Heart disease and Arthritis or rheumatism                                  | 117.36 |
| 96  | Hypertension, Liver disease and Heart disease                                                     | 117.11 |
| 97  | Diabetes or high blood sugar, Kidney disease and Arthritis or rheumatism                          | 114.85 |
| 98  | Chronic lung diseases, Heart disease and Stomach or other digestive disease                       | 113.73 |
| 99  | Hypertension, Diabetes or high blood sugar and Liver disease                                      | 112.54 |
| 100 | Diabetes or high blood sugar, Chronic lung diseases and Heart disease                             | 104.24 |
| 101 | Liver disease, Stomach or other digestive disease and Arthritis or rheumatism                     | 104.21 |
| 102 | Stroke, Stomach or other digestive disease and Arthritis or rheumatism                            | 103.78 |

|     |                                                                                                  |        |
|-----|--------------------------------------------------------------------------------------------------|--------|
| 103 | Hypertension, Kidney disease and Emotional, nervous, or psychiatric problems                     | 103.36 |
| 104 | Chronic lung diseases, Liver disease and Arthritis or rheumatism                                 | 102.25 |
| 105 | Hypertension, Dyslipidemia and Arthritis or rheumatism                                           | 100.61 |
| 106 | Liver disease, Kidney disease and Stomach or other digestive disease                             | 99.65  |
| 107 | Dyslipidemia, Cancer or malignant tumor and Stomach or other digestive disease                   | 92.45  |
| 108 | Dyslipidemia, Stomach or other digestive disease and Emotional, nervous, or psychiatric problems | 92.45  |
| 109 | Hypertension, Dyslipidemia and Chronic lung diseases                                             | 92.21  |
| 110 | Hypertension, Chronic lung diseases and Heart disease                                            | 89.11  |
| 111 | Heart disease, Stroke and Arthritis or rheumatism                                                | 89.10  |
| 112 | Hypertension, Heart disease and Stomach or other digestive disease                               | 88.07  |
| 113 | Chronic lung diseases, Heart disease and Kidney disease                                          | 81.37  |
| 114 | Chronic lung diseases, Kidney disease and Arthritis or rheumatism                                | 79.23  |
| 115 | Diabetes or high blood sugar, Chronic lung diseases and Arthritis or rheumatism                  | 78.94  |
| 116 | Chronic lung diseases, Kidney disease and Stomach or other digestive disease                     | 75.82  |
| 117 | Hypertension, Diabetes or high blood sugar and Arthritis or rheumatism                           | 75.46  |
| 118 | Hypertension, Dyslipidemia and Stomach or other digestive disease                                | 75.00  |
| 119 | Chronic lung diseases, Liver disease and Stomach or other digestive disease                      | 73.39  |
| 120 | Hypertension, Memory-related disease and Arthritis or rheumatism                                 | 73.19  |
| 121 | Stomach or other digestive disease, Memory-related disease and Arthritis or rheumatism           | 72.65  |
| 122 | Heart disease, Kidney disease and Arthritis or rheumatism                                        | 71.71  |
| 123 | Liver disease, Arthritis or rheumatism and Asthma                                                | 70.28  |
| 124 | Diabetes or high blood sugar, Cancer or malignant tumor and Arthritis or rheumatism              | 69.76  |
| 125 | Kidney disease, Memory-related disease and Arthritis or rheumatism                               | 66.83  |
| 126 | Dyslipidemia, Heart disease and Arthritis or rheumatism                                          | 65.96  |
| 127 | Diabetes or high blood sugar, Heart disease and Stomach or other digestive disease               | 65.94  |
| 128 | Dyslipidemia, Chronic lung diseases and Heart disease                                            | 64.15  |
| 129 | Hypertension, Kidney disease and Arthritis or rheumatism                                         | 63.81  |
| 130 | Dyslipidemia, Stomach or other digestive disease and Arthritis or rheumatism                     | 63.66  |
| 131 | Hypertension, Chronic lung diseases and Memory-related disease                                   | 62.28  |
| 132 | Dyslipidemia, Kidney disease and Stomach or other digestive disease                              | 60.88  |
| 133 | Hypertension, Stroke and Stomach or other digestive disease                                      | 59.10  |
| 134 | Cancer or malignant tumor, Chronic lung diseases and Stomach or other digestive disease          | 57.58  |

|    |     |                                                                             |
|----|-----|-----------------------------------------------------------------------------|
| 1  |     |                                                                             |
| 2  |     |                                                                             |
| 3  |     |                                                                             |
| 4  | 135 | Cancer or malignant tumor, Chronic lung diseases and Arthritis or           |
| 5  |     | rheumatism                                                                  |
| 6  |     | 53.47                                                                       |
| 7  | 136 | Hypertension, Stomach or other digestive disease and Arthritis or           |
| 8  |     | rheumatism                                                                  |
| 9  |     | 52.98                                                                       |
| 10 | 137 | Dyslipidemia, Memory-related disease and Arthritis or rheumatism            |
| 11 |     | 52.69                                                                       |
| 12 | 138 | Dyslipidemia, Stroke and Arthritis or rheumatism                            |
| 13 |     | 52.69                                                                       |
| 14 | 139 | Hypertension, Cancer or malignant tumor and Chronic lung diseases           |
| 15 |     | 50.75                                                                       |
| 16 | 140 | Hypertension, Chronic lung diseases and Kidney disease                      |
| 17 |     | 50.13                                                                       |
| 18 | 141 | Liver disease, Heart disease and Arthritis or rheumatism                    |
| 19 |     | 46.27                                                                       |
| 20 | 142 | Hypertension, Cancer or malignant tumor and Arthritis or rheumatism         |
| 21 |     | 44.73                                                                       |
| 22 | 143 | Hypertension, Liver disease and Kidney disease                              |
| 23 |     | 43.92                                                                       |
| 24 | 144 | Hypertension, Chronic lung diseases and Liver disease                       |
| 25 |     | 43.13                                                                       |
| 26 | 145 | Dyslipidemia, Cancer or malignant tumor and Arthritis or rheumatism         |
| 27 |     | 42.93                                                                       |
| 28 | 146 | Dyslipidemia, Arthritis or rheumatism and Asthma                            |
| 29 |     | 42.93                                                                       |
| 30 | 147 | Hypertension, Diabetes or high blood sugar and Chronic lung diseases        |
| 31 |     | 42.81                                                                       |
| 32 | 148 | Dyslipidemia, Kidney disease and Arthritis or rheumatism                    |
| 33 |     | 42.40                                                                       |
| 34 | 149 | Stomach or other digestive disease, Emotional, nervous, or psychiatric      |
| 35 |     | problems and Arthritis or rheumatism                                        |
| 36 |     | 42.28                                                                       |
| 37 | 150 | Hypertension, Liver disease and Arthritis or rheumatism                     |
| 38 |     | 41.18                                                                       |
| 39 | 151 | Hypertension, Stomach or other digestive disease and Memory-related         |
| 40 |     | disease                                                                     |
| 41 |     | 39.40                                                                       |
| 42 | 152 | Diabetes or high blood sugar, Stomach or other digestive disease and        |
| 43 |     | Arthritis or rheumatism                                                     |
| 44 |     | 39.24                                                                       |
| 45 | 153 | Hypertension, Arthritis or rheumatism and Asthma                            |
| 46 |     | 37.27                                                                       |
| 47 | 154 | Dyslipidemia, Liver disease and Arthritis or rheumatism                     |
| 48 |     | 36.48                                                                       |
| 49 | 155 | Heart disease, Emotional, nervous, or psychiatric problems and Arthritis or |
| 50 |     | rheumatism                                                                  |
| 51 |     | 36.30                                                                       |
| 52 | 156 | Hypertension, Chronic lung diseases and Arthritis or rheumatism             |
| 53 |     | 34.95                                                                       |
| 54 | 157 | Dyslipidemia, Chronic lung diseases and Arthritis or rheumatism             |
| 55 |     | 34.70                                                                       |
| 56 | 158 | Hypertension, Diabetes or high blood sugar and Stomach or other digestive   |
| 57 |     | disease                                                                     |
| 58 |     | 33.85                                                                       |
| 59 | 159 | Cancer or malignant tumor, Stomach or other digestive disease and           |
| 60 |     | Arthritis or rheumatism                                                     |
|    |     | 33.83                                                                       |
|    | 160 | Liver disease, Heart disease and Stomach or other digestive disease         |
|    |     | 33.21                                                                       |
|    | 161 | Dyslipidemia, Chronic lung diseases and Stomach or other digestive          |
|    |     | disease                                                                     |
|    |     | 29.89                                                                       |
|    | 162 | Diabetes or high blood sugar, Liver disease and Arthritis or rheumatism     |
|    |     | 29.64                                                                       |
|    | 163 | Hypertension, Kidney disease and Stomach or other digestive disease         |
|    |     | 26.42                                                                       |
|    | 164 | Diabetes or high blood sugar, Chronic lung diseases and Stomach or other    |
|    |     | digestive disease                                                           |
|    |     | 24.29                                                                       |
|    | 165 | Hypertension, Emotional, nervous, or psychiatric problems and Arthritis or  |
|    |     | rheumatism                                                                  |
|    |     | 22.36                                                                       |
|    | 166 | Hypertension, Liver disease and Stomach or other digestive disease          |
|    |     | 20.46                                                                       |

---

|     |                                                                                                  |       |
|-----|--------------------------------------------------------------------------------------------------|-------|
| 167 | Hypertension, Cancer or malignant tumor and Stomach or other digestive disease                   | 16.05 |
| 168 | Hypertension, Stomach or other digestive disease and Emotional, nervous, or psychiatric problems | 16.05 |
| 169 | Hypertension, Chronic lung diseases and Stomach or other digestive disease                       | 15.57 |

---

For peer review only

**STROBE 2007 (v4) checklist of items to be included in reports of observational studies in epidemiology\***  
**Checklist for cohort, case-control, and cross-sectional studies (combined)**

| Section/Topic             | Item # | Recommendation                                                                                                                                                                                                                                                                                                                                                                                                                                                         | Reported on page # |
|---------------------------|--------|------------------------------------------------------------------------------------------------------------------------------------------------------------------------------------------------------------------------------------------------------------------------------------------------------------------------------------------------------------------------------------------------------------------------------------------------------------------------|--------------------|
| Title and abstract        | 1      | (a) Indicate the study's design with a commonly used term in the title or the abstract                                                                                                                                                                                                                                                                                                                                                                                 | 1                  |
|                           |        | (b) Provide in the abstract an informative and balanced summary of what was done and what was found                                                                                                                                                                                                                                                                                                                                                                    | 2                  |
| <b>Introduction</b>       |        |                                                                                                                                                                                                                                                                                                                                                                                                                                                                        |                    |
| Background/rationale      | 2      | Explain the scientific background and rationale for the investigation being reported                                                                                                                                                                                                                                                                                                                                                                                   | 4                  |
| Objectives                | 3      | State specific objectives, including any pre-specified hypotheses                                                                                                                                                                                                                                                                                                                                                                                                      | 4                  |
| <b>Methods</b>            |        |                                                                                                                                                                                                                                                                                                                                                                                                                                                                        |                    |
| Study design              | 4      | Present key elements of study design early in the paper                                                                                                                                                                                                                                                                                                                                                                                                                | 4                  |
| Setting                   | 5      | Describe the setting, locations, and relevant dates, including periods of recruitment, exposure, follow-up, and data collection                                                                                                                                                                                                                                                                                                                                        | 4                  |
| Participants              | 6      | (a) <i>Cohort study</i> —Give the eligibility criteria, and the sources and methods of selection of participants. Describe methods of follow-up<br><i>Case-control study</i> —Give the eligibility criteria, and the sources and methods of case ascertainment and control selection. Give the rationale for the choice of cases and controls<br><i>Cross-sectional study</i> —Give the eligibility criteria, and the sources and methods of selection of participants | 4                  |
|                           |        | (b) <i>Cohort study</i> —For matched studies, give matching criteria and number of exposed and unexposed<br><i>Case-control study</i> —For matched studies, give matching criteria and the number of controls per case                                                                                                                                                                                                                                                 | Not applicable     |
| Variables                 | 7      | Clearly define all outcomes, exposures, predictors, potential confounders, and effect modifiers. Give diagnostic criteria, if applicable                                                                                                                                                                                                                                                                                                                               | 5                  |
| Data sources/ measurement | 8*     | For each variable of interest, give sources of data and details of methods of assessment (measurement). Describe comparability of assessment methods if there is more than one group                                                                                                                                                                                                                                                                                   | 4                  |
| Bias                      | 9      | Describe any efforts to address potential sources of bias                                                                                                                                                                                                                                                                                                                                                                                                              | Not applicable     |
| Study size                | 10     | Explain how the study size was arrived at                                                                                                                                                                                                                                                                                                                                                                                                                              | 4                  |
| Quantitative variables    | 11     | Explain how quantitative variables were handled in the analyses. If applicable, describe which groupings were chosen and why                                                                                                                                                                                                                                                                                                                                           | 5                  |
| Statistical methods       | 12     | (a) Describe all statistical methods, including those used to control for confounding                                                                                                                                                                                                                                                                                                                                                                                  | 5                  |
|                           |        | (b) Describe any methods used to examine subgroups and interactions                                                                                                                                                                                                                                                                                                                                                                                                    | 5                  |
|                           |        | (c) Explain how missing data were addressed                                                                                                                                                                                                                                                                                                                                                                                                                            | Not applicable     |
|                           |        | (d) <i>Cohort study</i> —If applicable, explain how loss to follow-up was addressed<br><i>Case-control study</i> —If applicable, explain how matching of cases and controls was addressed                                                                                                                                                                                                                                                                              | 5                  |

|                          |     |                                                                                                                                                                                                              |                |
|--------------------------|-----|--------------------------------------------------------------------------------------------------------------------------------------------------------------------------------------------------------------|----------------|
|                          |     | <i>Cross-sectional study</i> —If applicable, describe analytical methods taking account of sampling strategy                                                                                                 |                |
|                          |     | (e) Describe any sensitivity analyses                                                                                                                                                                        | Not applicable |
| <b>Results</b>           |     |                                                                                                                                                                                                              |                |
| Participants             | 13* | (a) Report numbers of individuals at each stage of study—eg numbers potentially eligible, examined for eligibility, confirmed eligible, included in the study, completing follow-up, and analysed            | 4              |
|                          |     | (b) Give reasons for non-participation at each stage                                                                                                                                                         | Not applicable |
|                          |     | (c) Consider use of a flow diagram                                                                                                                                                                           | Not applicable |
| Descriptive data         | 14* | (a) Give characteristics of study participants (eg demographic, clinical, social) and information on exposures and potential confounders                                                                     | 6              |
|                          |     | (b) Indicate number of participants with missing data for each variable of interest                                                                                                                          | 5              |
|                          |     | (c) <i>Cohort study</i> —Summarise follow-up time (eg, average and total amount)                                                                                                                             | Not applicable |
| Outcome data             | 15* | <i>Cohort study</i> —Report numbers of outcome events or summary measures over time                                                                                                                          | Not applicable |
|                          |     | <i>Case-control study</i> —Report numbers in each exposure category, or summary measures of exposure                                                                                                         | Not applicable |
|                          |     | <i>Cross-sectional study</i> —Report numbers of outcome events or summary measures                                                                                                                           | 5              |
| Main results             | 16  | (a) Give unadjusted estimates and, if applicable, confounder-adjusted estimates and their precision (eg, 95% confidence interval). Make clear which confounders were adjusted for and why they were included | 6              |
|                          |     | (b) Report category boundaries when continuous variables were categorized                                                                                                                                    | 8              |
|                          |     | (c) If relevant, consider translating estimates of relative risk into absolute risk for a meaningful time period                                                                                             | 10             |
| Other analyses           | 17  | Report other analyses done—eg analyses of subgroups and interactions, and sensitivity analyses                                                                                                               | 6-12           |
| <b>Discussion</b>        |     |                                                                                                                                                                                                              |                |
| Key results              | 18  | Summarise key results with reference to study objectives                                                                                                                                                     | 12             |
| Limitations              | 19  | Discuss limitations of the study, taking into account sources of potential bias or imprecision. Discuss both direction and magnitude of any potential bias                                                   | 14             |
| Interpretation           | 20  | Give a cautious overall interpretation of results considering objectives, limitations, multiplicity of analyses, results from similar studies, and other relevant evidence                                   | 14             |
| Generalisability         | 21  | Discuss the generalisability (external validity) of the study results                                                                                                                                        | 14             |
| <b>Other information</b> |     |                                                                                                                                                                                                              |                |
| Funding                  | 22  | Give the source of funding and the role of the funders for the present study and, if applicable, for the original study on which the present article is based                                                | 14             |

\*Give information separately for cases and controls in case-control studies and, if applicable, for exposed and unexposed groups in cohort and cross-sectional studies.

**Note:** An Explanation and Elaboration article discusses each checklist item and gives methodological background and published examples of transparent reporting. The STROBE checklist is best used in conjunction with this article (freely available on the Web sites of PLoS Medicine at <http://www.plosmedicine.org/>, Annals of Internal Medicine at <http://www.annals.org/>, and Epidemiology at <http://www.epidem.com/>). Information on the STROBE Initiative is available at [www.strobe-statement.org](http://www.strobe-statement.org).
