# Supplementary material for: Prevalence and patterns of multimorbidity among the elderly in China: a cross-sectional study using national survey data
Source: PubMed Central journal article supplement — BMJ Open. 2019 Aug 18;9(8):e024268. doi: 10.1136/bmjopen-2018-024268 (PMC6701688; doi:10.1136/bmjopen-2018-024268), 2019-08-18
Supplement: bmjopen-2018-024268supp001.pdf [file bmjopen-2018-024268supp001.pdf]

**Annex 1 Sensitivity analysis, Comparison of the characteristics of complete cases and incomplete cases**

|                               | <b>Complete cases</b> | <b>Incomplete cases</b> | <b>P*</b> |
|-------------------------------|-----------------------|-------------------------|-----------|
| Number of people              | 11707                 | 876                     |           |
| Proportion (%)                | 93.04%                | 6.96%                   |           |
| Mean age All respondents (SD) | 70.20(7.907)          | 69.60 (7.824)           | <0.001    |
| <b>Male</b> (SD)              | 69.97(7.575)          | 69.58 (7.721)           | <0.001    |
| <b>Female</b> (SD)            | 70.39(8.189)          | 69.62 (7.973)           | <0.001    |
| Gender (% females)            | 51.28%                | 49.27%                  | 0.193     |

p\* = statistical significance of the difference between the complete cases and the incomplete cases (t-tests were performed for comparison of means, and chi-square-tests for differences between percentages)
