# Supplementary material for: Prevalence and patterns of multimorbidity among the elderly in China: a cross-sectional study using national survey data
Source: PubMed Central journal article supplement — BMJ Open. 2019 Aug 18;9(8):e024268. doi: 10.1136/bmjopen-2018-024268 (PMC6701688; doi:10.1136/bmjopen-2018-024268), 2019-08-18
Supplement: bmjopen-2018-024268supp002.pdf [file bmjopen-2018-024268supp002.pdf]

**Annex 2 O/E ratio of all binary and triads comorbidities pattern present in participants**

| <b>Rank</b> | <b>binary comorbidities pattern</b>                                    | <b>O/E ratio</b> |
|-------------|------------------------------------------------------------------------|------------------|
| 1           | Chronic lung diseases and Asthma                                       | 161.00           |
| 2           | Emotional, nervous, or psychiatric problems and Memory-related disease | 98.57            |
| 3           | Dyslipidemia and Diabetes or high blood sugar                          | 38.69            |
| 4           | Heart disease and Memory-related disease                               | 25.96            |
| 5           | Stroke and Memory-related disease                                      | 24.19            |
| 6           | Hypertension and Stroke                                                | 23.10            |
| 7           | Hypertension and Diabetes or high blood sugar                          | 20.77            |
| 8           | Cancer or malignant tumor and Stroke                                   | 19.71            |
| 9           | Memory-related disease and Asthma                                      | 19.71            |
| 10          | Stroke and Asthma                                                      | 19.71            |
| 11          | Hypertension and Heart disease                                         | 19.07            |
| 12          | Hypertension and Dyslipidemia                                          | 18.98            |
| 13          | Dyslipidemia and Heart disease                                         | 17.39            |
| 14          | Diabetes or high blood sugar and Heart disease                         | 14.87            |
| 15          | Diabetes or high blood sugar and Liver disease                         | 14.40            |
| 16          | Cancer or malignant tumor and Liver disease                            | 13.65            |
| 17          | Diabetes or high blood sugar and Kidney disease                        | 13.38            |
| 18          | Hypertension and Memory-related disease                                | 13.33            |
| 19          | Dyslipidemia and Cancer or malignant tumor                             | 12.51            |
| 20          | Stomach or other digestive disease and Arthritis or rheumatism         | 10.80            |
| 21          | Liver disease and Heart disease                                        | 10.49            |
| 22          | Dyslipidemia and Stroke                                                | 10.23            |
| 23          | Dyslipidemia and Stomach or other digestive disease                    | 9.81             |
| 24          | Dyslipidemia and Kidney disease                                        | 9.61             |
| 25          | Chronic lung diseases and Memory-related disease                       | 9.56             |
| 26          | Chronic lung diseases and Stroke                                       | 9.56             |
| 27          | Kidney disease and Arthritis or rheumatism                             | 9.42             |
| 28          | Heart disease and Kidney disease                                       | 9.29             |
| 29          | Chronic lung diseases and Heart disease                                | 9.12             |
| 30          | Stomach or other digestive disease and Asthma                          | 9.03             |
| 31          | Liver disease and Kidney disease                                       | 8.99             |
| 32          | Kidney disease and Stomach or other digestive disease                  | 8.92             |
| 33          | Memory-related disease and Arthritis or rheumatism                     | 8.89             |
| 34          | Stroke and Arthritis or rheumatism                                     | 8.89             |
| 35          | Arthritis or rheumatism and Asthma                                     | 8.77             |
| 36          | Liver disease and Memory-related disease                               | 8.38             |
| 37          | Diabetes or high blood sugar and Memory-related disease                | 8.32             |
| 38          | Diabetes or high blood sugar and Stroke                                | 8.32             |
| 39          | Chronic lung diseases and Arthritis or rheumatism                      | 8.14             |
| 40          | Heart disease and Stomach or other digestive disease                   | 8.11             |

|    |                                                                                    |      |
|----|------------------------------------------------------------------------------------|------|
| 41 | Heart disease and Arthritis or rheumatism                                          | 7.45 |
| 42 | Stomach or other digestive disease and Emotional, nervous, or psychiatric problems | 7.39 |
| 43 | Liver disease and Stomach or other digestive disease                               | 7.33 |
| 44 | Diabetes or high blood sugar and Cancer or malignant tumor                         | 6.78 |
| 45 | Diabetes or high blood sugar and Asthma                                            | 6.78 |
| 46 | Diabetes or high blood sugar and Arthritis or rheumatism                           | 6.44 |
| 47 | Liver disease and Arthritis or rheumatism                                          | 6.16 |
| 48 | Chronic lung diseases and Kidney disease                                           | 5.98 |
| 49 | Chronic lung diseases and Stomach or other digestive disease                       | 5.97 |
| 50 | Hypertension and Arthritis or rheumatism                                           | 5.74 |
| 51 | Chronic lung diseases and Liver disease                                            | 5.52 |
| 52 | Kidney disease and Emotional, nervous, or psychiatric problems                     | 5.29 |
| 53 | Kidney disease and Asthma                                                          | 5.29 |
| 54 | Chronic lung diseases and Emotional, nervous, or psychiatric problems              | 5.19 |
| 55 | Dyslipidemia and Memory-related disease                                            | 5.12 |
| 56 | Hypertension and Emotional, nervous, or psychiatric problems                       | 5.07 |
| 57 | Hypertension and Chronic lung diseases                                             | 5.03 |
| 58 | Hypertension and Kidney disease                                                    | 5.01 |
| 59 | Cancer or malignant tumor and Arthritis or rheumatism                              | 4.96 |
| 60 | Cancer or malignant tumor and Stomach or other digestive disease                   | 4.93 |
| 61 | Dyslipidemia and Arthritis or rheumatism                                           | 4.75 |
| 62 | Hypertension and Liver disease                                                     | 4.61 |
| 63 | Diabetes or high blood sugar and Chronic lung diseases                             | 4.38 |
| 64 | Heart disease and Stroke                                                           | 4.33 |
| 65 | Dyslipidemia and Asthma                                                            | 4.17 |
| 66 | Hypertension and Stomach or other digestive disease                                | 3.85 |
| 67 | Cancer or malignant tumor and Heart disease                                        | 3.53 |
| 68 | Heart disease and Asthma                                                           | 3.53 |
| 69 | Emotional, nervous, or psychiatric problems and Arthritis or rheumatism            | 3.43 |
| 70 | Diabetes or high blood sugar and Stomach or other digestive disease                | 3.12 |
| 71 | Hypertension and Cancer or malignant tumor                                         | 2.17 |
| 72 | Hypertension and Asthma                                                            | 2.17 |
| 73 | Stomach or other digestive disease and Memory-related disease                      | 2.02 |
| 74 | Stroke and Stomach or other digestive disease                                      | 2.02 |
| 75 | Dyslipidemia and Liver disease                                                     | 1.77 |
| 76 | Dyslipidemia and Chronic lung diseases                                             | 1.35 |

| Rank | triads comorbidities pattern                                                               | O/E ratio |
|------|--------------------------------------------------------------------------------------------|-----------|
| 1    | Stroke, Emotional, nervous, or psychiatric problems and Memory-related disease             | 10491.60  |
| 2    | Emotional, nervous, or psychiatric problems, Memory-related disease, Asthma,               | 8548.88   |
| 3    | Heart disease, Stroke and Memory-related disease                                           | 2302.62   |
| 4    | Chronic lung diseases, Emotional, nervous, or psychiatric problems and Asthma              | 2252.13   |
| 5    | Chronic lung diseases, Heart disease, Asthma,                                              | 1977.13   |
| 6    | Dyslipidemia, Heart disease and Memory-related disease                                     | 1461.04   |
| 7    | Hypertension, Stroke and Memory-related disease                                            | 1418.54   |
| 8    | Hypertension, Dyslipidemia and Diabetes or high blood sugar                                | 1409.29   |
| 9    | Chronic lung diseases, Memory-related disease and Asthma                                   | 1381.96   |
| 10   | Chronic lung diseases, Arthritis or rheumatism and Asthma                                  | 1256.63   |
| 11   | Dyslipidemia, Diabetes or high blood sugar and Kidney disease                              | 1255.51   |
| 12   | Cancer or malignant tumor, Chronic lung diseases and Asthma                                | 1126.07   |
| 13   | Chronic lung diseases, Kidney disease and Asthma                                           | 1112.24   |
| 14   | Liver disease, Kidney disease and Asthma                                                   | 974.52    |
| 15   | Dyslipidemia, Diabetes or high blood sugar and Liver disease                               | 972.21    |
| 16   | Chronic lung diseases, Liver disease and Asthma                                            | 956.96    |
| 17   | Dyslipidemia, Diabetes or high blood sugar and Stroke                                      | 935.99    |
| 18   | Chronic lung diseases, Stomach or other digestive disease and Asthma                       | 921.21    |
| 19   | Hypertension, Dyslipidemia and Heart disease                                               | 876.36    |
| 20   | Diabetes or high blood sugar, Liver disease and Kidney disease                             | 822.11    |
| 21   | Hypertension, Diabetes or high blood sugar and Stroke                                      | 812.58    |
| 22   | Hypertension, Chronic lung diseases and Asthma                                             | 812.01    |
| 23   | Hypertension, Dyslipidemia and Stroke                                                      | 800.07    |
| 24   | Dyslipidemia, Heart disease and Asthma                                                     | 793.67    |
| 25   | Diabetes or high blood sugar, Heart disease and Stroke                                     | 791.41    |
| 26   | Hypertension, Emotional, nervous, or psychiatric problems and Memory-related disease       | 770.58    |
| 27   | Dyslipidemia, Diabetes or high blood sugar and Cancer or malignant tumor                   | 762.67    |
| 28   | Dyslipidemia, Diabetes or high blood sugar and Emotional, nervous, or psychiatric problems | 762.67    |
| 29   | Dyslipidemia, Diabetes or high blood sugar and Heart disease                               | 669.54    |
| 30   | Liver disease, Heart disease and Emotional, nervous, or psychiatric problems               | 649.62    |
| 31   | Heart disease, Kidney disease and Memory-related disease                                   | 617.74    |
| 32   | Heart disease, Stroke and Kidney disease                                                   | 617.74    |
| 33   | Dyslipidemia, Chronic lung diseases and Asthma                                             | 584.58    |
| 34   | Diabetes or high blood sugar, Liver disease and Heart disease                              | 548.02    |

|    |                                                                                                            |        |
|----|------------------------------------------------------------------------------------------------------------|--------|
| 35 | Hypertension, Diabetes or high blood sugar and Heart disease                                               | 523.14 |
| 36 | Hypertension, Heart disease and Stroke                                                                     | 507.36 |
| 37 | Diabetes or high blood sugar, Chronic lung diseases and Asthma                                             | 474.98 |
| 38 | Liver disease, Stomach or other digestive disease and Asthma                                               | 454.02 |
| 39 | Stomach or other digestive disease, Emotional, nervous, or psychiatric problems and Memory-related disease | 437.10 |
| 40 | Hypertension, Memory-related disease, Asthma,                                                              | 385.29 |
| 41 | Diabetes or high blood sugar, Stomach or other digestive disease and Asthma                                | 300.46 |
| 42 | Hypertension, Dyslipidemia and Memory-related disease                                                      | 300.03 |
| 43 | Liver disease, Kidney disease and Arthritis or rheumatism                                                  | 277.66 |
| 44 | Hypertension, Heart disease and Memory-related disease                                                     | 253.68 |
| 45 | Dyslipidemia, Liver disease and Kidney disease                                                             | 252.95 |
| 46 | Hypertension, Chronic lung diseases and Stroke                                                             | 249.13 |
| 47 | Stroke, Memory-related disease and Arthritis or rheumatism                                                 | 249.11 |
| 48 | Dyslipidemia, Chronic lung diseases and Liver disease                                                      | 248.40 |
| 49 | Cancer or malignant tumor, Chronic lung diseases and Heart disease                                         | 247.14 |
| 50 | Chronic lung diseases, Heart disease and Emotional, nervous, or psychiatric problems                       | 247.14 |
| 51 | Hypertension, Dyslipidemia and Asthma                                                                      | 244.47 |
| 52 | Cancer or malignant tumor, Heart disease and Stomach or other digestive disease                            | 234.50 |
| 53 | Chronic lung diseases, Memory-related disease and Arthritis or rheumatism                                  | 229.69 |
| 54 | Chronic lung diseases, Stroke and Stomach or other digestive disease                                       | 211.98 |
| 55 | Hypertension, Stroke and Arthritis or rheumatism                                                           | 210.41 |
| 56 | Chronic lung diseases, Liver disease and Heart disease                                                     | 210.03 |
| 57 | Hypertension, Cancer or malignant tumor and Heart disease                                                  | 206.71 |
| 58 | Hypertension, Heart disease and Emotional, nervous, or psychiatric problems                                | 206.71 |
| 59 | Memory-related disease, Arthritis or rheumatism and Asthma                                                 | 202.98 |
| 60 | Emotional, nervous, or psychiatric problems, Memory-related disease and Arthritis or rheumatism            | 202.98 |
| 61 | Stroke, Emotional, nervous, or psychiatric problems and Arthritis or rheumatism                            | 202.98 |
| 62 | Stroke, Kidney disease and Arthritis or rheumatism                                                         | 200.49 |
| 63 | Dyslipidemia, Diabetes or high blood sugar and Stomach or other digestive disease                          | 194.98 |
| 64 | Liver disease, Stomach or other digestive disease and Memory-related disease                               | 185.73 |
| 65 | Dyslipidemia, Stomach or other digestive disease and Asthma                                                | 184.90 |
| 66 | Diabetes or high blood sugar, Stomach or other digestive disease and Memory-related disease                | 184.37 |
| 67 | Diabetes or high blood sugar, Heart disease and Arthritis or rheumatism                                    | 183.74 |

|     |                                                                                                   |        |
|-----|---------------------------------------------------------------------------------------------------|--------|
| 68  | Chronic lung diseases, Stroke and Arthritis or rheumatism                                         | 164.06 |
| 69  | Kidney disease, Arthritis or rheumatism and Asthma                                                | 163.36 |
| 70  | Dyslipidemia, Diabetes or high blood sugar and Arthritis or rheumatism                            | 162.98 |
| 71  | Hypertension, Diabetes or high blood sugar and Memory-related disease                             | 162.52 |
| 72  | Hypertension, Dyslipidemia and Kidney disease                                                     | 160.98 |
| 73  | Hypertension, Heart disease and Kidney disease                                                    | 158.80 |
| 74  | Chronic lung diseases, Liver disease and Kidney disease                                           | 157.53 |
| 75  | Dyslipidemia, Liver disease and Stomach or other digestive disease                                | 157.13 |
| 76  | Heart disease, Kidney disease and Stomach or other digestive disease                              | 154.42 |
| 77  | Cancer or malignant tumor, Liver disease and Stomach or other digestive disease                   | 151.34 |
| 78  | Liver disease, Stomach or other digestive disease and Emotional, nervous, or psychiatric problems | 151.34 |
| 79  | Heart disease, Arthritis or rheumatism and Asthma                                                 | 145.20 |
| 80  | Stroke, Kidney disease and Stomach or other digestive disease                                     | 143.91 |
| 81  | Liver disease, Emotional, nervous, or psychiatric problems and Arthritis or rheumatism            | 140.56 |
| 82  | Diabetes or high blood sugar, Arthritis or rheumatism and Asthma                                  | 139.53 |
| 83  | Hypertension, Dyslipidemia and Liver disease                                                      | 138.50 |
| 84  | Hypertension, Heart disease and Asthma                                                            | 137.80 |
| 85  | Kidney disease, Stomach or other digestive disease and Arthritis or rheumatism                    | 136.43 |
| 86  | Chronic lung diseases, Emotional, nervous, or psychiatric problems and Arthritis or rheumatism    | 133.68 |
| 87  | Hypertension, Liver disease and Asthma                                                            | 133.40 |
| 88  | Hypertension, Diabetes or high blood sugar and Cancer or malignant tumor                          | 132.42 |
| 89  | Chronic lung diseases, Stomach or other digestive disease and Arthritis or rheumatism             | 131.24 |
| 90  | Hypertension, Diabetes or high blood sugar and Kidney disease                                     | 130.80 |
| 91  | Heart disease, Stomach or other digestive disease and Arthritis or rheumatism                     | 128.06 |
| 92  | Dyslipidemia, Heart disease and Stomach or other digestive disease                                | 121.74 |
| 93  | Hypertension, Heart disease and Arthritis or rheumatism                                           | 121.06 |
| 94  | Stomach or other digestive disease, Arthritis or rheumatism and Asthma                            | 118.39 |
| 95  | Chronic lung diseases, Heart disease and Arthritis or rheumatism                                  | 117.36 |
| 96  | Hypertension, Liver disease and Heart disease                                                     | 117.11 |
| 97  | Diabetes or high blood sugar, Kidney disease and Arthritis or rheumatism                          | 114.85 |
| 98  | Chronic lung diseases, Heart disease and Stomach or other digestive disease                       | 113.73 |
| 99  | Hypertension, Diabetes or high blood sugar and Liver disease                                      | 112.54 |
| 100 | Diabetes or high blood sugar, Chronic lung diseases and Heart disease                             | 104.24 |
| 101 | Liver disease, Stomach or other digestive disease and Arthritis or rheumatism                     | 104.21 |
| 102 | Stroke, Stomach or other digestive disease and Arthritis or rheumatism                            | 103.78 |

|     |                                                                                                  |        |
|-----|--------------------------------------------------------------------------------------------------|--------|
| 103 | Hypertension, Kidney disease and Emotional, nervous, or psychiatric problems                     | 103.36 |
| 104 | Chronic lung diseases, Liver disease and Arthritis or rheumatism                                 | 102.25 |
| 105 | Hypertension, Dyslipidemia and Arthritis or rheumatism                                           | 100.61 |
| 106 | Liver disease, Kidney disease and Stomach or other digestive disease                             | 99.65  |
| 107 | Dyslipidemia, Cancer or malignant tumor and Stomach or other digestive disease                   | 92.45  |
| 108 | Dyslipidemia, Stomach or other digestive disease and Emotional, nervous, or psychiatric problems | 92.45  |
| 109 | Hypertension, Dyslipidemia and Chronic lung diseases                                             | 92.21  |
| 110 | Hypertension, Chronic lung diseases and Heart disease                                            | 89.11  |
| 111 | Heart disease, Stroke and Arthritis or rheumatism                                                | 89.10  |
| 112 | Hypertension, Heart disease and Stomach or other digestive disease                               | 88.07  |
| 113 | Chronic lung diseases, Heart disease and Kidney disease                                          | 81.37  |
| 114 | Chronic lung diseases, Kidney disease and Arthritis or rheumatism                                | 79.23  |
| 115 | Diabetes or high blood sugar, Chronic lung diseases and Arthritis or rheumatism                  | 78.94  |
| 116 | Chronic lung diseases, Kidney disease and Stomach or other digestive disease                     | 75.82  |
| 117 | Hypertension, Diabetes or high blood sugar and Arthritis or rheumatism                           | 75.46  |
| 118 | Hypertension, Dyslipidemia and Stomach or other digestive disease                                | 75.00  |
| 119 | Chronic lung diseases, Liver disease and Stomach or other digestive disease                      | 73.39  |
| 120 | Hypertension, Memory-related disease and Arthritis or rheumatism                                 | 73.19  |
| 121 | Stomach or other digestive disease, Memory-related disease and Arthritis or rheumatism           | 72.65  |
| 122 | Heart disease, Kidney disease and Arthritis or rheumatism                                        | 71.71  |
| 123 | Liver disease, Arthritis or rheumatism and Asthma                                                | 70.28  |
| 124 | Diabetes or high blood sugar, Cancer or malignant tumor and Arthritis or rheumatism              | 69.76  |
| 125 | Kidney disease, Memory-related disease and Arthritis or rheumatism                               | 66.83  |
| 126 | Dyslipidemia, Heart disease and Arthritis or rheumatism                                          | 65.96  |
| 127 | Diabetes or high blood sugar, Heart disease and Stomach or other digestive disease               | 65.94  |
| 128 | Dyslipidemia, Chronic lung diseases and Heart disease                                            | 64.15  |
| 129 | Hypertension, Kidney disease and Arthritis or rheumatism                                         | 63.81  |
| 130 | Dyslipidemia, Stomach or other digestive disease and Arthritis or rheumatism                     | 63.66  |
| 131 | Hypertension, Chronic lung diseases and Memory-related disease                                   | 62.28  |
| 132 | Dyslipidemia, Kidney disease and Stomach or other digestive disease                              | 60.88  |
| 133 | Hypertension, Stroke and Stomach or other digestive disease                                      | 59.10  |
| 134 | Cancer or malignant tumor, Chronic lung diseases and Stomach or other digestive disease          | 57.58  |

|     |                                                                                                             |       |
|-----|-------------------------------------------------------------------------------------------------------------|-------|
| 135 | Cancer or malignant tumor, Chronic lung diseases and Arthritis or rheumatism                                | 53.47 |
| 136 | Hypertension, Stomach or other digestive disease and Arthritis or rheumatism                                | 52.98 |
| 137 | Dyslipidemia, Memory-related disease and Arthritis or rheumatism                                            | 52.69 |
| 138 | Dyslipidemia, Stroke and Arthritis or rheumatism                                                            | 52.69 |
| 139 | Hypertension, Cancer or malignant tumor and Chronic lung diseases                                           | 50.75 |
| 140 | Hypertension, Chronic lung diseases and Kidney disease                                                      | 50.13 |
| 141 | Liver disease, Heart disease and Arthritis or rheumatism                                                    | 46.27 |
| 142 | Hypertension, Cancer or malignant tumor and Arthritis or rheumatism                                         | 44.73 |
| 143 | Hypertension, Liver disease and Kidney disease                                                              | 43.92 |
| 144 | Hypertension, Chronic lung diseases and Liver disease                                                       | 43.13 |
| 145 | Dyslipidemia, Cancer or malignant tumor and Arthritis or rheumatism                                         | 42.93 |
| 146 | Dyslipidemia, Arthritis or rheumatism and Asthma                                                            | 42.93 |
| 147 | Hypertension, Diabetes or high blood sugar and Chronic lung diseases                                        | 42.81 |
| 148 | Dyslipidemia, Kidney disease and Arthritis or rheumatism                                                    | 42.40 |
| 149 | Stomach or other digestive disease, Emotional, nervous, or psychiatric problems and Arthritis or rheumatism | 42.28 |
| 150 | Hypertension, Liver disease and Arthritis or rheumatism                                                     | 41.18 |
| 151 | Hypertension, Stomach or other digestive disease and Memory-related disease                                 | 39.40 |
| 152 | Diabetes or high blood sugar, Stomach or other digestive disease and Arthritis or rheumatism                | 39.24 |
| 153 | Hypertension, Arthritis or rheumatism and Asthma                                                            | 37.27 |
| 154 | Dyslipidemia, Liver disease and Arthritis or rheumatism                                                     | 36.48 |
| 155 | Heart disease, Emotional, nervous, or psychiatric problems and Arthritis or rheumatism                      | 36.30 |
| 156 | Hypertension, Chronic lung diseases and Arthritis or rheumatism                                             | 34.95 |
| 157 | Dyslipidemia, Chronic lung diseases and Arthritis or rheumatism                                             | 34.70 |
| 158 | Hypertension, Diabetes or high blood sugar and Stomach or other digestive disease                           | 33.85 |
| 159 | Cancer or malignant tumor, Stomach or other digestive disease and Arthritis or rheumatism                   | 33.83 |
| 160 | Liver disease, Heart disease and Stomach or other digestive disease                                         | 33.21 |
| 161 | Dyslipidemia, Chronic lung diseases and Stomach or other digestive disease                                  | 29.89 |
| 162 | Diabetes or high blood sugar, Liver disease and Arthritis or rheumatism                                     | 29.64 |
| 163 | Hypertension, Kidney disease and Stomach or other digestive disease                                         | 26.42 |
| 164 | Diabetes or high blood sugar, Chronic lung diseases and Stomach or other digestive disease                  | 24.29 |
| 165 | Hypertension, Emotional, nervous, or psychiatric problems and Arthritis or rheumatism                       | 22.36 |
| 166 | Hypertension, Liver disease and Stomach or other digestive disease                                          | 20.46 |

---

|     |                                                                                                  |       |
|-----|--------------------------------------------------------------------------------------------------|-------|
| 167 | Hypertension, Cancer or malignant tumor and Stomach or other digestive disease                   | 16.05 |
| 168 | Hypertension, Stomach or other digestive disease and Emotional, nervous, or psychiatric problems | 16.05 |
| 169 | Hypertension, Chronic lung diseases and Stomach or other digestive disease                       | 15.57 |

---
